# Supplementary material for: Genome-Wide Association Analysis Reveals Trait-Linked Markers for Grain Nutrient and Agronomic Traits in Diverse Set of Chickpea Germplasm
Source: MDPI journal article supplement (doi:10.3390/cells11152457), 2022-08-08
Supplement: s1 [file s1]

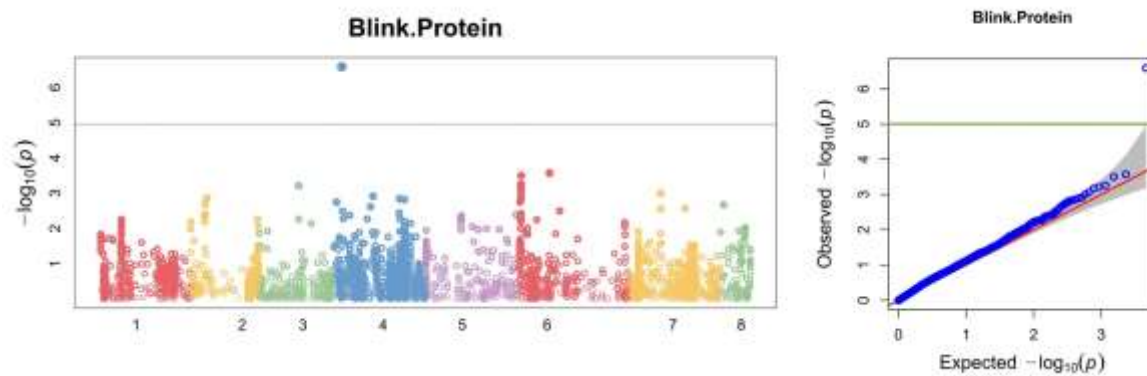

**Supplementary Figure S1.** Manhattan plots illustrated significant P-value associated with grain protein content in chickpea under NSI.

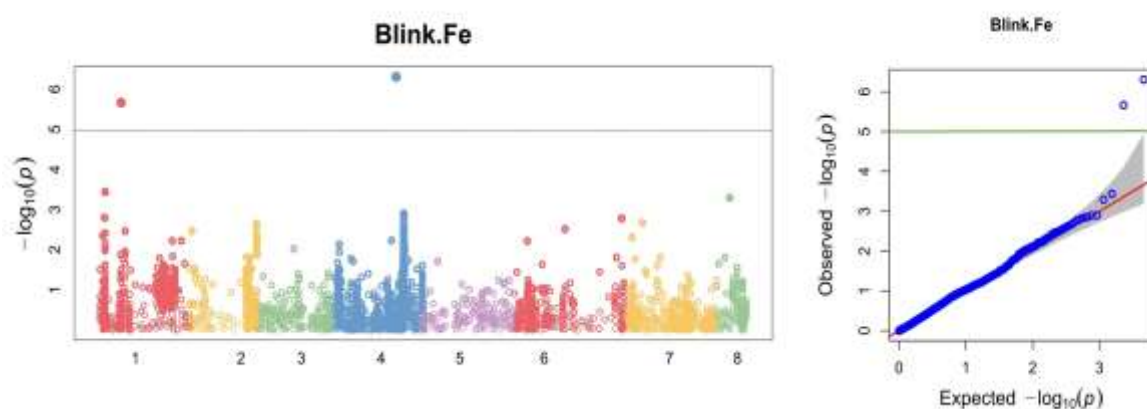

**Supplementary Figure S2.** Manhattan plots illustrated significant P-value associated with grain Fe content in chickpea under NSII.

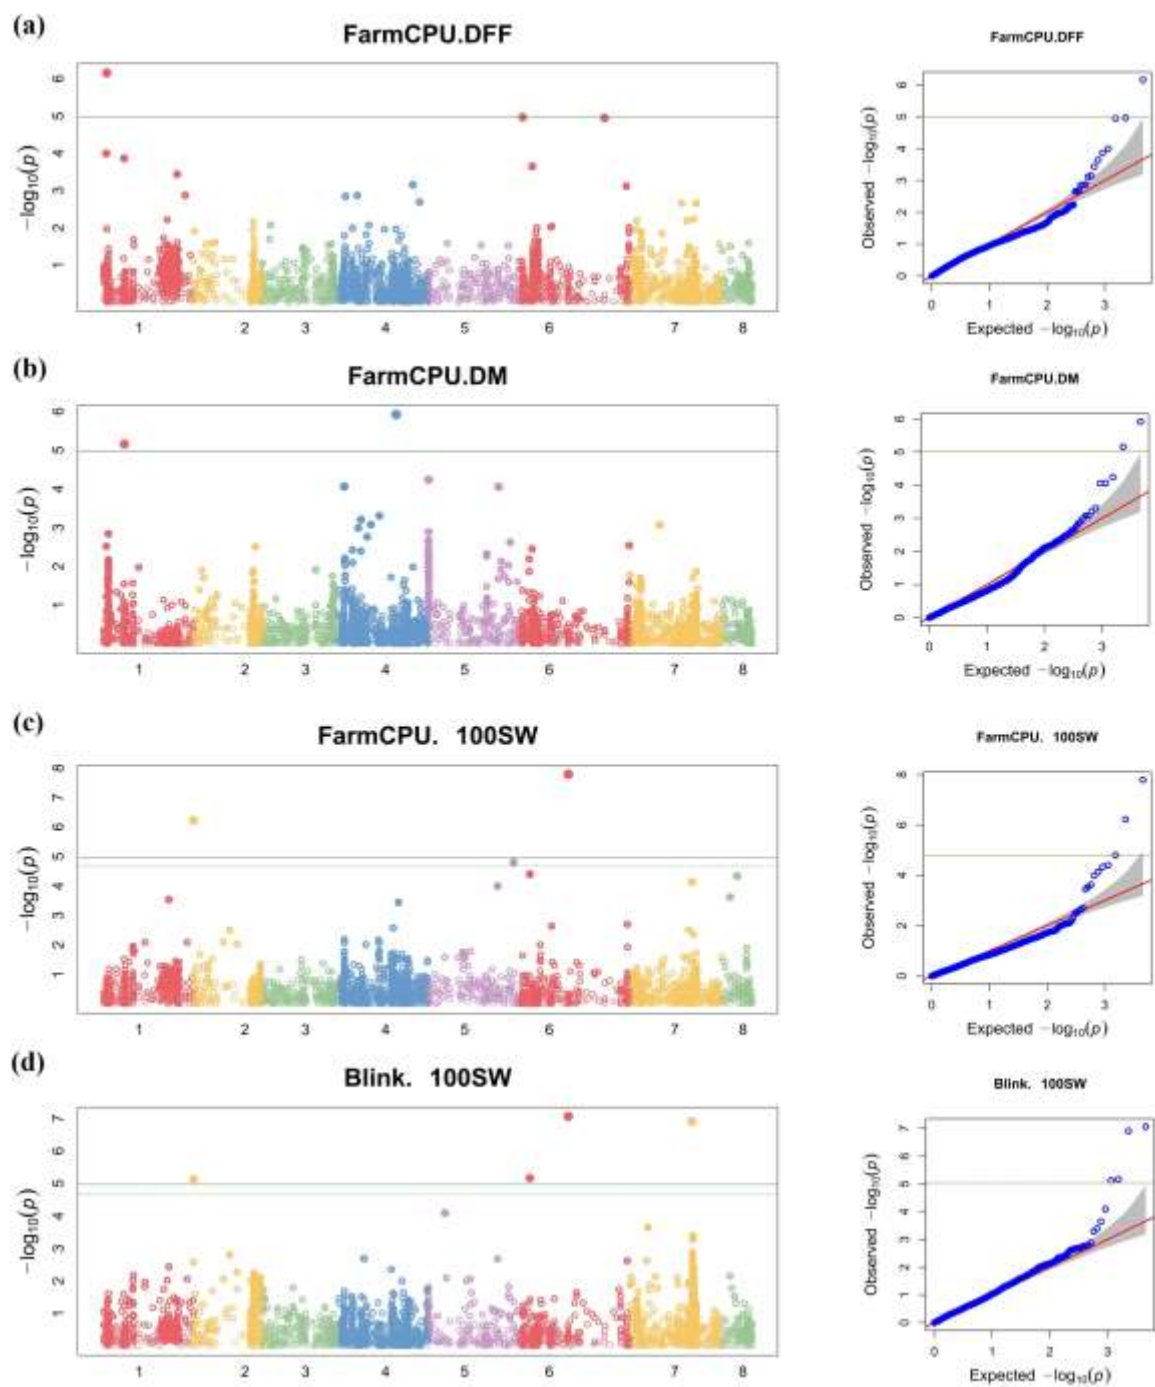

**Supplementary Figure S3.** Manhattan plots illustrated significant P-value associated with, DFF (a), DM (b), 100 SW (c and d) in chickpea under NSI. Dotted line-suggestive MTAs at FDR cutoff  $P < 0.05$ .

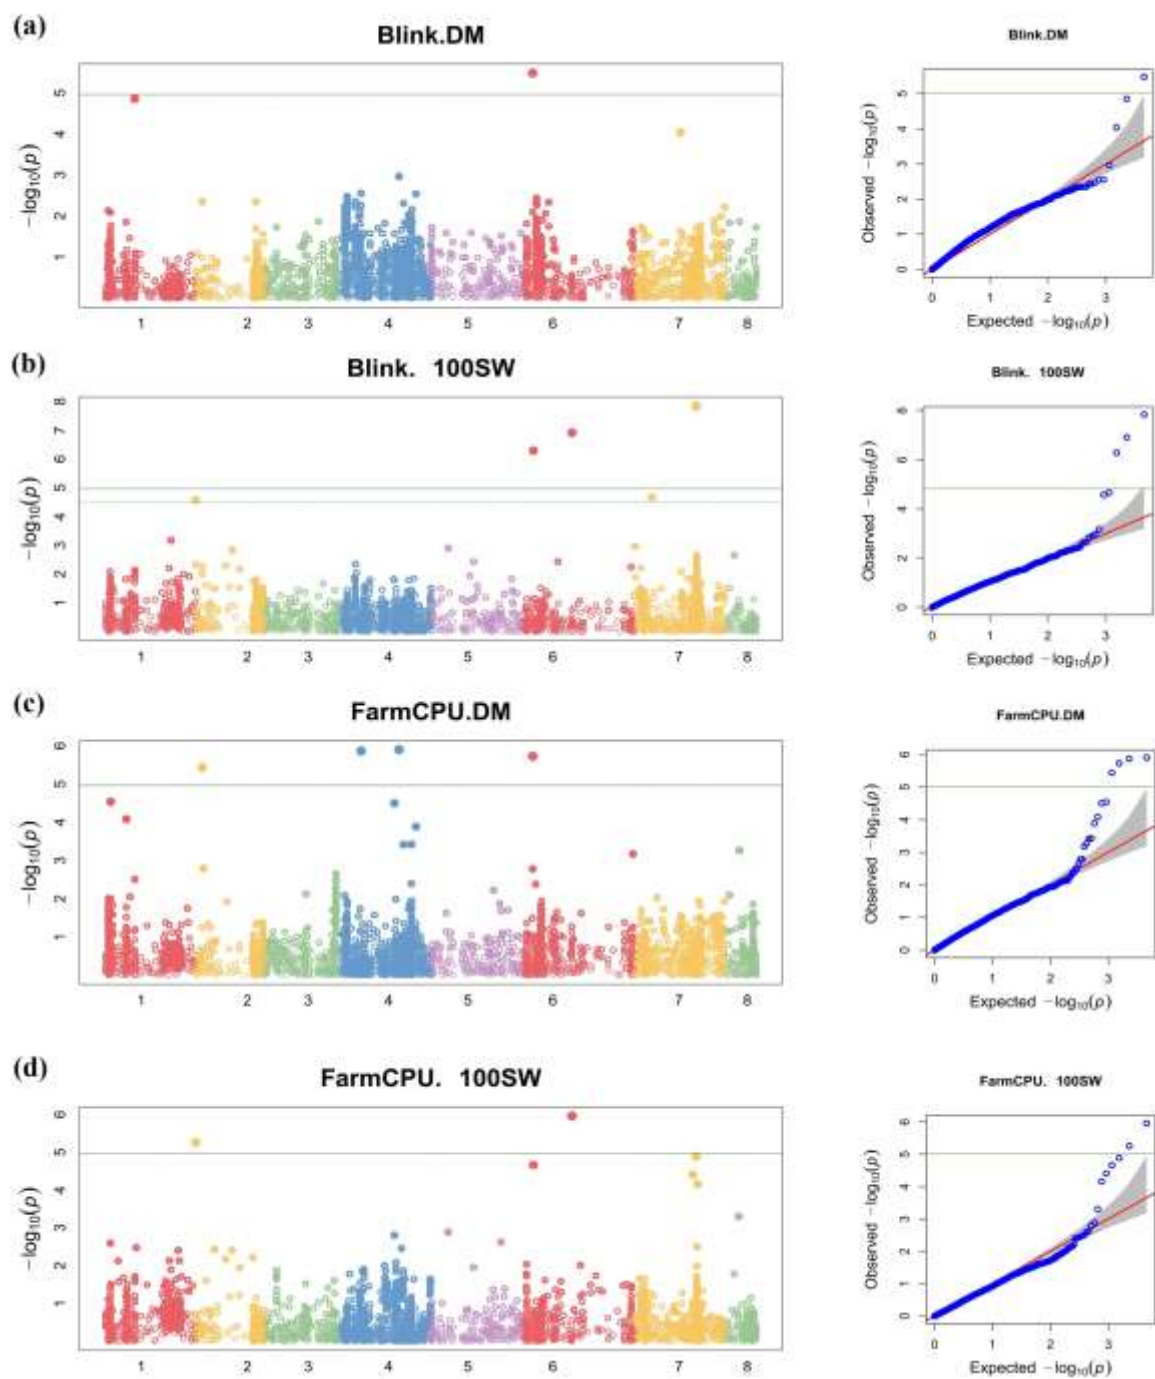

**Supplementary Figure S4.** Manhattan plots illustrated significant P-value associated with DM (a and c), 100 SW (b and d) in chickpea under pooled seasons. Dotted line-suggestive MTAs at FDR cutoff  $P < 0.05$ .

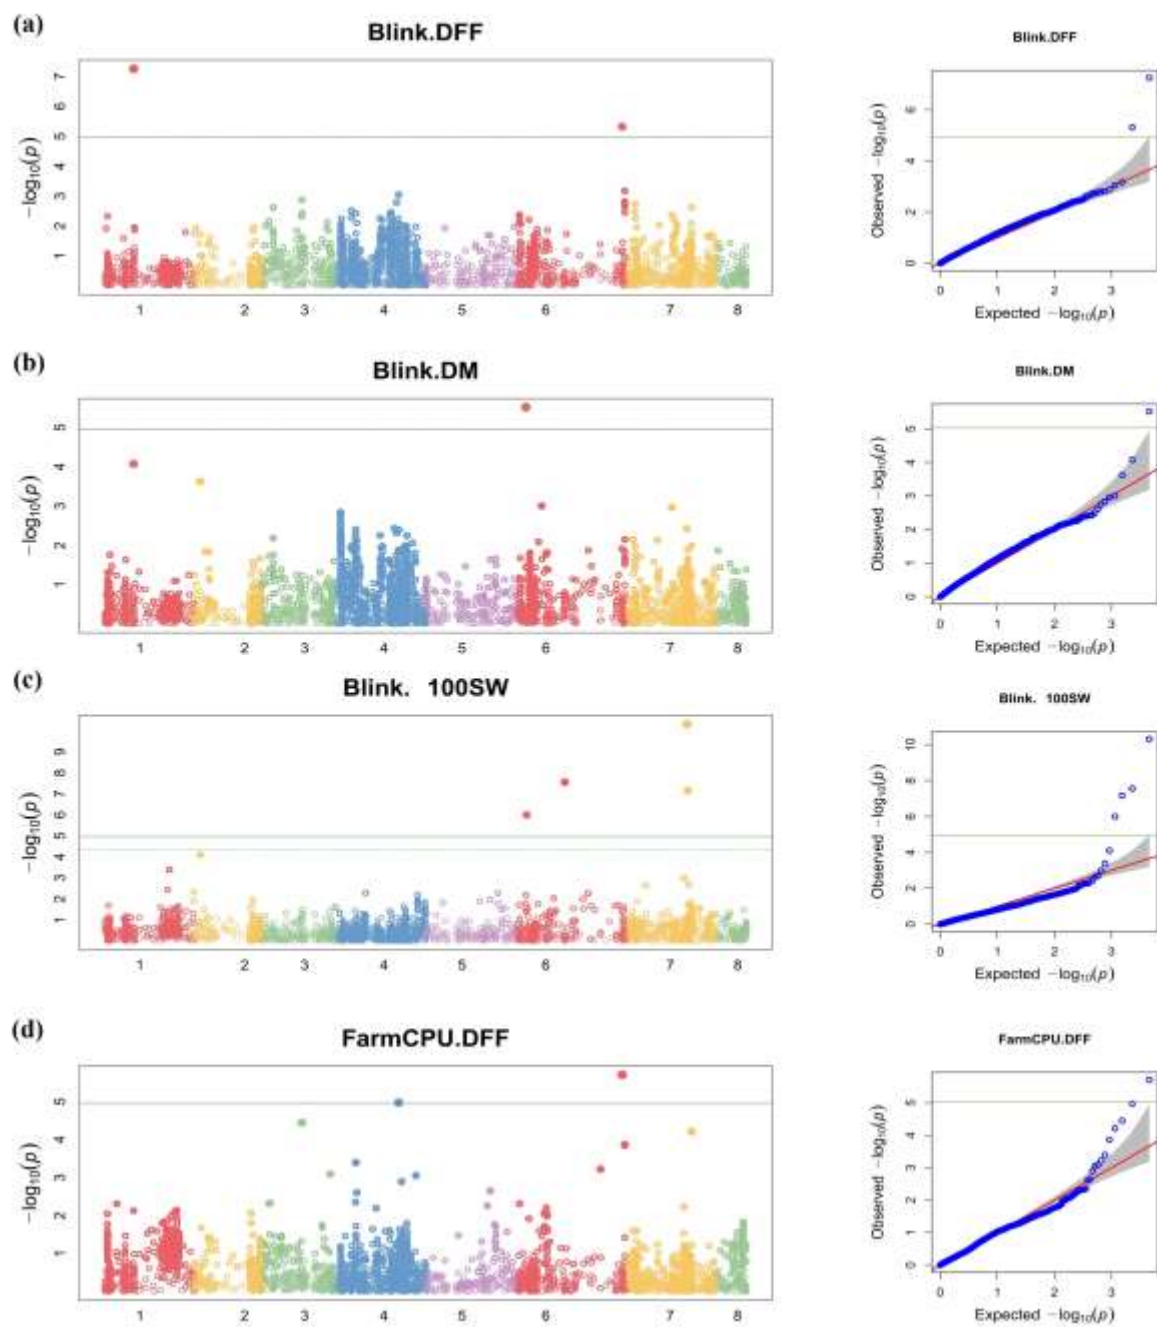

**Supplementary Figure S5.** Manhattan plots illustrated significant P-value associated with DFF (a and d), DM (b), 100 SW (c) in chickpea under NSII. Dotted line-suggestive MTAs at FDR cutoff  $P < 0.05$ .

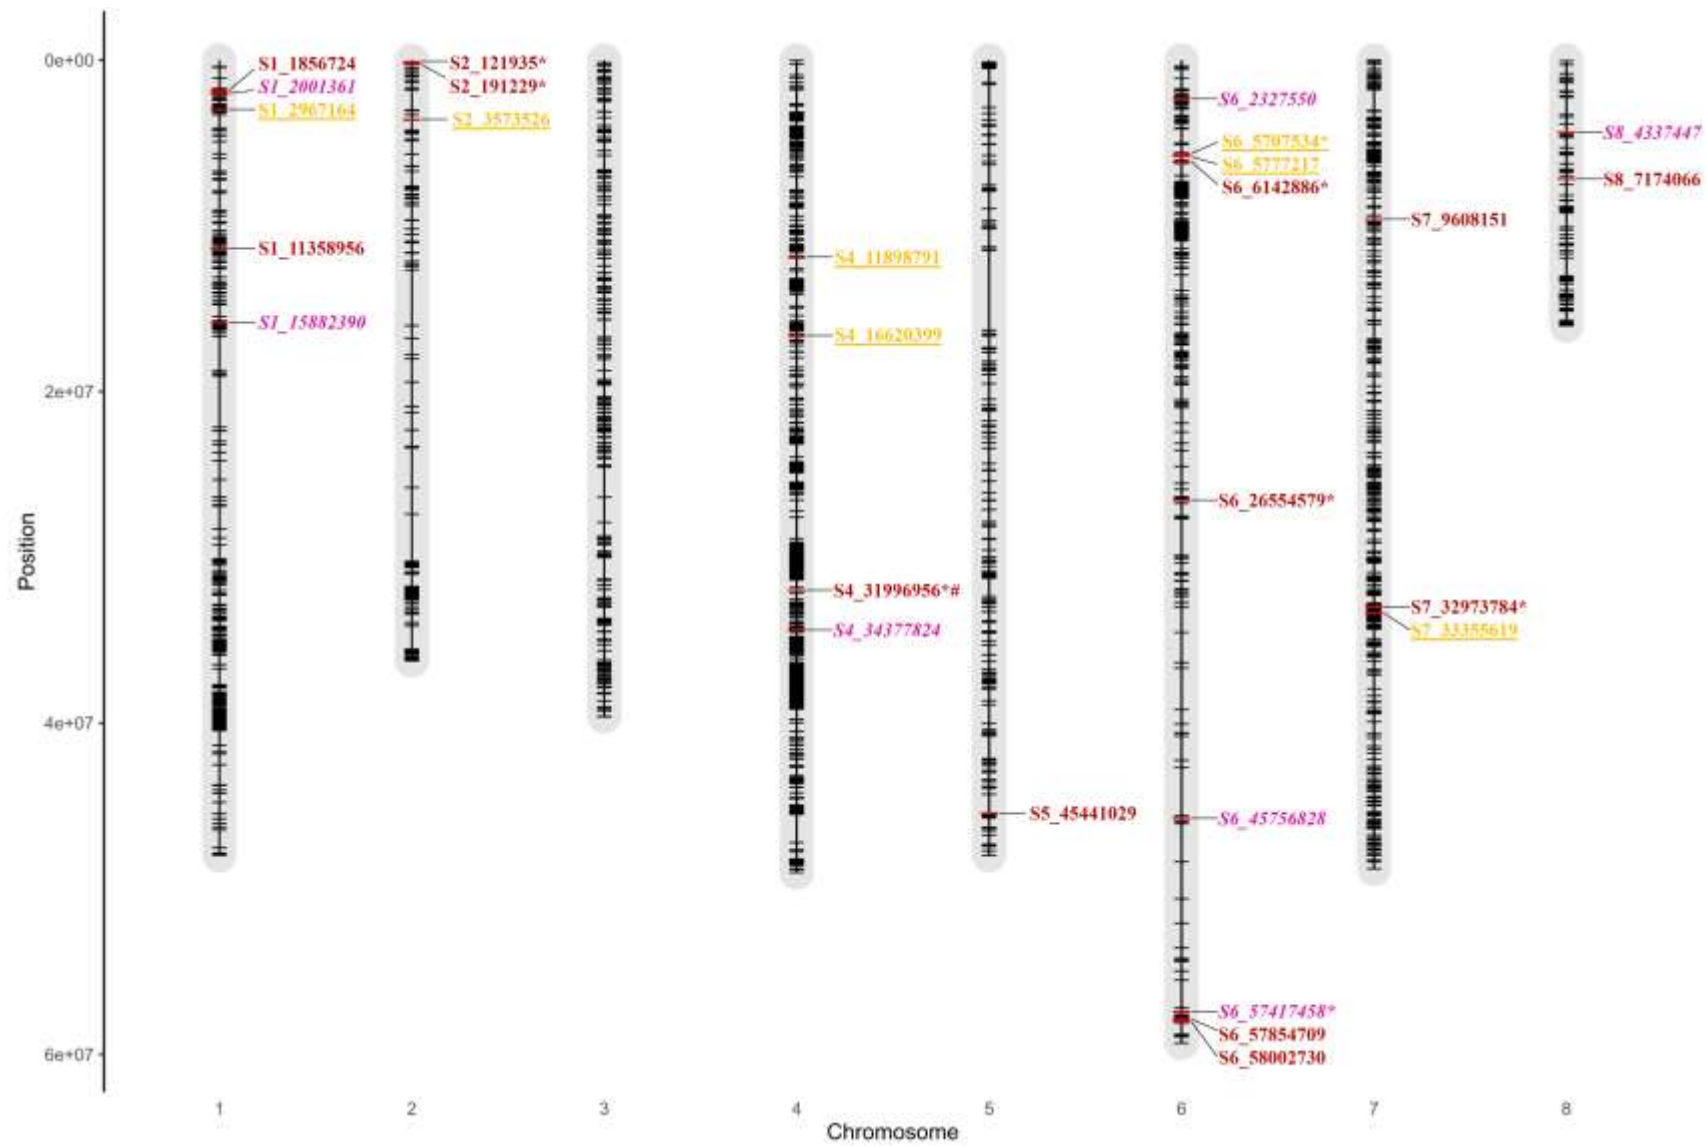

**Supplementary Figure S6.** Visualization of significantly associated SNPs (MTAs) along with co-associated SNPs (\*) over the seasons on chickpea chromosomes for DFF (Pink- **Bold Italic**), DM (Yellow-**Bold underline**), 100 SW (Maroon- **Bold**).
