# Supplementary material for: Genome-Wide Association Analysis Reveals Trait-Linked Markers for Grain Nutrient and Agronomic Traits in Diverse Set of Chickpea Germplasm
Source: Cells. 2022 Aug 8;11(15):2457. doi: 10.3390/cells11152457 (PMC9367858; doi:10.3390/cells11152457)
Supplement: Supplementary file 1 [file cells-11-02457-s001.zip › cells-1788890-supplementary xml.xlsx]

## Sheet: Reference set (280 accessions)
Supplementary Table S1. Chickpea reference set accessions with origin and biological status
Entry	Accession	Type	Origin	Biological status
1	ICC 67	Desi	India	Landrace
2	ICC 95	Desi	India	Landrace
3	ICC 283	Desi	India	Landrace
4	ICC 440	Desi	India	Landrace
5	ICC 456	Desi	India	Landrace
6	ICC 506	Desi	India	Landrace
7	ICC 637	Desi	India	Landrace
8	ICC 672	Desi	India	Landrace
9	ICC 708	Desi	India	Landrace
10	ICC 762	Desi	India	Landrace
11	ICC 791	Desi	India	Landrace
12	ICC 867	Desi	India	Landrace
13	ICC 1052	Desi	Pakistan	Landrace
14	ICC 1083	Desi	Iran	Landrace
15	ICC 1098	Desi	Iran	Landrace
16	ICC 1161	Kabuli	Pakistan	Landrace
17	ICC 1164	Kabuli	Nigeria	Landrace
18	ICC 1180	Desi	India	Landrace
19	ICC 1194	Desi	India	Landrace
20	ICC 1205	Desi	India	Landrace
21	ICC 1230	Desi	India	Landrace
22	ICC 1356	Desi	India	Landrace
23	ICC 1392	Desi	India	Landrace
24	ICC 1397	Desi	India	Landrace
25	ICC 1398	Desi	India	Landrace
26	ICC 1422	Desi	India	Landrace
27	ICC 1431	Desi	India	Landrace
28	ICC 1510	Desi	India	Landrace
29	ICC 1710	Desi	India	Landrace
30	ICC 1715	Desi	India	Landrace
31	ICC 1882	Desi	India	Landrace
32	ICC 1915	Desi	India	Landrace
33	ICC 1923	Desi	India	Landrace
34	ICC 2065	Desi	India	Landrace
35	ICC 2072	Desi	India	Landrace
36	ICC 2210	Desi	Algeria	Landrace
37	ICC 2242	Desi	India	Landrace
38	ICC 2263	Desi	Iran	Landrace
39	ICC 2277	Kabuli	Iran	Landrace
40	ICC 2482	Kabuli	Iran	Landrace
41	ICC 2507	Desi	Iran	Landrace
42	ICC 2580	Desi	Iran	Landrace
43	ICC 2593	Kabuli	Iran	Landrace
44	ICC 2629	Desi	Iran	Landrace
45	ICC 2679	Desi	Iran	Landrace
46	ICC 2720	Desi	Iran	Landrace
47	ICC 2737	Desi	Iran	Landrace
48	ICC 2884	Desi	Iran	Landrace
49	ICC 2919	Desi	Iran	Landrace
50	ICC 2969	Desi	Iran	Landrace
51	ICC 2990	Desi	Iran	Landrace
52	ICC 3218	Desi	Iran	Landrace
53	ICC 3230	Desi	Iran	Landrace
54	ICC 3239	Desi	Iran	Landrace
55	ICC 3325	Desi	Cyprus	Landrace
56	ICC 3362	Desi	Iran	Landrace
57	ICC 3391	Desi	Iran	Landrace
58	ICC 3410	Kabuli	Iran	Landrace
59	ICC 3421	Kabuli	Israel	Landrace
60	ICC 3512	Desi	Iran	Landrace
61	ICC 3582	Desi	Iran	Landrace
62	ICC 3631	Desi	Iran	Landrace
63	ICC 3761	Desi	Iran	Landrace
64	ICC 3776	Desi	Iran	Landrace
65	ICC 3892	Desi	Iran	Landrace
66	ICC 3946	Desi	Iran	Landrace
67	ICC 4093	Desi	Iran	Landrace
68	ICC 4182	Desi	Iran	Landrace
69	ICC 4363	Desi	Iran	Landrace
70	ICC 4418	Desi	Iran	Landrace
71	ICC 4463	Desi	Iran	Landrace
72	ICC 4495	Desi	Turkey	Landrace
73	ICC 4533	Desi	India	Landrace
74	ICC 4567	Desi	India	Landrace
75	ICC 4593	Desi	India	Landrace
76	ICC 4639	Desi	India	Landrace
77	ICC 4657	Desi	India	Landrace
78	ICC 4814	Desi	Iran	Landrace
79	ICC 4841	Kabuli	Morocco	Landrace
80	ICC 4853	Kabuli	Unknown	Landrace
81	ICC 4872	Desi	India	Landrace
82	ICC 4918	Desi	India	Advanced cultivar
83	ICC 4991	Desi	India	Advanced cultivar
84	ICC 5135	Desi	India	Breeding material
85	ICC 5221	Desi	India	Breeding material
86	ICC 5337	Kabuli	India	Landrace
87	ICC 5383	Desi	India	Landrace
88	ICC 5434	Desi	India	Landrace
89	ICC 5504	Desi	Mexico	Landrace
90	ICC 5613	Desi	India	Landrace
91	ICC 5639	Desi	India	Landrace
92	ICC 5845	Desi	India	Landrace
93	ICC 5878	Desi	India	Landrace
94	ICC 5879	Kabuli	India	Landrace
95	ICC 6263	Kabuli	Union of Soviet Socialist Republics	Landrace
96	ICC 6279	Desi	India	Landrace
97	ICC 6293	Desi	Italy	Landrace
98	ICC 6294	Desi	Iran	Advanced cultivar
99	ICC 6306	Desi	Union of Soviet Socialist Republics	Advanced cultivar
100	ICC 6537	Desi	Iran	Breeding material
101	ICC 6571	Desi	Iran	Landrace
102	ICC 6579	Desi	Iran	Landrace
103	ICC 6802	Desi	Iran	Landrace
104	ICC 6811	Desi	Iran	Landrace
105	ICC 6816	Desi	Iran	Landrace
106	ICC 6874	Desi	Iran	Landrace
107	ICC 6875	Desi	Iran	Landrace
108	ICC 6877	Desi	Iran	Landrace
109	ICC 7052	Desi	Iran	Landrace
110	ICC 7150	Desi	Turkey	Landrace
111	ICC 7184	Desi	Turkey	Landrace
112	ICC 7255	Kabuli	India	Landrace
113	ICC 7272	Kabuli	Algeria	Landrace
114	ICC 7305	Desi	Afghanistan	Landrace
115	ICC 7308	Kabuli	Peru	Landrace
116	ICC 7315	Kabuli	Iran	Landrace
117	ICC 7323	Kabuli	Union of Soviet Socialist Republics	Landrace
118	ICC 7326	Desi	Unknown	Landrace
119	ICC 7413	Desi	India	Landrace
120	ICC 7441	Desi	India	Landrace
121	ICC 7554	Desi	Iran	Landrace
122	ICC 7571	Kabuli	Isreal	Landrace
123	ICC 7668	Kabuli	Union of Soviet Socialist Republics	Landrace
124	ICC 7819	Desi	Iran	Landrace
125	ICC 7867	Desi	Iran	Landrace
126	ICC 8058	Kabuli	Iran	Landrace
127	ICC 8151	Kabuli	USA	Landrace
128	ICC 8195	Desi	Pakistan	Landrace
129	ICC 8200	Desi	Iran	Landrace
130	ICC 8261	Kabuli	Turkey	Landrace
131	ICC 8318	Desi	India	Landrace
132	ICC 8350	Desi	India	Landrace
133	ICC 8384	Desi	India	Landrace
134	ICC 8515	Desi	Greece	Landrace
135	ICC 8521	Desi	Italy	Landrace
136	ICC 8522	Desi	Italy	Landrace
137	ICC 8607	Desi	Ethiopia	Landrace
138	ICC 8621	Desi	Ethiopia	Landrace
139	ICC 8718	Desi	Afghanistan	Landrace
140	ICC 8740	Kabuli	Afghanistan	Landrace
141	ICC 8752	Kabuli	Afghanistan	Landrace
142	ICC 8855	Kabuli	Afghanistan	Landrace
143	ICC 8950	Desi	India	Landrace
144	ICC 9002	Desi	Iran	Landrace
145	ICC 9137	Kabuli	Iran	Landrace
146	ICC 9402	Kabuli	Iran	Landrace
147	ICC 9418	Kabuli	Iran	Landrace
148	ICC 9434	Kabuli	Iran	Landrace
149	ICC 9586	Desi	India	Landrace
150	ICC 9590	Desi	Egypt	Landrace
151	ICC 9636	Desi	Afghanistan	Landrace
152	ICC 9643	Desi	Afghanistan	Landrace
153	ICC 9702	Desi	Afghanistan	Landrace
154	ICC 9712	Desi	Afghanistan	Landrace
155	ICC 9755	Desi	Afghanistan	Landrace
156	ICC 9848	Desi	Afghanistan	Landrace
157	ICC 9862	Desi	Afghanistan	Landrace
158	ICC 9872	Desi	Afghanistan	Landrace
159	ICC 9895	Desi	Afghanistan	Landrace
160	ICC 9942	Desi	India	Landrace
161	ICC 10018	Desi	India	Landrace
162	ICC 10341	Kabuli	Turkey	Landrace
163	ICC 10393	Desi	India	Landrace
164	ICC 10399	Desi	India	Landrace
165	ICC 10466	Kabuli	India	Landrace
166	ICC 10673	Desi	Turkey	Landrace
167	ICC 10685	Desi	Turkey	Landrace
168	ICC 10755	Kabuli	Turkey	Landrace
169	ICC 10885	Kabuli	Ethiopia	Landrace
170	ICC 10939	Desi	India	Landrace
171	ICC 10945	Desi	India	Landrace
172	ICC 11121	Desi	India	Landrace
173	ICC 11198	Desi	India	Landrace
174	ICC 11279	Desi	Pakistan	Landrace
175	ICC 11284	Kabuli	Union of Soviet Socialist Republics	Landrace
176	ICC 11303	Kabuli	Chile	Landrace
177	ICC 11378	Desi	India	Landrace
178	ICC 11498	Desi	India	Breeding material
179	ICC 11584	Desi	India	Landrace
180	ICC 11627	Desi	India	Landrace
181	ICC 11664	Desi	India	Landrace
182	ICC 11764	Kabuli	Chile	Landrace
183	ICC 11879	Kabuli	Turkey	Landrace
184	ICC 11903	Desi	Germany	Landrace
185	ICC 11944	Desi	Nepal	Landrace
186	ICC 12028	Desi	Mexico	Landrace
187	ICC 12037	Desi	Mexico	Breeding material
188	ICC 12155	Desi	Bangladesh	Landrace
189	ICC 12299	Desi	Nepal	Landrace
190	ICC 12307	Desi	Myanmar	Landrace
191	ICC 12324	Kabuli	Unknown	Advanced cultivar
192	ICC 12328	Kabuli	Cyprus	Landrace
193	ICC 12379	Desi	Iran	Landrace
194	ICC 12492	Kabuli	India	Landrace
195	ICC 12537	Desi	Ethiopia	Landrace
196	ICC 12654	Desi	Ethiopia	Landrace
197	ICC 12726	Desi	Ethiopia	Landrace
198	ICC 12824	Desi	Ethiopia	Landrace
199	ICC 12851	Desi	Ethiopia	Landrace
200	ICC 12866	Desi	Ethiopia	Landrace
201	ICC 12916	Desi	India	Landrace
202	ICC 12928	Desi	India	Landrace
203	ICC 12947	Desi	India	Landrace
204	ICC 13077	Kabuli	India	Landrace
205	ICC 13124	Desi	India	Landrace
206	ICC 13187	Kabuli	Iran	Breeding material
207	ICC 13219	Desi	Iran	Landrace
208	ICC 13283	Kabuli	Iran	Landrace
209	ICC 13357	Kabuli	Iran	Landrace
210	ICC 13441	Kabuli	Iran	Landrace
211	ICC 13461	Kabuli	Iran	Landrace
212	ICC 13523	Kabuli	Iran	Landrace
213	ICC 13524	Desi	Iran	Landrace
214	ICC 13599	Kabuli	Iran	Landrace
215	ICC 13628	Kabuli	Iran	Landrace
216	ICC 13719	Kabuli	Iran	Landrace
217	ICC 13764	Kabuli	Iran	Landrace
218	ICC 13816	Kabuli	Union of Soviet Socialist Republics	Landrace
219	ICC 13863	Desi	Ethiopia	Landrace
220	ICC 13892	Desi	Ethiopia	Landrace
221	ICC 14051	Desi	Ethiopia	Landrace
222	ICC 14077	Desi	Ethiopia	Landrace
223	ICC 14098	Desi	Ethiopia	Landrace
224	ICC 14199	Kabuli	Mexico	Breeding material
225	ICC 14402	Desi	India	Breeding material
226	ICC 14595	Desi	India	Landrace
227	ICC 14669	Desi	India	Landrace
228	ICC 14778	Desi	India	Landrace
229	ICC 14799	Desi	India	Landrace
230	ICC 14815	Desi	India	Landrace
231	ICC 14831	Desi	India	Landrace
232	ICC 15248	Desi	Iran	Landrace
233	ICC 15264	Kabuli	Iran	Landrace
234	ICC 15294	Desi	Iran	Landrace
235	ICC 15333	Kabuli	Iran	Landrace
236	ICC 15406	Kabuli	Morocco	Landrace
237	ICC 15435	Kabuli	Morocco	Landrace
238	ICC 15510	Desi	Morocco	Landrace
239	ICC 15518	Kabuli	Morocco	Landrace
240	ICC 15567	Desi	India	Breeding material
241	ICC 15606	Desi	India	Landrace
242	ICC 15610	Desi	India	Landrace
243	ICC 15612	Desi	Tanzania	Landrace
244	ICC 15614	Desi	Tanzania	Landrace
245	ICC 15618	Desi	India	Landrace
246	ICC 15697	Kabuli	Syria	Landrace
247	ICC 15762	Desi	Syria	Landrace
248	ICC 15785	Desi	Syria	Landrace
249	ICC 15802	Kabuli	Syria	Landrace
250	ICC 15868	Desi	India	Landrace
251	ICC 15888	Kabuli	India	Landrace
252	ICC 16207	Desi	Myanmar	Landrace
253	ICC 16261	Desi	Malawi	Landrace
254	ICC 16269	Desi	Malawi	Landrace
255	ICC 16374	Desi	Malawi	Breeding material
256	ICC 16487	Desi	Pakistan	Landrace
257	ICC 16524	Desi	Pakistan	Landrace
258	ICC 16654	Kabuli	China	Landrace
259	ICC 16796	Kabuli	Portugal	Landrace
260	ICC 16903	Desi	India	Landrace
261	ICC 16915	Desi	India	Landrace
262	ICC 18679	Kabuli	Iraq	Traditional cultivar/Landrace
263	ICC 18699	Kabuli	Turkey	Traditional cultivar/Landrace
264	ICC 18720	Kabuli	Morocco	Traditional cultivar/Landrace
265	ICC 18828	Kabuli	Syria	Traditional cultivar/Landrace
266	ICC 18836	Kabuli	Syria	Unknown
267	ICC 18839	Kabuli	Syria	Unknown
268	ICC 18847	Kabuli	Syria	Unknown
269	ICC 18858	Kabuli	Syria	Unknown
270	ICC 18912	Kabuli	Cyprus	Traditional cultivar/Landrace
271	ICC 19095	Kabuli	Turkey	Traditional cultivar/Landrace
272	ICC 19100	Kabuli	Turkey	Traditional cultivar/Landrace
273	ICC 19169	Kabuli	Syria	Landrace
274	ICC 20259	Kabuli	Iran	Traditional cultivar/Landrace
275	ICC 20260	Desi	Afghanistan	Traditional cultivar/Landrace
276	ICC 20261	Kabuli	Turkey	Traditional cultivar/Landrace
277	ICC 20262	Kabuli	Sudan	Traditional cultivar/Landrace
278	ICC 20263	Kabuli	Iran	Traditional cultivar/Landrace
279	ICC 20265	Kabuli	Afghanistan	Traditional cultivar/Landrace
280	ICC 20267	Kabuli	India	Breeding material

## Sheet: kinship matrix
Supplementary Table S2. Kinship matrix among the accessions by GAPIT software
	ICC67	ICC95	ICC283	ICC440	ICC456	ICC506	ICC637	ICC672	ICC708	ICC762	ICC791	ICC867	ICC1052	ICC1083	ICC1098	ICC1161	ICC1164	ICC1180	ICC1194	ICC1205	ICC1230	ICC1356	ICC1392	ICC1397	ICC1398	ICC1422	ICC1431	ICC1510	ICC1710	ICC1715	ICC1882	ICC1915	ICC1923	ICC2065	ICC2072	ICC2210	ICC2242	ICC2263	ICC2277	ICC2482	ICC2507	ICC2580	ICC2593	ICC2629	ICC2679	ICC2720	ICC2737	ICC2884	ICC2919
ICC67	1.01813	0.555877	0.264172	0.262155	0.364562	0.126036	0.286456	0.296904	0.348139	0.33147	0.354185	0.75147	0.119887	0.346974	0.448852	0.21204	0.119584	0.244415	0.360958	-0.322456	0.273623	0.147301	0.162911	0.265876	0.352585	0.213432	0.567767	0.220515	0.240088	0.213263	0.470034	-0.244019	0.611356	0.235424	0.661446	0.330861	0.31951	0.342734	-0.254118	-0.275506	-0.0851683	0.346309	-0.34927	0.303894	-0.0167317	0.28423	-0.0980262	0.00187326	-0.260796
ICC95	0.555877	1.19814	0.581792	0.420054	0.511536	0.227226	0.450079	0.325259	0.299494	0.45087	0.596367	0.657563	0.0613577	0.39978	0.64369	0.221665	0.0678183	0.443936	0.415845	-0.528219	0.480947	0.311444	0.382201	0.401925	0.360649	0.442607	0.568548	0.400786	0.291854	0.258786	0.526483	-0.250002	0.536698	0.430782	0.632571	0.296263	0.309885	0.619773	-0.345424	-0.306982	-0.202487	0.411601	-0.377624	0.529428	-0.147057	0.328192	-0.22419	-0.0852705	-0.437424
ICC283	0.264172	0.581792	1.18234	0.312521	0.27706	0.206578	0.498624	0.355595	0.101436	0.255413	0.475828	0.447018	0.10314	0.310457	0.477888	0.22755	0.154343	0.451901	0.419129	-0.463545	0.348962	0.364672	0.391727	0.524868	0.371216	0.478147	0.445407	0.404589	0.350285	0.331784	0.423633	-0.0922012	0.525414	0.340419	0.356474	0.228791	0.289756	0.654792	-0.267743	-0.32711	-0.0337609	0.137065	-0.27393	0.415132	-0.142213	0.296098	-0.0497404	0.0355918	-0.359224
ICC440	0.262155	0.420054	0.312521	0.930135	0.303657	0.153054	0.452384	0.253167	0.151965	0.489074	0.626767	0.414305	0.048576	0.322486	0.366095	0.265072	0.195507	0.239698	0.369247	-0.172136	0.474928	0.323114	0.356933	0.32411	0.348908	0.363232	0.275345	0.446793	0.458563	0.399481	0.285306	-0.226365	0.264826	0.707786	0.332085	0.494187	0.522376	0.44519	-0.305659	-0.267217	-0.224634	0.349395	-0.323292	0.720588	-0.154116	0.454321	-0.236451	-0.141754	-0.295688
ICC456	0.364562	0.511536	0.27706	0.303657	1.63908	0.206557	0.235872	0.287421	0.13003	0.23042	0.591305	0.518274	-0.0248645	0.196499	0.652156	0.119835	0.315604	0.423266	0.188632	-0.286677	0.375475	0.0883927	0.433848	0.286048	0.174537	0.242448	0.647248	0.315084	0.254536	0.201178	0.574488	-0.402818	0.572217	0.432484	0.731562	0.304208	0.302742	0.359783	-0.295337	0.0334104	-0.313682	0.369602	0.010112	0.405226	-0.166686	0.232606	-0.32706	-0.214674	-0.298373
ICC506	0.126036	0.227226	0.206578	0.153054	0.206557	1.25152	0.343839	0.0879134	0.0918042	0.117277	0.167565	0.110142	-0.0807796	0.160874	0.0629724	0.0384272	0.0583476	0.440708	0.109305	-0.1605	0.168164	0.337871	0.141214	0.410143	0.199783	0.361861	-0.0423452	0.117657	0.01705	0.0880341	-0.0459109	-0.315141	-0.00708081	0.201241	0.0263609	0.0630802	0.0917893	0.358496	0.0280183	-0.0209439	-0.251498	-0.162873	-0.13997	0.190632	-0.247053	0.199062	-0.264356	-0.180064	-0.161271
ICC637	0.286456	0.450079	0.498624	0.452384	0.235872	0.343839	1.28049	0.524593	0.0597282	0.374466	0.664075	0.431843	0.0442634	0.316613	0.360222	0.456377	0.332706	0.370653	0.445054	-0.513057	0.404543	0.468637	0.359904	0.70219	0.384656	0.313657	0.421908	0.571506	0.637382	0.615239	0.248737	-0.208307	0.365086	0.787756	0.431825	0.632426	0.69027	0.658867	-0.354194	-0.195572	-0.193569	0.289414	-0.17985	0.620028	-0.128253	0.595681	-0.194981	-0.0976825	-0.301042
ICC672	0.296904	0.325259	0.355595	0.253167	0.287421	0.0879134	0.524593	1.02513	0.0847435	0.295429	0.492432	0.432927	0.182696	0.341108	0.324887	0.497521	0.391538	0.192246	0.386828	-0.413124	0.366606	0.315723	0.281387	0.470196	0.436725	0.212769	0.44068	0.372809	0.604128	0.593431	0.297164	-0.131786	0.553984	0.410609	0.511988	0.506566	0.481168	0.403461	-0.211079	-0.0873144	0.0541187	0.423164	-0.173564	0.383872	0.13244	0.399065	0.0521863	0.11983	-0.236486
ICC708	0.348139	0.299494	0.101436	0.151965	0.13003	0.0918042	0.0597282	0.0847435	0.760812	0.256138	0.160754	0.359819	-0.0204775	0.121286	0.216401	0.0935266	0.0406104	0.0660717	0.154	-0.0341251	0.0822722	0.186947	-0.0279191	0.0937756	0.186207	0.144863	0.210454	0.0967987	0.0820344	0.0807022	0.21209	-0.243393	0.287859	0.0206621	0.271356	0.0547077	0.055843	0.0483716	-0.00584705	-0.322224	-0.213567	0.150276	-0.335117	0.134395	-0.175306	0.100684	-0.228506	-0.147856	-0.117098
ICC762	0.33147	0.45087	0.255413	0.489074	0.23042	0.117277	0.374466	0.295429	0.256138	0.928295	0.57174	0.493505	0.0741896	0.381397	0.324595	0.291206	0.261181	0.201319	0.435961	-0.216757	0.435509	0.347167	0.304508	0.240989	0.407298	0.303523	0.378998	0.310606	0.522155	0.491688	0.349939	-0.362553	0.353392	0.566396	0.398279	0.466734	0.48868	0.32409	-0.206168	-0.350338	-0.217229	0.568546	-0.41942	0.611454	-0.14411	0.415422	-0.226445	-0.130188	-0.227413
ICC791	0.354185	0.596367	0.475828	0.626767	0.591305	0.167565	0.664075	0.492432	0.160754	0.57174	1.44196	0.531828	0.0812967	0.486313	0.555935	0.487168	0.433211	0.362944	0.588741	-0.421397	0.623667	0.518157	0.62169	0.467647	0.608463	0.388149	0.571838	0.673572	0.700949	0.64759	0.467862	-0.376256	0.486922	0.844559	0.724306	0.659575	0.687764	0.705265	-0.468036	-0.319819	-0.233014	0.552761	-0.390461	0.870888	-0.126598	0.574965	-0.240669	-0.119959	-0.385749
ICC867	0.75147	0.657563	0.447018	0.414305	0.518274	0.110142	0.431843	0.432927	0.359819	0.493505	0.531828	1.37862	0.152898	0.422646	0.721703	0.376677	0.325842	0.279507	0.535479	-0.386214	0.355538	0.174069	0.25263	0.417506	0.5526	0.270895	0.790673	0.434577	0.531669	0.504323	0.815202	-0.371249	0.914382	0.439081	0.907764	0.517348	0.519524	0.507891	-0.318916	-0.385567	-0.129677	0.713327	-0.449446	0.4857	-0.0357472	0.431178	-0.139933	-0.028588	-0.333398
ICC1052	0.119887	0.0613577	0.10314	0.048576	-0.0248645	-0.0807796	0.0442634	0.182696	-0.0204775	0.0741896	0.0812967	0.152898	0.82457	0.0933352	0.0474593	0.176391	0.0896581	0.0141886	0.171832	-0.177054	0.0407944	0.0216469	0.000838311	0.0127579	0.142128	0.020664	0.154408	0.0246254	0.178426	0.0954126	0.14564	0.0012731	0.188112	0.0530614	0.178372	0.244746	0.205821	0.0651631	-0.0775001	0.0806018	0.755823	0.100994	0.0781139	0.0252832	0.301397	0.163779	0.756492	0.65453	0.0386037
ICC1083	0.346974	0.39978	0.310457	0.322486	0.196499	0.160874	0.316613	0.341108	0.121286	0.381397	0.486313	0.422646	0.0933352	1.38644	0.569534	0.271332	0.238706	0.279254	0.587773	-0.386467	0.566511	0.237808	0.462563	0.313722	0.59813	0.674365	0.304496	0.285009	0.447654	0.391694	0.555859	-0.356414	0.447455	0.488773	0.437715	0.491603	0.51615	0.499834	-0.094416	-0.302578	-0.0721804	0.430052	-0.328478	0.492731	0.0462014	0.401791	-0.0782749	0.0221449	-0.1141
ICC1098	0.448852	0.64369	0.477888	0.366095	0.652156	0.0629724	0.360222	0.324887	0.216401	0.324595	0.555935	0.721703	0.0474593	0.569534	1.38157	0.152099	0.131959	0.265635	0.40715	-0.46616	0.462886	0.342808	0.448423	0.426005	0.4045	0.581666	0.53644	0.380124	0.369001	0.217314	0.88301	-0.258698	0.757958	0.506369	0.63324	0.329709	0.386512	0.540322	-0.174629	-0.229314	-0.130022	0.603727	-0.172492	0.498881	-0.0974837	0.333023	-0.117387	-0.0513049	-0.295765
ICC1161	0.21204	0.221665	0.22755	0.265072	0.119835	0.0384272	0.456377	0.497521	0.0935266	0.291206	0.487168	0.376677	0.176391	0.271332	0.152099	1.24039	0.399801	0.106342	0.296761	-0.20196	0.412328	0.263115	0.34792	0.432156	0.412731	0.092527	0.370384	0.654209	0.530189	0.508567	0.173281	0.0528459	0.353622	0.372049	0.469785	0.47841	0.492552	0.382589	-0.1716	-0.162293	0.0504155	0.395529	-0.347393	0.346872	-0.0590772	0.39172	0.0359968	0.109363	-0.253716
ICC1164	0.119584	0.0678183	0.154343	0.195507	0.315604	0.0583476	0.332706	0.391538	0.0406104	0.261181	0.433211	0.325842	0.0896581	0.238706	0.131959	0.399801	1.31145	0.169444	0.488368	-0.152905	0.159111	0.246617	0.0624466	0.239289	0.543467	0.00839511	0.287813	0.350526	0.634913	0.498312	0.305578	-0.433448	0.332442	0.356591	0.318019	0.465034	0.509871	0.210013	0.0122023	-0.0752592	-0.0357974	0.474759	-0.0704635	0.351184	-0.0937842	0.369499	-0.0408514	0.0117043	0.188136
ICC1180	0.244415	0.443936	0.451901	0.239698	0.423266	0.440708	0.370653	0.192246	0.0660717	0.201319	0.362944	0.279507	0.0141886	0.279254	0.265635	0.106342	0.169444	1.03669	0.21728	-0.310575	0.276138	0.130567	0.360525	0.336026	0.170408	0.284102	0.260727	0.213666	0.138031	0.112247	0.192649	-0.198842	0.174251	0.304013	0.197287	0.222561	0.253351	0.468552	-0.0721116	-0.00557577	-0.171617	0.0325055	-0.0897448	0.28664	-0.109424	0.262294	-0.183955	-0.0934201	-0.203132
ICC1194	0.360958	0.415845	0.419129	0.369247	0.188632	0.109305	0.445054	0.386828	0.154	0.435961	0.588741	0.535479	0.171832	0.587773	0.40715	0.296761	0.488368	0.21728	1.14127	-0.402138	0.449909	0.297575	0.351684	0.450487	0.705761	0.497933	0.445944	0.320844	0.589102	0.543027	0.526661	-0.395497	0.502019	0.473102	0.560433	0.507147	0.521289	0.473238	-0.25524	-0.341141	-0.00252852	0.540284	-0.403459	0.546775	0.0627866	0.425139	-0.0133054	0.0735876	-0.105319
ICC1205	-0.322456	-0.528219	-0.463545	-0.172136	-0.286677	-0.1605	-0.513057	-0.413124	-0.0341251	-0.216757	-0.421397	-0.386214	-0.177054	-0.386467	-0.46616	-0.20196	-0.152905	-0.310575	-0.402138	1.44708	-0.371373	-0.116863	-0.299473	-0.368194	-0.322066	-0.349883	-0.418	-0.202329	-0.342477	-0.232993	-0.373702	0.030287	-0.49043	-0.353384	-0.504332	-0.348993	-0.339013	-0.51713	0.226212	-0.113576	-0.138627	-0.213364	-0.071322	-0.305724	-0.157594	-0.310821	-0.155127	-0.170725	0.149299
ICC1230	0.273623	0.480947	0.348962	0.474928	0.375475	0.168164	0.404543	0.366606	0.0822722	0.435509	0.623667	0.355538	0.0407944	0.566511	0.462886	0.412328	0.159111	0.276138	0.449909	-0.371373	1.34223	0.25082	0.94381	0.352747	0.462347	0.534941	0.32115	0.556591	0.387309	0.311059	0.219255	-0.0910752	0.36734	0.526237	0.439802	0.426576	0.376725	0.551866	-0.321244	-0.115278	-0.290164	0.508617	-0.252514	0.635288	-0.0131028	0.335723	-0.299901	-0.161502	-0.410644
ICC1356	0.147301	0.311444	0.364672	0.323114	0.0883927	0.337871	0.468637	0.315723	0.186947	0.347167	0.518157	0.174069	0.0216469	0.237808	0.342808	0.263115	0.246617	0.130567	0.297575	-0.116863	0.25082	1.2415	0.146352	0.59321	0.481179	0.438274	0.109506	0.368358	0.455045	0.383478	0.180858	-0.221038	0.255586	0.400957	0.148557	0.301295	0.344051	0.369876	-0.00118142	-0.362821	-0.16728	0.244947	-0.353863	0.427806	-0.255963	0.38421	-0.187942	-0.10157	-0.223768
ICC1392	0.162911	0.382201	0.391727	0.356933	0.433848	0.141214	0.359904	0.281387	-0.0279191	0.304508	0.62169	0.25263	0.000838311	0.462563	0.448423	0.34792	0.0624466	0.360525	0.351684	-0.299473	0.94381	0.146352	1.66864	0.348689	0.385453	0.384169	0.567858	0.636815	0.286482	0.348622	0.288034	0.0411753	0.315418	0.494085	0.546039	0.344999	0.292547	0.654461	-0.228534	-0.176045	-0.16988	0.543059	-0.33253	0.558393	-0.127977	0.234376	-0.161927	-0.0989664	-0.575463
ICC1397	0.265876	0.401925	0.524868	0.32411	0.286048	0.410143	0.70219	0.470196	0.0937756	0.240989	0.467647	0.417506	0.0127579	0.313722	0.426005	0.432156	0.239289	0.336026	0.450487	-0.368194	0.352747	0.59321	0.348689	1.49582	0.594031	0.559971	0.260337	0.645093	0.461244	0.49685	0.327007	-0.220042	0.441275	0.435769	0.376907	0.303331	0.367939	0.629963	-0.289451	-0.170889	-0.198541	0.185072	-0.283152	0.4262	-0.113976	0.345666	-0.200993	-0.103695	-0.35856
ICC1398	0.352585	0.360649	0.371216	0.348908	0.174537	0.199783	0.384656	0.436725	0.186207	0.407298	0.608463	0.5526	0.142128	0.59813	0.4045	0.412731	0.543467	0.170408	0.705761	-0.322066	0.462347	0.481179	0.385453	0.594031	1.25719	0.523898	0.426126	0.435253	0.64212	0.540377	0.509964	-0.478787	0.569085	0.390332	0.583277	0.559125	0.556619	0.552789	-0.109095	-0.312575	-0.0702108	0.515784	-0.462817	0.508227	0.0346442	0.454226	-0.0820282	0.027236	-0.236473
ICC1422	0.213432	0.442607	0.478147	0.363232	0.242448	0.361861	0.313657	0.212769	0.144863	0.303523	0.388149	0.270895	0.020664	0.674365	0.581666	0.092527	0.00839511	0.284102	0.497933	-0.349883	0.534941	0.438274	0.384169	0.559971	0.523898	1.21976	0.0986382	0.293498	0.214222	0.227457	0.344798	-0.241791	0.266049	0.424946	0.170466	0.25713	0.237975	0.485432	-0.104136	-0.222813	-0.165662	0.184134	-0.257037	0.44191	-0.144049	0.276573	-0.175919	-0.0754989	-0.207062
ICC1431	0.567767	0.568548	0.445407	0.275345	0.647248	-0.0423452	0.421908	0.44068	0.210454	0.378998	0.571838	0.790673	0.154408	0.304496	0.53644	0.370384	0.287813	0.260727	0.445944	-0.418	0.32115	0.109506	0.567858	0.260337	0.426126	0.0986382	1.57778	0.376777	0.502484	0.543813	0.766767	-0.243835	0.902886	0.453077	1.19906	0.557879	0.523636	0.494314	-0.362668	-0.486548	-0.0397216	0.67946	-0.427645	0.430502	-0.0503647	0.381183	-0.0499782	0.0410768	-0.452068
ICC1510	0.220515	0.400786	0.404589	0.446793	0.315084	0.117657	0.571506	0.372809	0.0967987	0.310606	0.673572	0.434577	0.0246254	0.285009	0.380124	0.654209	0.350526	0.213666	0.320844	-0.202329	0.556591	0.368358	0.636815	0.645093	0.435253	0.293498	0.376777	1.37908	0.436693	0.447847	0.247829	-0.0588598	0.369901	0.498102	0.490226	0.413008	0.417785	0.639749	-0.392041	-0.164224	-0.229335	0.361342	-0.344641	0.556688	-0.253505	0.362216	-0.23751	-0.129807	-0.299349
ICC1710	0.240088	0.291854	0.350285	0.458563	0.254536	0.01705	0.637382	0.604128	0.0820344	0.522155	0.700949	0.531669	0.178426	0.447654	0.369001	0.530189	0.634913	0.138031	0.589102	-0.342477	0.387309	0.455045	0.286482	0.461244	0.64212	0.214222	0.502484	0.436693	1.38962	1.03503	0.619098	-0.512725	0.550234	0.820468	0.586277	0.86804	0.920681	0.473069	-0.203903	-0.414146	-0.0287107	0.765389	-0.415594	0.699042	0.0168345	0.695506	-0.0332444	0.0364799	-0.114853
ICC1715	0.213263	0.258786	0.331784	0.399481	0.201178	0.0880341	0.615239	0.593431	0.0807022	0.491688	0.64759	0.504323	0.0954126	0.391694	0.217314	0.508567	0.498312	0.112247	0.543027	-0.232993	0.311059	0.383478	0.348622	0.49685	0.540377	0.227457	0.543813	0.447847	1.03503	1.4395	0.441918	-0.454747	0.514565	0.741096	0.582864	0.685657	0.720609	0.435838	-0.263505	-0.453458	-0.0961161	0.669889	-0.467912	0.631637	-0.0224768	0.572953	-0.108454	-0.0283242	-0.167691
ICC1882	0.470034	0.526483	0.423633	0.285306	0.574488	-0.0459109	0.248737	0.297164	0.21209	0.349939	0.467862	0.815202	0.14564	0.555859	0.88301	0.173281	0.305578	0.192649	0.526661	-0.373702	0.219255	0.180858	0.288034	0.327007	0.509964	0.344798	0.766767	0.247829	0.619098	0.441918	1.56805	-0.401398	0.969036	0.496856	0.790211	0.506449	0.577299	0.469938	-0.157089	-0.524971	0.0430761	0.740407	-0.444218	0.425896	-0.0112689	0.397907	0.0588326	0.0895373	-0.21007
ICC1915	-0.244019	-0.250002	-0.0922012	-0.226365	-0.402818	-0.315141	-0.208307	-0.131786	-0.243393	-0.362553	-0.376256	-0.371249	0.0012731	-0.356414	-0.258698	0.0528459	-0.433448	-0.198842	-0.395497	0.030287	-0.0910752	-0.221038	0.0411753	-0.220042	-0.478787	-0.241791	-0.243835	-0.0588598	-0.512725	-0.454747	-0.401398	1.98531	-0.373494	-0.351945	-0.408726	-0.33871	-0.441107	-0.198333	-0.0678585	0.205221	0.251967	-0.464773	0.108046	-0.364116	0.0186517	-0.348402	0.266162	0.191254	-0.0193887
ICC1923	0.611356	0.536698	0.525414	0.264826	0.572217	-0.00708081	0.365086	0.553984	0.287859	0.353392	0.486922	0.914382	0.188112	0.447455	0.757958	0.353622	0.332442	0.174251	0.502019	-0.49043	0.36734	0.255586	0.315418	0.441275	0.569085	0.266049	0.902886	0.369901	0.550234	0.514565	0.969036	-0.373494	1.55414	0.34475	1.04079	0.476604	0.455889	0.445816	-0.275898	-0.38313	0.0231167	0.732413	-0.299774	0.435591	0.0785468	0.350374	0.0196235	0.0914288	-0.321075
ICC2065	0.235424	0.430782	0.340419	0.707786	0.432484	0.201241	0.787756	0.410609	0.0206621	0.566396	0.844559	0.439081	0.0530614	0.488773	0.506369	0.372049	0.356591	0.304013	0.473102	-0.353384	0.526237	0.400957	0.494085	0.435769	0.390332	0.424946	0.453077	0.498102	0.820468	0.741096	0.496856	-0.351945	0.34475	1.4911	0.479122	0.905517	1.03464	0.588585	-0.394821	-0.303312	-0.201939	0.613491	-0.269382	0.97636	-0.100726	0.783449	-0.196068	-0.129465	-0.299007
ICC2072	0.661446	0.632571	0.356474	0.332085	0.731562	0.0263609	0.431825	0.511988	0.271356	0.398279	0.724306	0.907764	0.178372	0.437715	0.63324	0.469785	0.318019	0.197287	0.560433	-0.504332	0.439802	0.148557	0.546039	0.376907	0.583277	0.170466	1.19906	0.490226	0.586277	0.582864	0.790211	-0.408726	1.04079	0.479122	1.63247	0.622423	0.581417	0.574466	-0.451602	-0.328877	-0.0272038	0.787706	-0.395878	0.478918	0.0760904	0.419194	-0.0176904	0.0619189	-0.453597
ICC2210	0.330861	0.296263	0.228791	0.494187	0.304208	0.0630802	0.632426	0.506566	0.0547077	0.466734	0.659575	0.517348	0.244746	0.491603	0.329709	0.47841	0.465034	0.222561	0.507147	-0.348993	0.426576	0.301295	0.344999	0.303331	0.559125	0.25713	0.557879	0.413008	0.86804	0.685657	0.506449	-0.33871	0.476604	0.905517	0.622423	1.31155	1.07701	0.466552	-0.218223	-0.253138	0.0631025	0.521113	-0.287883	0.627493	0.11333	0.803968	0.0575282	0.114766	-0.18328
ICC2242	0.31951	0.309885	0.289756	0.522376	0.302742	0.0917893	0.69027	0.481168	0.055843	0.48868	0.687764	0.519524	0.205821	0.51615	0.386512	0.492552	0.509871	0.253351	0.521289	-0.339013	0.376725	0.344051	0.292547	0.367939	0.556619	0.237975	0.523636	0.417785	0.920681	0.720609	0.577299	-0.441107	0.455889	1.03464	0.581417	1.07701	1.30654	0.49266	-0.211885	-0.318597	-0.0101596	0.550342	-0.315882	0.675972	0.129553	0.87898	-0.0115718	0.0503486	-0.15197
ICC2263	0.342734	0.619773	0.654792	0.44519	0.359783	0.358496	0.658867	0.403461	0.0483716	0.32409	0.705265	0.507891	0.0651631	0.499834	0.540322	0.382589	0.210013	0.468552	0.473238	-0.51713	0.551866	0.369876	0.654461	0.629963	0.552789	0.485432	0.494314	0.639749	0.473069	0.435838	0.469938	-0.198333	0.445816	0.588585	0.574466	0.466552	0.49266	1.26142	-0.433184	-0.220455	-0.167987	0.293666	-0.367576	0.58734	-0.149495	0.457901	-0.176682	-0.0575332	-0.512699
ICC2277	-0.254118	-0.345424	-0.267743	-0.305659	-0.295337	0.0280183	-0.354194	-0.211079	-0.00584705	-0.206168	-0.468036	-0.318916	-0.0775001	-0.094416	-0.174629	-0.1716	0.0122023	-0.0721116	-0.25524	0.226212	-0.321244	-0.00118142	-0.228534	-0.289451	-0.109095	-0.104136	-0.362668	-0.392041	-0.203903	-0.263505	-0.157089	-0.0678585	-0.275898	-0.394821	-0.451602	-0.218223	-0.211885	-0.433184	1.69665	0.0614153	0.0478105	-0.253241	0.149973	-0.433004	-0.071047	-0.188895	0.0672088	0.00894882	0.387762
ICC2482	-0.275506	-0.306982	-0.32711	-0.267217	0.0334104	-0.0209439	-0.195572	-0.0873144	-0.322224	-0.350338	-0.319819	-0.385567	0.0806018	-0.302578	-0.229314	-0.162293	-0.0752592	-0.00557577	-0.341141	-0.113576	-0.115278	-0.362821	-0.176045	-0.170889	-0.312575	-0.222813	-0.486548	-0.164224	-0.414146	-0.453458	-0.524971	0.205221	-0.38313	-0.303312	-0.328877	-0.253138	-0.318597	-0.220455	0.0614153	1.55555	0.265742	-0.389087	1.07442	-0.362306	0.57506	-0.266472	0.293465	0.182659	0.354928
ICC2507	-0.0851683	-0.202487	-0.0337609	-0.224634	-0.313682	-0.251498	-0.193569	0.0541187	-0.213567	-0.217229	-0.233014	-0.129677	0.755823	-0.0721804	-0.130022	0.0504155	-0.0357974	-0.171617	-0.00252852	-0.138627	-0.290164	-0.16728	-0.16988	-0.198541	-0.0702108	-0.165662	-0.0397216	-0.229335	-0.0287107	-0.0961161	0.0430761	0.251967	0.0231167	-0.201939	-0.0272038	0.0631025	-0.0101596	-0.167987	0.0478105	0.265742	1.48672	-0.047873	0.328807	-0.316081	0.47145	-0.0329527	1.45617	1.15339	0.240393
ICC2580	0.346309	0.411601	0.137065	0.349395	0.369602	-0.162873	0.289414	0.423164	0.150276	0.568546	0.552761	0.713327	0.100994	0.430052	0.603727	0.395529	0.474759	0.0325055	0.540284	-0.213364	0.508617	0.244947	0.543059	0.185072	0.515784	0.184134	0.67946	0.361342	0.765389	0.669889	0.740407	-0.464773	0.732413	0.613491	0.787706	0.521113	0.550342	0.293666	-0.253241	-0.389087	-0.047873	1.83982	-0.417588	0.594037	0.0247257	0.377714	-0.0352381	-0.00557391	-0.236507
ICC2593	-0.34927	-0.377624	-0.27393	-0.323292	0.010112	-0.13997	-0.17985	-0.173564	-0.335117	-0.41942	-0.390461	-0.449446	0.0781139	-0.328478	-0.172492	-0.347393	-0.0704635	-0.0897448	-0.403459	-0.071322	-0.252514	-0.353863	-0.33253	-0.283152	-0.462817	-0.257037	-0.427645	-0.344641	-0.415594	-0.467912	-0.444218	0.108046	-0.299774	-0.269382	-0.395878	-0.287883	-0.315882	-0.367576	0.149973	1.07442	0.328807	-0.417588	1.55369	-0.410057	0.566849	-0.274683	0.346645	0.216069	0.440885
ICC2629	0.303894	0.529428	0.415132	0.720588	0.405226	0.190632	0.620028	0.383872	0.134395	0.611454	0.870888	0.4857	0.0252832	0.492731	0.498881	0.346872	0.351184	0.28664	0.546775	-0.305724	0.635288	0.427806	0.558393	0.4262	0.508227	0.44191	0.430502	0.556688	0.699042	0.631637	0.425896	-0.364116	0.435591	0.97636	0.478918	0.627493	0.675972	0.58734	-0.433004	-0.362306	-0.316081	0.594037	-0.410057	1.27791	-0.176889	0.567336	-0.33154	-0.201465	-0.332508
ICC2679	-0.0167317	-0.147057	-0.142213	-0.154116	-0.166686	-0.247053	-0.128253	0.13244	-0.175306	-0.14411	-0.126598	-0.0357472	0.301397	0.0462014	-0.0974837	-0.0590772	-0.0937842	-0.109424	0.0627866	-0.157594	-0.0131028	-0.255963	-0.127977	-0.113976	0.0346442	-0.144049	-0.0503647	-0.253505	0.0168345	-0.0224768	-0.0112689	0.0186517	0.0785468	-0.100726	0.0760904	0.11333	0.129553	-0.149495	-0.071047	0.57506	0.47145	0.0247257	0.566849	-0.176889	1.40612	0.0177951	0.466396	0.397731	0.113211
ICC2720	0.28423	0.328192	0.296098	0.454321	0.232606	0.199062	0.595681	0.399065	0.100684	0.415422	0.574965	0.431178	0.163779	0.401791	0.333023	0.39172	0.369499	0.262294	0.425139	-0.310821	0.335723	0.38421	0.234376	0.345666	0.454226	0.276573	0.381183	0.362216	0.695506	0.572953	0.397907	-0.348402	0.350374	0.783449	0.419194	0.803968	0.87898	0.457901	-0.188895	-0.266472	-0.0329527	0.377714	-0.274683	0.567336	0.0177951	0.992496	-0.0411282	0.0265151	-0.158115
ICC2737	-0.0980262	-0.22419	-0.0497404	-0.236451	-0.32706	-0.264356	-0.194981	0.0521863	-0.228506	-0.226445	-0.240669	-0.139933	0.756492	-0.0782749	-0.117387	0.0359968	-0.0408514	-0.183955	-0.0133054	-0.155127	-0.299901	-0.187942	-0.161927	-0.200993	-0.0820282	-0.175919	-0.0499782	-0.23751	-0.0332444	-0.108454	0.0588326	0.266162	0.0196235	-0.196068	-0.0176904	0.0575282	-0.0115718	-0.176682	0.0672088	0.293465	1.45617	-0.0352381	0.346645	-0.33154	0.466396	-0.0411282	1.56401	1.18735	0.23742
ICC2884	0.00187326	-0.0852705	0.0355918	-0.141754	-0.214674	-0.180064	-0.0976825	0.11983	-0.147856	-0.130188	-0.119959	-0.028588	0.65453	0.0221449	-0.0513049	0.109363	0.0117043	-0.0934201	0.0735876	-0.170725	-0.161502	-0.10157	-0.0989664	-0.103695	0.027236	-0.0754989	0.0410768	-0.129807	0.0364799	-0.0283242	0.0895373	0.191254	0.0914288	-0.129465	0.0619189	0.114766	0.0503486	-0.0575332	0.00894882	0.182659	1.15339	-0.00557391	0.216069	-0.201465	0.397731	0.0265151	1.18735	1.21858	0.146904
ICC2919	-0.260796	-0.437424	-0.359224	-0.295688	-0.298373	-0.161271	-0.301042	-0.236486	-0.117098	-0.227413	-0.385749	-0.333398	0.0386037	-0.1141	-0.295765	-0.253716	0.188136	-0.203132	-0.105319	0.149299	-0.410644	-0.223768	-0.575463	-0.35856	-0.236473	-0.207062	-0.452068	-0.299349	-0.114853	-0.167691	-0.21007	-0.0193887	-0.321075	-0.299007	-0.453597	-0.18328	-0.15197	-0.512699	0.387762	0.354928	0.240393	-0.236507	0.440885	-0.332508	0.113211	-0.158115	0.23742	0.146904	1.51057
ICC2969	0.204294	0.39445	0.361314	0.303629	0.261924	0.18728	0.370072	0.236927	-0.00838704	0.239237	0.440922	0.223258	-0.0176087	0.822346	0.532988	0.127611	0.106951	0.332193	0.377459	-0.400642	0.512276	0.232998	0.390118	0.354174	0.246305	0.693487	0.081176	0.327542	0.17699	0.189184	0.279472	-0.160924	0.181473	0.476679	0.188381	0.2636	0.285546	0.426869	-0.143969	-0.0441364	-0.137862	0.185401	-0.0533878	0.438495	-0.0761883	0.249746	-0.141355	-0.0659075	-0.0668849
ICC2990	-0.261405	-0.159694	-0.0601623	-0.10068	-0.048737	-0.0443018	-0.0555673	-0.124199	-0.193665	-0.166632	-0.152241	-0.314758	0.0166636	-0.0860955	-0.0476891	-0.196057	0.0215633	-0.0367376	-0.115293	-0.0521317	-0.102738	-0.0813054	-0.260794	-0.139099	-0.237603	0.03373	-0.404813	-0.103299	-0.157604	-0.210962	-0.245017	0.13556	-0.29151	-0.0946334	-0.399059	-0.193255	-0.15466	-0.182422	0.0162065	0.503114	0.15394	-0.171563	0.537044	-0.120851	0.0985546	-0.0999345	0.158251	0.0906262	0.699916
ICC3218	-0.109268	0.101698	0.0430705	0.079552	0.180919	0.179111	0.112178	-0.00847994	-0.156505	-0.0280213	0.00770019	-0.123601	-0.107458	0.0431504	-0.0531908	0.023715	0.160694	0.25535	0.010831	-0.14972	0.284557	-0.121144	0.271135	-0.000488356	-0.125526	0.0937812	-0.156427	0.109188	-0.154781	-0.0156428	-0.208377	0.0785524	-0.269958	0.0627067	-0.148592	-0.124359	-0.103974	0.223603	0.19956	0.280663	-0.179847	-0.0985056	0.186609	0.00839511	-0.057823	-0.0534101	-0.196346	-0.147432	0.0425261
ICC3230	0.562057	0.577405	0.200897	0.471497	0.593154	-0.0189205	0.557709	0.519253	0.239601	0.634979	0.733653	0.674668	0.199164	0.60366	0.516683	0.384444	0.453789	0.19935	0.600995	-0.396656	0.597942	0.305658	0.451853	0.278039	0.521867	0.251088	0.908215	0.311237	0.753783	0.658804	0.677816	-0.527365	0.80405	0.821956	0.945185	0.832069	0.808752	0.363221	-0.413641	-0.443874	-0.0735256	0.969779	-0.414106	0.713537	0.0375725	0.580456	-0.0780593	0.0161173	-0.293375
ICC3239	-0.186564	-0.105663	-0.0805287	-0.0445675	-0.0612995	-0.010561	-0.0722919	-0.141444	-0.0824054	-0.0959526	-0.163243	-0.236795	0.0212697	-0.0882528	-0.0618123	-0.160755	-0.0341809	0.0146921	-0.143984	0.0487228	-0.0611936	-0.0355986	-0.2411	-0.141777	-0.227794	0.0253296	-0.376795	-0.0919299	-0.189416	-0.223524	-0.23885	0.105309	-0.283782	-0.112398	-0.387689	-0.176682	-0.154216	-0.173133	0.00468453	0.34956	0.0680208	-0.181004	0.349674	-0.0876303	0.0167973	-0.0713963	0.0530819	0.0291591	0.538038
ICC3325	0.513658	0.614329	0.598362	0.287829	0.5151	0.192291	0.424508	0.333505	0.278086	0.279106	0.451656	0.740726	0.0534758	0.220732	0.820501	0.151352	0.0599363	0.292982	0.293506	-0.459623	0.348202	0.342581	0.553289	0.561567	0.415199	0.428482	0.823398	0.362208	0.242351	0.219688	0.739192	-0.106488	0.910688	0.294916	0.782329	0.214504	0.167255	0.544777	-0.238328	-0.384059	-0.106837	0.480198	-0.318913	0.401365	-0.277721	0.197008	-0.11033	-0.0354035	-0.542595
ICC3362	0.405836	0.624606	0.457764	0.273654	0.204376	0.189561	0.407211	0.424422	0.159858	0.334125	0.467136	0.46486	0.111097	0.59103	0.33705	0.367132	0.205481	0.336035	0.440091	-0.452988	0.40114	0.218111	0.33205	0.457907	0.509758	0.331065	0.477816	0.378208	0.520043	0.484373	0.503905	-0.311079	0.441805	0.304673	0.519468	0.400109	0.45119	0.60656	-0.234294	-0.351931	-0.114249	0.233466	-0.4361	0.397595	0.0707262	0.371168	-0.128148	0.0222173	-0.306525
ICC3391	-0.195062	-0.204687	-0.214931	-0.2003	0.0394566	-0.0440324	-0.199931	-0.159828	-0.124721	-0.267814	-0.209721	-0.303563	0.0403447	-0.248148	-0.164999	-0.164571	-0.0999085	0.00255146	-0.239887	0.0199338	-0.111834	-0.230351	-0.159073	-0.172647	-0.299245	-0.131964	-0.379571	-0.139969	-0.401337	-0.357406	-0.3899	0.209707	-0.294362	-0.319117	-0.263521	-0.273105	-0.320875	-0.244064	0.0622589	0.820222	0.124555	-0.389804	0.733452	-0.282383	0.50931	-0.244818	0.115859	0.089855	0.241314
ICC3410	-0.19332	-0.39232	-0.287065	-0.398338	-0.267316	0.180903	-0.366232	-0.216874	-0.0766751	-0.296246	-0.448339	-0.388704	0.0134732	-0.349937	-0.46969	-0.121728	-0.0835983	-0.0909135	-0.357284	0.243308	-0.258365	-0.096982	-0.13652	-0.284841	-0.145065	-0.2863	-0.190534	-0.295345	-0.413121	-0.366069	-0.378793	0.0147906	-0.185445	-0.576985	-0.339297	-0.367091	-0.387806	-0.354697	0.542642	0.158111	0.166358	-0.376615	0.225339	-0.498629	-0.0248162	-0.301344	0.158702	0.107726	0.152532
ICC3421	-0.320314	-0.51307	-0.402093	-0.330234	-0.310027	-0.193216	-0.34183	-0.252823	-0.160487	-0.267161	-0.434342	-0.397078	0.0378754	-0.122112	-0.329269	-0.287221	0.196772	-0.225191	-0.137784	0.163658	-0.46704	-0.267678	-0.627177	-0.393626	-0.290268	-0.235884	-0.512106	-0.352624	-0.13275	-0.193392	-0.230568	-0.00711054	-0.371749	-0.307539	-0.511034	-0.196495	-0.154779	-0.580021	0.426054	0.419233	0.279204	-0.253363	0.511432	-0.371216	0.137455	-0.186417	0.286116	0.160222	1.45522
ICC3512	0.23561	0.449177	0.412921	0.441078	0.241734	0.24721	0.293693	0.220379	0.202939	0.381889	0.412928	0.343018	0.0490851	0.533701	0.508636	0.160488	0.0789574	0.243849	0.431667	-0.261632	0.512896	0.380852	0.324146	0.46613	0.457111	0.802842	0.139025	0.343771	0.258771	0.236108	0.322754	-0.241984	0.270538	0.424233	0.197326	0.287632	0.277322	0.42801	-0.174564	-0.234452	-0.17522	0.234406	-0.284804	0.509351	-0.143722	0.302913	-0.187037	-0.0845366	-0.23639
ICC3582	0.172107	0.134908	0.0820028	0.166348	-0.0413196	-0.16695	0.151631	0.201098	0.100416	0.199766	0.146523	0.179104	0.211375	0.304234	0.115287	0.30717	0.0107716	-0.0501306	0.18295	-0.223164	0.358867	0.0655421	0.145664	0.0493694	0.151166	0.1863	0.0968526	0.252693	0.22024	0.132544	0.0703954	0.12737	0.200792	0.137017	0.176484	0.298526	0.258041	0.119984	-0.0289225	-0.0336625	0.118696	0.18547	-0.105865	0.15138	0.137708	0.19935	0.111041	0.148509	0.0715734
ICC3631	0.0739016	0.0715604	0.116985	0.0525356	-0.104147	0.0287931	0.0586282	0.130467	0.00585326	0.0635818	0.036872	0.0949462	0.444577	0.0998961	0.0352908	0.108555	0.0467941	0.0415599	0.132089	-0.149162	0.00833565	0.0937607	-0.0337015	0.0213998	0.106028	0.0719673	0.0496333	0.00881503	0.117873	0.0775211	0.0699996	0.00627319	0.103107	0.0362105	0.0564282	0.156099	0.133823	0.0712037	-0.0438856	0.0471026	0.628677	0.0232727	0.0472159	0.0172767	0.184136	0.140164	0.632988	0.542471	0.0305973
ICC3761	-0.0196173	-0.068782	0.0614451	-0.120063	-0.18674	-0.140684	-0.0650658	0.0900148	-0.130847	-0.117861	-0.10191	-0.0178224	0.629918	-0.00298747	0.0026425	0.0634202	-0.00822539	-0.0623642	0.050016	-0.15996	-0.15854	-0.0590679	-0.0637484	-0.0892877	0.00366445	-0.0392404	0.0175053	-0.103953	0.0285162	-0.0466931	0.109668	0.16196	0.077222	-0.0952874	0.0180571	0.100039	0.0533104	-0.0316799	0.0342818	0.154925	1.09496	-0.00625397	0.219551	-0.176653	0.341383	0.0398821	1.11956	0.914066	0.135298
ICC3776	0.047712	-0.00873636	0.0861129	-0.0527338	-0.145424	-0.128502	0.0235942	0.175553	-0.111902	-0.0271202	-0.0127294	0.0521082	0.609323	0.0757876	-0.0059864	0.155722	0.0559823	-0.0278114	0.116825	-0.196162	-0.0797651	-0.0177517	-0.0406414	-0.0162356	0.0777571	-0.0171739	0.0926384	-0.0376648	0.128102	0.0596557	0.124451	0.118473	0.128423	-0.00350587	0.118683	0.21055	0.166423	0.0294062	-0.0305353	0.126526	0.980197	0.0314204	0.145889	-0.092675	0.343159	0.131143	0.998555	0.839884	0.102737
ICC3892	-0.0604671	-0.163739	-0.156294	-0.158832	-0.467951	0.0666309	-0.276041	-0.213047	0.0650219	-0.102003	-0.301439	-0.21371	0.110948	0.0316006	-0.235386	-0.0596309	-0.219201	-0.183334	-0.0891632	0.127996	-0.0974186	0.00673585	-0.1072	-0.251879	-0.0142939	0.0411307	-0.196592	-0.167175	-0.215236	-0.214487	-0.171543	0.149204	-0.239887	-0.263601	-0.289687	-0.182212	-0.166509	-0.229128	0.383628	-0.117962	0.252907	-0.176649	-0.0965175	-0.237272	0.117401	-0.114905	0.245252	0.199998	0.19746
ICC3946	0.404818	0.578325	0.40732	0.314257	0.439036	0.140679	0.30058	0.349527	0.163522	0.422592	0.579534	0.593907	0.15378	0.415204	0.504596	0.320851	0.235159	0.365192	0.468208	-0.434236	0.482324	0.180674	0.556825	0.311735	0.572212	0.311838	0.71976	0.303313	0.489369	0.361614	0.671452	-0.274118	0.577615	0.432159	0.702623	0.448516	0.464739	0.490044	-0.140104	-0.348266	-0.000809803	0.688717	-0.500069	0.507393	-0.0671208	0.369109	-0.00326246	0.0805089	-0.339279
ICC4093	-0.0603389	0.088716	0.1331	0.0722925	-0.106241	-0.103887	0.0653786	-0.000651866	-0.0893676	-0.00458541	0.060791	-0.0153623	0.0163886	0.0660661	0.0857431	-0.048057	-0.0515483	0.0394659	0.187744	-0.186634	0.114976	-0.00666274	0.137972	0.0552038	-0.0131251	0.212425	-0.086168	-0.0224137	-0.0236511	-0.0395507	-0.101179	0.217486	-0.20334	0.0642916	-0.17198	-0.0488968	-0.0305929	0.0930417	-0.0522228	0.034083	0.010073	0.0331447	0.0154669	0.0594049	0.129495	-0.00864345	-0.000183631	0.0326021	0.0123751
ICC4182	-0.00769398	-0.0963986	0.0442337	-0.126349	-0.208634	-0.196395	-0.114533	0.083729	-0.157423	-0.137154	-0.101952	-0.0199461	0.722482	-0.00250994	-0.0457845	0.086269	0.0115018	-0.0977847	0.0635001	-0.140753	-0.159103	-0.0929277	-0.0918853	-0.136674	-2.01203e-05	-0.0840256	0.0372325	-0.108158	0.0378382	-0.0384117	0.0929766	0.181687	0.0974694	-0.110938	0.0320614	0.137455	0.0647134	-0.0686612	-0.00998313	0.180375	1.21302	-0.00317513	0.235636	-0.181898	0.397008	0.0320354	1.22305	0.999867	0.176876
ICC4363	0.124005	0.11386	0.038063	0.0672608	-0.0457195	-0.0990333	-0.0176923	0.118139	-0.0324882	0.131894	0.0453541	0.142448	0.461903	0.153641	0.0458539	0.10351	0.0198985	0.00373877	0.199361	-0.158889	0.193186	-0.0788081	0.127738	-0.0819743	0.0858955	0.0721253	0.136155	-0.0284859	0.128956	0.0984895	0.0467458	0.0204782	0.0647654	0.0691449	0.110693	0.170304	0.128778	0.0474296	-0.070261	0.0451795	0.604903	0.216448	0.0265634	0.0710216	0.314879	0.100262	0.598808	0.522859	0.0427212
ICC4418	-0.0178948	-0.102958	0.0314315	-0.120422	-0.228199	-0.201393	-0.117451	0.0797713	-0.136409	-0.113537	-0.128802	-0.0140189	0.704477	-0.00542712	-0.061188	0.0854328	0.00650359	-0.107465	0.0496574	-0.116616	-0.18075	-0.0708723	-0.141626	-0.131787	0.00538688	-0.0864225	-2.19784e-05	-0.124602	0.0302387	-0.0434099	0.0671679	0.196458	0.0706202	-0.14403	-0.00467274	0.103322	0.0331819	-0.078862	-0.00613691	0.176417	1.17524	-0.0175381	0.218152	-0.203545	0.386287	0.0244359	1.18423	0.981862	0.174479
ICC4463	0.00122479	-0.0463791	0.0609564	-0.0903765	-0.167459	-0.130767	-0.0348591	0.108256	-0.112607	-0.0871342	-0.0737839	0.00978309	0.606538	0.0142127	0.022444	0.100911	0.000130384	-0.0675352	0.0776215	-0.156286	-0.123651	-0.0351043	-0.0236567	-0.051277	0.0364725	-0.0225604	0.0508336	-0.0763481	0.0582027	-0.0138851	0.132071	0.146904	0.117314	-0.057797	0.066473	0.144813	0.0850779	-0.0181215	0.0598062	0.116457	1.04661	0.022392	0.181083	-0.144885	0.310719	0.0633254	1.06132	0.872477	0.0885061
ICC4495	0.53833	0.537029	0.426375	0.263076	0.581393	0.0286277	0.456983	0.442979	0.191942	0.342277	0.511705	0.711291	0.14266	0.301072	0.517928	0.371121	0.2282	0.289559	0.409223	-0.430269	0.328651	0.144581	0.542063	0.323506	0.405533	0.141517	1.28821	0.371272	0.457959	0.485761	0.692587	-0.16922	0.814659	0.429363	1.05985	0.505029	0.480672	0.505457	-0.329154	-0.397886	-0.0400245	0.586551	-0.388929	0.391179	-0.0491068	0.367353	-0.0383151	0.0490981	-0.446128
ICC4533	0.197964	0.138914	-0.0783938	-0.102263	-0.192872	0.208003	-0.160162	-0.305793	0.263102	-0.113067	-0.22562	0.0811388	-0.169612	-0.447179	-0.0846499	-0.209606	-0.39883	-0.115319	-0.192835	0.1752	-0.217218	-0.0423081	-0.302437	-0.113629	-0.0872698	-0.136418	-0.0921584	-0.114247	-0.435966	-0.447183	-0.123298	0.0913155	-0.0605358	-0.365192	-0.0739177	-0.3993	-0.429381	-0.00763638	-0.394822	-0.225275	-0.230035	-0.307374	-0.385402	-0.142204	-0.392595	-0.222738	-0.273068	-0.21635	-0.272475
ICC4567	0.0827479	0.40453	0.530074	0.365215	0.404151	0.174988	0.359861	0.267818	-0.022239	0.405916	0.678356	0.319701	-0.0200149	0.379799	0.481157	0.208967	0.163855	0.404704	0.438525	-0.315124	0.722136	0.276374	1.09423	0.387145	0.375005	0.447078	0.43775	0.437512	0.454484	0.511421	0.394124	-0.224201	0.28416	0.553873	0.426336	0.290329	0.339848	0.570657	-0.209847	-0.246843	-0.182409	0.68973	-0.313844	0.586445	-0.121776	0.292603	-0.189024	-0.125022	-0.420988
ICC4593	0.478739	0.34113	0.440662	0.300254	0.455729	0.158413	0.560755	0.642479	0.068359	0.269159	0.536918	0.653781	0.221979	0.511497	0.406312	0.475413	0.394403	0.275232	0.521839	-0.475292	0.453754	0.197887	0.423162	0.523006	0.590466	0.245809	0.682866	0.415734	0.627283	0.56404	0.543512	-0.291762	0.791487	0.570593	0.82649	0.753434	0.721793	0.557722	-0.276368	-0.174975	0.0970439	0.398456	-0.221685	0.476222	0.258087	0.544482	0.0982331	0.169518	-0.321545
ICC4639	0.279513	0.435331	0.316353	0.62285	0.315292	0.119426	0.523329	0.271566	0.119898	0.507993	0.668057	0.471203	0.0638531	0.282616	0.386575	0.279308	0.195697	0.232604	0.323133	-0.23958	0.440781	0.343074	0.304576	0.28528	0.316841	0.285903	0.350452	0.445942	0.506096	0.394988	0.308387	-0.192359	0.274901	0.760522	0.331234	0.565653	0.602686	0.463589	-0.321077	-0.281595	-0.222883	0.338659	-0.291367	0.719737	-0.138839	0.495611	-0.235741	-0.145207	-0.288215
ICC4657	0.552602	0.678765	0.507761	0.436028	0.818336	0.137067	0.519639	0.458811	0.2983	0.423142	0.674772	0.823372	0.0835748	0.241987	0.67215	0.361982	0.161831	0.294466	0.387597	-0.444611	0.525015	0.295161	0.490782	0.571896	0.396913	0.29626	0.804592	0.569196	0.464947	0.484425	0.627259	-0.341722	0.860667	0.452999	0.891507	0.378831	0.34771	0.5421	-0.495933	-0.279562	-0.25831	0.524864	-0.307543	0.552165	-0.119117	0.323876	-0.274289	-0.141613	-0.523422
ICC4814	0.0589478	0.0451609	0.112957	-0.0123633	-0.133668	-0.0772065	-0.00523017	0.10979	-0.0423973	0.0174124	0.00214826	0.0727087	0.536277	0.0802599	0.0177357	0.121695	0.0261174	0.00735644	0.121297	-0.134982	-0.034192	0.02522	-0.0398108	-0.0351749	0.0780674	0.00914949	0.0565304	-0.0295505	0.0841898	0.0131425	0.0888628	0.0886083	0.0881531	-0.0489786	0.0466771	0.131781	0.0840114	0.0380407	-0.0609204	0.0670063	0.815585	0.0202849	0.0775249	-0.0585477	0.253464	0.0991975	0.815213	0.688278	0.0577846
ICC4841	0.00617842	-0.016453	-0.0839253	0.0607706	0.00033663	0.0573183	-0.0247028	-0.078247	0.158721	0.0510064	-0.0391754	0.0209799	-0.165259	-0.176452	0.0216748	0.0267845	-0.040699	-0.0147175	-0.12657	0.249269	0.0535092	0.144137	-0.0650064	0.037959	-0.0449373	-0.0389375	-0.127345	0.014969	-0.124658	-0.190503	-0.142356	0.0405213	-0.113411	-0.0486813	-0.146563	-0.0703037	-0.0457567	-0.0589509	0.0220984	-0.0986598	-0.346382	-0.0553759	-0.127161	-0.0135079	-0.211872	0.00532742	-0.368605	-0.285354	-0.189042
ICC4853	0.143338	0.0775249	0.12399	-0.0507549	-0.0721692	-0.142652	0.0859234	0.195741	-0.0256411	-0.0350263	0.014222	0.0561681	0.0624261	0.250493	0.0324108	0.173829	-0.0830297	0.020991	0.116723	-0.320087	0.105866	-0.0865285	0.0752747	0.125173	0.118235	0.0857357	0.135718	0.0527585	0.0572439	0.0382228	0.0395458	0.228146	0.155375	-0.0920525	0.202863	0.0959904	0.0508224	0.151565	0.00682132	-0.00156047	0.0607929	-0.112794	-0.0898916	-0.0417915	0.159925	0.0223065	0.050016	0.101011	-0.08622
ICC4872	-0.0178409	-0.073769	-0.0881747	-0.128692	-0.183403	0.15452	-0.213125	-0.259385	0.133141	-0.1858	-0.361305	-0.266812	-0.29229	-0.123993	-0.222935	-0.268811	-0.216635	0.00444484	-0.222385	0.324619	-0.195263	0.0171058	-0.331988	-0.140058	-0.229197	0.068149	-0.456758	-0.191662	-0.474881	-0.396093	-0.309447	0.0269071	-0.321603	-0.306298	-0.449963	-0.392433	-0.360082	-0.167773	0.236359	-0.0940648	-0.402138	-0.554914	-0.0929109	-0.247193	-0.298323	-0.23304	-0.439448	-0.328103	0.0163737
ICC4918	-0.110029	-0.0265274	0.14532	-0.110585	0.120848	0.69653	-0.0675538	-0.226191	0.0711275	-0.174977	-0.122607	-0.190436	-0.24817	-0.0741499	-0.116384	-0.26163	-0.219858	0.333148	-0.238095	0.11069	-0.114205	0.147589	0.063829	0.0606609	-0.134612	0.221004	-0.21806	-0.0939552	-0.419316	-0.171443	-0.198734	-0.118348	-0.163025	-0.128471	-0.22063	-0.338948	-0.300874	0.0652021	0.210764	0.0785598	-0.306512	-0.470214	0.0906392	-0.155209	-0.234433	-0.15042	-0.31989	-0.264213	0.0766218
ICC4991	0.492342	0.495204	0.318997	0.20044	0.283078	0.26046	0.361051	0.325716	0.371227	0.332708	0.437104	0.726174	0.0430854	0.193173	0.437083	0.284033	0.184814	0.227964	0.362715	-0.274915	0.11618	0.359765	0.234384	0.355038	0.493253	0.149117	0.787515	0.203023	0.386999	0.417923	0.557115	-0.349435	0.64537	0.25279	0.765695	0.330537	0.34572	0.34137	0.0212976	-0.529717	-0.157808	0.518712	-0.510874	0.250504	-0.188221	0.304717	-0.163902	-0.0749285	-0.369854
ICC5135	0.309874	0.48234	0.373767	0.735932	0.431496	0.192449	0.609879	0.340426	0.106557	0.553962	0.816517	0.510408	0.0713226	0.486224	0.486131	0.328919	0.297854	0.317072	0.469512	-0.281535	0.554384	0.382799	0.465003	0.410849	0.428883	0.434363	0.395901	0.52937	0.684211	0.608481	0.464651	-0.353974	0.385902	1.08899	0.487498	0.762497	0.832307	0.567306	-0.385924	-0.307422	-0.215934	0.50793	-0.351531	0.95144	-0.11212	0.664361	-0.228272	-0.134615	-0.315083
ICC5221	0.341368	0.293244	0.245021	0.369947	0.432295	0.29678	0.618482	0.403656	0.151578	0.402324	0.477585	0.500282	0.0986549	0.288803	0.187779	0.427527	0.583756	0.396951	0.426609	-0.297905	0.146257	0.161967	-0.00919716	0.290427	0.307421	0.134451	0.45757	0.259113	0.628302	0.554133	0.370243	-0.479599	0.433525	0.703238	0.464365	0.727919	0.818539	0.273117	-0.0589212	-0.202051	-0.16519	0.31155	-0.181647	0.494929	-0.113402	0.623539	-0.177008	-0.0698243	0.0577029
ICC5337	0.0200341	-0.0161241	-0.0081585	0.0631805	-0.311491	-0.267516	0.0911241	0.127585	0.00453217	0.177239	0.0438751	0.104551	0.00727655	0.0507109	-0.142919	0.126483	0.114668	-0.211047	0.235861	0.0253649	0.0319871	-0.016295	-0.182257	-0.0465148	0.11043	-0.0183185	-0.0718682	-0.0393296	0.225807	0.337892	-0.069711	0.15999	-0.0381646	0.112929	-0.0125268	0.190676	0.186089	-0.0310481	-0.139374	-0.246605	-0.04066	0.109876	-0.26262	0.109603	-0.0169658	0.150289	-0.0634028	-0.00876609	0.0771402
ICC5383	-0.0233148	0.0570656	0.20134	-0.0691331	0.134205	0.6152	0.0202013	-0.121787	0.109458	-0.134565	-0.0322503	-0.0745866	-0.117233	-0.0717177	-0.0140616	-0.147862	-0.176326	0.324134	-0.182597	0.0189546	-0.089401	0.20673	0.0157958	0.118241	-0.0400933	0.206788	-0.145913	-0.023889	-0.303466	-0.199706	-0.0974521	-0.0982269	-0.0664259	-0.164538	-0.136516	-0.222579	-0.206876	0.131106	0.184582	0.0617423	-0.16517	-0.452174	0.0675786	-0.133527	-0.165408	-0.0611044	-0.18271	-0.127033	-0.00106622
ICC5434	0.0788441	0.213332	0.315465	0.0579983	0.212953	0.69915	0.150454	0.000661794	0.159591	0.0144171	0.00799748	-0.0166499	-0.190923	0.194324	0.0469967	-0.0732767	-0.0289039	0.476238	0.00540546	-0.0630591	0.0762298	0.407739	0.0799757	0.318729	0.0813153	0.434329	-0.128036	0.0017915	-0.174774	-0.0996279	-0.00986049	-0.23851	0.0310506	0.0505177	-0.113437	-0.117298	-0.0891093	0.271244	0.26489	-0.11704	-0.371006	-0.303191	-0.121089	0.0430297	-0.367602	0.0394937	-0.394789	-0.263674	-0.108573
ICC5504	-0.272256	-0.470216	-0.599079	-0.38883	-0.910736	-0.226839	-0.551302	-0.499233	-0.0167019	-0.282576	-0.764515	-0.58574	-0.159111	-0.447603	-0.770258	-0.246448	-0.513191	-0.559006	-0.402924	0.546764	-0.354471	-0.325234	-0.425642	-0.520897	-0.36031	-0.441715	-0.598796	-0.406538	-0.560212	-0.490268	-0.663233	0.331773	-0.709726	-0.665286	-0.690851	-0.535512	-0.516168	-0.567341	0.129178	-0.0462082	-0.037962	-0.479484	-0.064304	-0.532303	0.129324	-0.413058	-0.0653873	-0.0737022	0.0741153
ICC5613	0.167935	0.308666	0.279173	0.124198	0.295801	0.818936	0.316024	0.0918339	0.175845	0.0941435	0.188655	0.134352	-0.176749	0.156991	0.110075	0.064719	0.0981662	0.552843	0.147043	-0.195079	0.192374	0.386014	0.197681	0.418226	0.25729	0.414166	-0.0202156	0.146551	-0.0196098	-0.0599617	0.0703861	-0.339834	0.0660345	0.14221	0.0557742	0.059717	0.078021	0.406118	0.235361	-0.0758129	-0.422905	-0.166756	-0.214609	0.134202	-0.345104	0.163963	-0.440446	-0.299445	-0.193769
ICC5639	0.419407	0.641819	0.494747	0.279422	0.234075	0.19689	0.420262	0.45048	0.131288	0.337812	0.499436	0.480512	0.112702	0.622291	0.346459	0.357812	0.248708	0.362093	0.480196	-0.497165	0.408989	0.20827	0.347182	0.463674	0.538937	0.359204	0.51688	0.397502	0.558586	0.533842	0.525801	-0.341209	0.468382	0.331771	0.551769	0.43293	0.486612	0.608166	-0.220722	-0.331076	-0.0980764	0.263686	-0.417326	0.426254	0.0874191	0.38578	-0.105211	0.0368293	-0.26642
ICC5845	0.225946	0.204876	-0.00826998	0.0875213	0.323636	-0.0116591	-0.0140802	0.0816907	0.113155	0.171404	0.0598917	0.321388	0.27562	-0.0404463	0.150397	0.0176372	0.18219	0.103599	0.146264	-0.134987	0.0209501	-0.094966	-0.0424177	-0.120503	0.0770213	-0.0397607	0.278156	-0.0945888	0.128406	0.0235422	0.274591	-0.130427	0.240584	0.0659936	0.251655	0.194206	0.140194	-0.0431256	-0.070811	0.055555	0.269825	0.329315	0.0338173	0.0761945	0.131718	0.108557	0.264771	0.236686	0.0884745
ICC5878	0.160666	0.236364	0.162649	0.175198	0.273964	0.701893	0.254648	0.102254	0.188866	0.164394	0.168379	0.154137	-0.204828	0.192384	0.0429758	0.0486057	0.131998	0.465974	0.128328	-0.0826878	0.267827	0.364178	0.169082	0.384944	0.22765	0.352269	-0.0654634	0.145525	-0.0138721	0.0649159	-0.13042	-0.389244	0.039516	0.103726	0.0485054	0.00666524	-0.00884784	0.275548	0.150573	-0.018049	-0.527983	-0.0413586	-0.178696	0.203411	-0.308151	0.0979042	-0.550726	-0.392557	-0.161498
ICC5879	0.288805	0.346814	0.200262	0.185238	0.340192	0.286358	0.186648	0.114374	0.216074	0.211371	0.177378	0.34991	0.0388081	0.0546687	0.244991	0.0810162	0.0879301	0.264787	0.138368	-0.185025	0.208672	0.109404	0.0688253	0.171791	0.0899349	0.125069	0.226557	0.123308	0.0502743	0.00888193	0.175128	-0.184627	0.296159	0.0945151	0.237515	0.0567646	0.030326	0.210149	-0.203571	-0.0033275	-0.145957	0.115915	-0.0604429	0.187958	-0.132668	0.117308	-0.159335	-0.0864894	-0.131169
ICC6263	-0.193663	-0.369252	-0.432042	-0.252488	-0.287429	-0.102984	-0.408717	-0.294737	0.0384792	-0.205544	-0.435676	-0.282914	-0.0482614	-0.359645	-0.285341	-0.251617	-0.103192	-0.298321	-0.256176	0.467197	-0.345593	-0.196696	-0.482317	-0.382474	-0.212523	-0.261151	-0.411469	-0.365403	-0.30577	-0.335197	-0.34636	-0.151517	-0.401177	-0.431135	-0.423403	-0.254538	-0.265889	-0.459614	0.258236	0.0797285	0.013057	-0.234927	0.137071	-0.37411	0.0497578	-0.208561	-0.00500348	-0.020602	0.23543
ICC6279	0.0982443	0.241056	0.302088	0.0826011	0.201657	0.647274	0.111585	-0.0210387	0.211247	0.0587899	0.0159519	0.0147163	-0.176205	0.170542	0.0549511	-0.0726059	-0.0672528	0.448295	-0.00380874	-0.0134837	0.111758	0.405288	0.0764843	0.27934	0.0715809	0.411068	-0.11592	0.00766488	-0.192833	-0.120808	-0.0258381	-0.255008	0.0322417	0.0277767	-0.119009	-0.129114	-0.105607	0.244341	0.221338	-0.167355	-0.418199	-0.279629	-0.161519	0.058788	-0.38618	0.0328808	-0.443023	-0.304104	-0.167732
ICC6293	0.021541	0.157589	0.282614	0.00277629	0.203514	0.758385	0.11032	-0.0529995	0.122578	-0.0465278	-0.0784402	-0.106729	-0.244064	0.174479	0.0120648	-0.161795	-0.0555116	0.490211	-0.0576205	-0.0672955	0.0147646	0.381131	0.0710569	0.296804	0.0182894	0.434255	-0.203548	-0.0768423	-0.244043	-0.146005	-0.0291845	-0.264077	-0.0215701	0.04368	-0.185308	-0.182925	-0.135487	0.224346	0.35326	-0.103587	-0.394492	-0.369859	-0.0696571	-0.0241584	-0.418141	-0.0162486	-0.394343	-0.300166	-0.0696274
ICC6294	-0.102744	-0.23515	-0.0539378	-0.242209	-0.33646	-0.268033	-0.210624	0.0407052	-0.228541	-0.232204	-0.247468	-0.145691	0.761659	-0.0881952	-0.137713	0.0307589	-0.0398461	-0.191794	-0.0195838	-0.152041	-0.312422	-0.191619	-0.182253	-0.211434	-0.0883066	-0.186359	-0.0546959	-0.24587	-0.037962	-0.108489	0.04423	0.269249	0.013345	-0.207549	-0.0322931	0.0528106	-0.0188907	-0.190765	0.0609304	0.287187	1.4655	-0.0409963	0.348691	-0.342501	0.477807	-0.0505282	1.52496	1.18836	0.250391
ICC6306	-0.367295	-0.55589	-0.375718	-0.335074	-0.695699	-0.499807	-0.331062	-0.294081	-0.148159	-0.245468	-0.471959	-0.435215	0.00442068	-0.310605	-0.569268	-0.112051	-0.235202	-0.570282	-0.150428	0.271194	-0.39124	-0.424435	-0.356278	-0.418236	-0.370547	-0.383797	-0.376996	-0.171731	-0.231237	-0.0114584	-0.395129	0.174303	-0.292827	-0.407067	-0.30777	-0.340245	-0.321421	-0.569773	-0.013205	0.00442626	0.302978	-0.0589434	0.186111	-0.409353	0.185682	-0.344734	0.323417	0.186077	0.466562
ICC6537	-0.261444	-0.278873	-0.111187	-0.238588	-0.43533	-0.336728	-0.246022	-0.16742	-0.250413	-0.380498	-0.406168	-0.391796	-0.00106436	-0.393089	-0.292771	0.0338601	-0.446711	-0.22251	-0.426449	0.0425168	-0.114743	-0.247828	0.0154261	-0.258798	-0.503496	-0.281067	-0.262821	-0.0731633	-0.546278	-0.489861	-0.430789	1.95644	-0.397162	-0.379255	-0.433955	-0.368622	-0.469458	-0.229805	-0.072277	0.208607	0.27148	-0.480117	0.114553	-0.392987	0.00903057	-0.375712	0.287237	0.19568	-0.00611833
ICC6571	0.309225	0.475449	0.413699	0.713953	0.487036	0.184517	0.709641	0.398567	0.0601258	0.496605	0.906394	0.521726	0.0878428	0.430948	0.554157	0.356885	0.372123	0.351281	0.450134	-0.397162	0.495986	0.401401	0.431057	0.502807	0.466734	0.38481	0.429069	0.569302	0.784493	0.583381	0.553488	-0.320806	0.423753	1.18876	0.541477	0.871624	0.985656	0.618684	-0.386052	-0.2472	-0.182766	0.447971	-0.280904	0.94819	-0.0508571	0.755799	-0.174813	-0.103008	-0.303245
ICC6579	0.233152	0.463367	0.396415	0.710196	0.380267	0.150064	0.689756	0.387006	0.0246328	0.571407	0.944258	0.410795	-0.0298515	0.515635	0.487448	0.301102	0.343393	0.272086	0.534822	-0.372825	0.602004	0.408569	0.632283	0.453787	0.46818	0.406546	0.424792	0.524965	0.774493	0.690439	0.456604	-0.372947	0.403348	1.14858	0.542403	0.700863	0.781078	0.609204	-0.447038	-0.329517	-0.309304	0.645035	-0.36374	1.09791	-0.14514	0.603247	-0.29823	-0.214459	-0.32261
ICC6802	0.425078	0.536674	0.462438	0.247113	0.496235	0.0178676	0.379109	0.441063	0.210316	0.444934	0.620605	0.742672	0.139704	0.322048	0.481155	0.41655	0.339701	0.225732	0.482225	-0.398368	0.240372	0.19105	0.458466	0.322631	0.547209	0.161452	1.18276	0.354789	0.580906	0.713801	0.803568	-0.336579	0.773724	0.428488	0.9159	0.443284	0.492283	0.419259	-0.225977	-0.519982	-0.0195689	0.745396	-0.486052	0.409034	-0.0931636	0.358674	-0.0100556	0.0529053	-0.374686
ICC6811	0.288227	0.311379	0.253271	0.179457	0.244406	-0.250089	0.207921	0.312536	0.102079	0.300279	0.325595	0.550153	0.193788	0.179994	0.403614	0.46231	0.676808	-0.00476565	0.487926	-0.227224	0.119649	0.222243	0.27323	0.36371	0.467587	-0.0492759	0.786301	0.398989	0.575161	0.373007	0.730189	-0.00519486	0.584847	0.319731	0.624011	0.382391	0.426187	0.213213	-0.0850085	-0.35144	0.200479	0.796359	-0.406474	0.340857	-0.122841	0.265005	0.20531	0.18607	-0.0667139
ICC6816	0.239583	0.383435	0.321685	0.625581	0.382015	0.122158	0.753935	0.376789	-0.0183612	0.458178	0.842995	0.464049	0.0509767	0.314482	0.467866	0.30181	0.277508	0.229612	0.348756	-0.362752	0.396168	0.359852	0.35205	0.373855	0.344545	0.257939	0.470242	0.467403	0.73358	0.563163	0.458353	-0.201073	0.33226	1.12379	0.473396	0.79886	0.875433	0.556845	-0.377135	-0.261695	-0.155119	0.457929	-0.227244	0.839007	-0.0903245	0.646617	-0.141444	-0.0946111	-0.267795
ICC6874	0.57585	0.57611	0.344755	0.343778	0.827017	-0.0155332	0.399816	0.490904	0.24559	0.437026	0.688656	0.776385	0.150525	0.439523	0.574178	0.373784	0.372374	0.177244	0.518539	-0.469747	0.454616	0.182101	0.491659	0.364148	0.564274	0.218057	1.07601	0.4244	0.630226	0.591956	0.845605	-0.444898	0.945826	0.531395	1.26021	0.633075	0.610798	0.404587	-0.433665	-0.360886	-0.05349	0.787433	-0.397712	0.54836	0.0789388	0.416319	-0.0434564	0.0314706	-0.306636
ICC6875	0.554885	0.537977	0.427843	0.241132	0.651015	-0.0515855	0.441282	0.457453	0.185605	0.352069	0.563118	0.773629	0.144128	0.295776	0.541767	0.376751	0.285336	0.248366	0.440346	-0.444929	0.283296	0.084658	0.62261	0.273468	0.42521	0.0628646	1.55657	0.351929	0.52654	0.582437	0.831404	-0.235907	0.927983	0.481816	1.28711	0.573091	0.544051	0.501202	-0.346936	-0.505153	0.00566559	0.736813	-0.443649	0.399931	-0.0585644	0.382868	0.0255842	0.0739778	-0.474835
ICC6877	-0.421995	-0.757824	-0.632799	-0.484982	-0.83312	-0.495198	-0.740581	-0.474164	-0.0400171	-0.424511	-0.798755	-0.580961	-0.185027	-0.505255	-0.567259	-0.457057	-0.445981	-0.743602	-0.521967	0.817396	-0.70451	-0.27051	-0.909389	-0.596758	-0.438773	-0.463989	-0.810446	-0.637437	-0.415482	-0.443348	-0.450349	0.171109	-0.555632	-0.702648	-0.814057	-0.54426	-0.517632	-0.883043	0.293677	-0.170454	0.0375725	-0.359207	-0.0407956	-0.63834	0.12734	-0.446258	0.0231538	-0.0569572	0.301566
ICC7052	-0.37574	-0.326055	-0.202071	-0.1864	-0.0933569	-0.173204	-0.124119	-0.240615	-0.182617	-0.255994	-0.278022	-0.441059	-0.157501	-0.169215	-0.125085	-0.28802	0.131461	-0.0928032	-0.19321	0.0431987	-0.254012	-0.0754599	-0.373568	-0.168111	-0.368586	-0.0176533	-0.58262	-0.139075	-0.19598	-0.265987	-0.330737	0.126318	-0.459431	-0.145496	-0.603399	-0.271691	-0.229976	-0.372195	0.428376	0.477223	-0.0670484	-0.320235	0.56474	-0.208132	-0.160933	-0.202303	-0.0601363	-0.118917	1.07307
ICC7150	-0.243833	-0.111427	0.0135977	-0.0997561	-0.332397	-0.242638	-0.14621	-0.137843	-0.234363	-0.204728	-0.203344	-0.208221	-0.0562901	-0.1398	-0.0831839	-0.122296	-0.160125	-0.112293	-0.017081	-0.0730593	-0.084126	-0.174549	0.0762186	-0.101237	-0.212227	0.0252887	-0.215555	-0.114862	-0.248246	-0.185066	-0.252938	0.538646	-0.400361	-0.108798	-0.377845	-0.257364	-0.251546	-0.0602775	0.0644737	0.123726	0.129371	-0.0827157	0.0629687	-0.149062	0.0797081	-0.220752	0.128999	0.0873875	0.0760049
ICC7184	-0.500746	-0.551471	-0.517493	-0.454478	-0.507628	-0.0167484	-0.608105	-0.587252	-0.0745457	-0.431986	-0.697496	-0.773649	-0.355344	-0.576723	-0.528951	-0.545172	-0.321309	-0.365563	-0.527361	0.560716	-0.54238	-0.178615	-0.691591	-0.466364	-0.48891	-0.241509	-0.876711	-0.60017	-0.789221	-0.758298	-0.812643	0.104324	-0.747799	-0.780879	-0.929746	-0.804062	-0.801886	-0.613219	0.249783	0.282502	-0.284661	-0.707973	0.383026	-0.617721	-0.111652	-0.58744	-0.302201	-0.308955	0.224376
ICC7255	-0.160459	-0.279859	-0.286981	-0.132921	0.00278372	-0.171231	-0.318285	-0.137711	-0.221744	-0.118233	-0.295298	-0.285088	0.0151176	0.0543899	-0.360872	-0.0129096	0.0413481	0.0355936	-0.0996706	0.0914753	0.0304635	-0.416339	0.166876	-0.317014	-0.189204	-0.199853	-0.0380141	-0.195371	-0.172156	-0.138111	-0.265292	0.226621	-0.32167	-0.152368	-0.122785	-0.0324789	-0.0714037	-0.185529	0.39237	0.336125	0.0655105	-0.128367	0.198889	-0.224368	0.184933	-0.139459	0.0745036	0.0500606	0.18227
ICC7272	-0.74174	-0.856978	-0.72519	-0.625237	-0.637807	-0.29208	-0.919855	-0.968717	-0.101713	-0.651649	-1.01029	-0.995394	-0.444942	-0.950904	-0.836539	-0.746627	-0.67364	-0.4921	-0.952008	0.924786	-0.789617	-0.54083	-0.709393	-0.89049	-0.974947	-0.602163	-1.08129	-0.759483	-1.10253	-1.02687	-0.991206	0.365382	-1.18493	-1.06401	-1.32682	-1.0487	-1.08762	-1.02018	0.574834	0.168972	-0.266045	-1.0218	0.351177	-0.963808	-0.346923	-0.830515	-0.284105	-0.360574	0.310626
ICC7305	-0.65539	-0.710277	-0.697629	-0.522758	-0.687245	-0.0584957	-0.772114	-0.779875	-0.212541	-0.518476	-0.941625	-0.90228	-0.448077	-0.870797	-0.888058	-0.451652	-0.582087	-0.371933	-0.802185	0.885233	-0.543026	-0.377481	-0.479971	-0.464409	-0.71535	-0.59021	-0.914296	-0.569601	-0.97248	-0.795362	-1.09631	0.333633	-1.0861	-0.952691	-1.16867	-1.04559	-1.05122	-0.697628	0.385445	0.384867	-0.375313	-0.920887	0.222659	-0.766122	-0.296471	-0.798272	-0.404819	-0.427181	0.100948
ICC7308	0.0537786	0.233529	0.368959	0.263929	0.0588623	0.342678	0.490612	0.329894	0.142849	0.270293	0.517241	0.0618167	-0.0136064	0.203595	0.384033	0.258037	0.301369	0.0562945	0.265964	-0.0964487	0.160419	1.21769	0.117862	0.741609	0.485466	0.450885	0.0555234	0.369523	0.501473	0.408054	0.217921	-0.159003	0.264555	0.421891	0.113304	0.255116	0.327527	0.310691	0.0993535	-0.391311	-0.109927	0.274206	-0.327205	0.391512	-0.310986	0.349477	-0.108218	-0.0827157	-0.173698
ICC7315	-0.368843	-0.649004	-0.758617	-0.435472	-0.428271	-0.135611	-0.620315	-0.518301	-0.0524179	-0.377081	-0.691496	-0.583997	-0.223441	-0.537946	-0.63949	-0.416391	-0.198771	-0.427198	-0.531246	0.672329	-0.571758	-0.410895	-0.760509	-0.646618	-0.44337	-0.502403	-0.700065	-0.557752	-0.532976	-0.567605	-0.714036	-0.118071	-0.771975	-0.640652	-0.726567	-0.433359	-0.435865	-0.772662	0.323417	0.208382	-0.122583	-0.434039	0.27821	-0.604438	0.0316972	-0.377498	-0.140643	-0.168208	0.387495
ICC7323	-0.649606	-0.903233	-0.838039	-0.54923	-0.40156	-0.295153	-0.809512	-0.673681	-0.188548	-0.667209	-0.885375	-0.907421	-0.415759	-0.918599	-0.727756	-0.580615	-0.465487	-0.622117	-0.997222	0.978941	-0.642335	-0.396149	-0.686973	-0.704709	-0.848476	-0.662986	-0.996436	-0.488899	-0.808016	-0.710498	-0.958381	0.239007	-0.882612	-0.868868	-0.974033	-0.847829	-0.902882	-0.94365	0.362615	0.398456	-0.261834	-0.773071	0.48077	-0.80508	-0.161662	-0.731617	-0.278334	-0.352202	0.315357
ICC7326	-0.38189	-0.310874	-0.0828383	-0.276833	-0.470974	-0.161145	-0.177613	-0.226475	-0.325596	-0.402615	-0.436088	-0.406108	0.00491307	-0.295545	-0.16037	-0.117281	-0.319513	-0.228499	-0.385094	-0.0945776	-0.213338	-0.24133	-0.10398	-0.159694	-0.391385	-0.164794	-0.380666	-0.0968408	-0.287453	-0.27734	-0.254166	0.713266	-0.410954	-0.315529	-0.534111	-0.399583	-0.364631	-0.154633	0.160534	0.18649	0.330004	-0.401303	0.243832	-0.391171	0.0659936	-0.299499	0.359808	0.22663	0.105992
ICC7413	-0.363555	-0.552149	-0.373018	-0.332374	-0.690918	-0.497108	-0.329923	-0.292942	-0.148061	-0.243809	-0.467178	-0.431995	0.00503942	-0.308426	-0.566568	-0.113513	-0.229901	-0.567583	-0.149809	0.270252	-0.3875	-0.418613	-0.355139	-0.417617	-0.364205	-0.378495	-0.372215	-0.169551	-0.227497	-0.00927892	-0.389308	0.169719	-0.29585	-0.399685	-0.307151	-0.333383	-0.31664	-0.566553	-0.0203902	0.00244369	0.298915	-0.0578044	0.183088	-0.407173	0.18526	-0.337352	0.309989	0.17473	0.462498
ICC7441	-0.313008	-0.356449	-0.248073	-0.374434	-0.39897	-0.0329527	-0.430772	-0.456223	0.024748	-0.397725	-0.563344	-0.550013	-0.386636	-0.383261	-0.33445	-0.364198	-0.279765	-0.0597257	-0.471249	0.605382	-0.47014	-0.0761994	-0.406043	-0.098095	-0.410427	-0.275402	-0.66296	-0.36977	-0.709177	-0.672531	-0.581202	0.156274	-0.555379	-0.713321	-0.794554	-0.742227	-0.743173	-0.385421	0.466136	0.0857673	-0.387228	-0.784008	0.0910832	-0.499698	-0.436891	-0.517281	-0.411532	-0.375625	0.0718633
ICC7554	0.229291	0.487601	0.518978	0.169425	0.0522829	0.419861	0.347725	0.240593	0.0119273	0.108676	0.276023	0.237329	0.138494	0.339047	0.343116	0.0152588	-0.14171	0.494539	0.313491	-0.48438	0.261534	0.0837067	0.157586	0.394258	0.0990953	0.441704	0.0640315	0.119462	0.0854477	0.155912	0.196254	-0.0526854	0.102418	0.258193	0.0781101	0.111188	0.114924	0.426893	-0.31407	0.0276838	0.143104	-0.0819892	-0.0439989	0.215327	0.175122	0.179015	0.148975	0.167714	-0.120968
ICC7571	-0.393364	-0.32547	-0.215533	-0.163964	-0.0449075	-0.232449	-0.0876359	-0.178119	-0.276199	-0.23824	-0.249342	-0.416541	-0.111133	-0.160826	-0.0740347	-0.192227	0.189275	-0.09638	-0.257657	0.0203723	-0.208164	-0.118577	-0.357375	-0.137351	-0.363319	-0.10135	-0.566427	-0.112476	-0.18447	-0.229504	-0.242228	0.10141	-0.397455	-0.0954862	-0.551828	-0.243012	-0.191932	-0.33363	0.334794	0.594347	0.0443526	-0.141201	0.666256	-0.180493	-0.0786669	-0.177266	0.0720751	-0.0397718	0.798953
ICC7668	-0.410937	-0.692139	-0.604573	-0.5837	-1.06034	-0.336386	-0.8034	-0.626989	-0.0747427	-0.481087	-0.933371	-0.620889	-0.202064	-0.482752	-0.703436	-0.386169	-0.634704	-0.611844	-0.616002	0.618788	-0.64871	-0.397322	-0.639762	-0.702239	-0.458411	-0.517444	-0.712505	-0.638346	-0.749358	-0.684617	-0.601093	0.540626	-0.690768	-0.953802	-0.84514	-0.695524	-0.709477	-0.72111	0.501913	-0.0907221	0.030941	-0.735224	-0.0822846	-0.856198	0.161809	-0.581914	0.0274478	-0.0401769	0.0155543
ICC7819	-0.660375	-0.894233	-0.729148	-0.634917	-0.450308	-0.205512	-0.821842	-0.733875	-0.197236	-0.66185	-0.893543	-0.91663	-0.283977	-0.990239	-0.797836	-0.62208	-0.500188	-0.418019	-0.984059	0.96401	-0.874215	-0.29142	-0.630109	-0.601541	-0.867569	-0.711734	-0.89691	-0.616727	-0.872893	-0.830003	-0.881226	0.340093	-0.945928	-0.952474	-1.06804	-0.890855	-0.974002	-0.901873	0.448614	0.341383	0.00677672	-0.830144	0.377394	-0.87724	-0.274923	-0.76788	-0.00452038	-0.155907	0.28898
ICC7867	-0.369777	-0.305005	-0.186744	-0.14558	-0.0327669	-0.211464	-0.0853802	-0.17066	-0.260937	-0.219336	-0.225756	-0.387752	-0.0937898	-0.146084	-0.0785424	-0.182167	0.199335	-0.0785164	-0.238233	0.0314724	-0.185098	-0.107476	-0.335349	-0.140297	-0.339732	-0.0860881	-0.534516	-0.098775	-0.163484	-0.215282	-0.246215	0.087538	-0.370747	-0.0994737	-0.535525	-0.224108	-0.174588	-0.306402	0.31676	0.545617	0.0315207	-0.14831	0.622209	-0.154306	-0.068087	-0.156801	0.0379125	-0.0416782	0.771033
ICC8058	-0.395266	-0.324251	-0.212753	-0.162225	-0.0436886	-0.233311	-0.0869372	-0.176379	-0.2755	-0.236501	-0.245002	-0.416363	-0.109914	-0.158566	-0.0759374	-0.189968	0.191014	-0.0936003	-0.256959	0.0200304	-0.203823	-0.114756	-0.351473	-0.136652	-0.364181	-0.0990909	-0.567289	-0.111778	-0.18169	-0.226724	-0.245171	0.0969065	-0.396236	-0.091666	-0.55269	-0.240753	-0.188111	-0.330851	0.332891	0.592444	0.0440107	-0.141542	0.667475	-0.176673	-0.0795291	-0.173446	0.0686117	-0.0385529	0.799651
ICC8151	-0.287829	-0.278724	-0.255671	-0.26081	0.0439791	-0.0603203	-0.194888	-0.167271	-0.284601	-0.350175	-0.377405	-0.423383	0.0833666	-0.360684	-0.284819	-0.309884	-0.0277519	-0.0251822	-0.315484	-0.0931228	-0.139047	-0.386069	-0.218023	-0.282061	-0.379525	-0.194555	-0.409386	-0.227012	-0.392652	-0.44445	-0.54822	0.0961298	-0.398054	-0.256845	-0.410915	-0.246212	-0.280974	-0.293128	0.0272416	1.03233	0.25446	-0.468003	1.11412	-0.354339	0.477935	-0.24862	0.272298	0.172417	0.434692
ICC8195	-0.400222	-0.393719	-0.326964	-0.399737	-0.415949	0.121755	-0.497176	-0.533032	-0.0234468	-0.439676	-0.616742	-0.639828	-0.293319	-0.594818	-0.548608	-0.300016	-0.284778	-0.141737	-0.539214	0.600369	-0.396593	-0.164975	-0.269025	-0.406941	-0.457581	-0.315793	-0.628953	-0.298825	-0.741764	-0.693672	-0.646566	0.311501	-0.638951	-0.715733	-0.749102	-0.715504	-0.729456	-0.395636	0.313369	0.0771124	-0.225238	-0.715664	0.0715028	-0.583791	-0.33369	-0.524895	-0.239136	-0.247971	0.0486411
ICC8200	0.175416	0.107001	0.346483	0.270068	-0.0598613	-0.0757163	0.543055	0.58784	0.0896785	0.323255	0.450023	0.452949	0.22509	0.363732	0.237215	0.616393	0.492721	0.0551499	0.416215	-0.235983	0.154592	0.429913	0.0417996	0.504786	0.46299	0.0964828	0.370178	0.445378	0.794796	0.740397	0.420199	-0.0831486	0.616148	0.461848	0.437323	0.580696	0.592236	0.266885	-0.0776394	-0.354476	0.178194	0.510301	-0.324188	0.414299	-0.0452364	0.46331	0.183025	0.189797	0.0400251
ICC8261	-0.391363	-0.378616	-0.256713	-0.337291	-0.631322	-0.0228633	-0.398832	-0.42064	-0.184713	-0.379831	-0.648983	-0.629929	0.0422641	-0.351841	-0.309273	-0.4977	-0.672358	-0.311848	-0.46272	0.143594	-0.353917	-0.0588264	-0.218545	-0.292468	-0.462769	-0.033276	-0.464536	-0.485584	-0.653825	-0.568794	-0.550823	0.366664	-0.559337	-0.403561	-0.725155	-0.500101	-0.562438	-0.487187	0.48559	0.24153	0.41782	-0.542922	0.382114	-0.465676	0.0882571	-0.419788	0.448665	0.265022	0.227626
ICC8318	-0.604256	-0.640934	-0.687076	-0.478908	-0.592929	-0.0495026	-0.743871	-0.694924	-0.210832	-0.573475	-0.863437	-0.868834	-0.382375	-0.873249	-0.821316	-0.48428	-0.452393	-0.319238	-0.840536	0.829193	-0.528831	-0.467338	-0.443404	-0.719189	-0.686587	-0.628041	-0.904783	-0.580898	-0.87036	-0.870131	-1.04049	0.352511	-1.10728	-0.868781	-1.07488	-0.887802	-0.891869	-0.589265	0.500572	0.389698	-0.278395	-0.889522	0.271712	-0.722271	-0.201634	-0.687308	-0.298017	-0.333905	0.0906912
ICC8350	-0.320416	-0.316514	-0.376702	-0.283512	-0.244576	0.305093	-0.489687	-0.556237	-0.0492536	-0.395248	-0.594685	-0.652629	-0.374794	-0.237192	-0.420417	-0.606244	-0.365732	-0.0322763	-0.553575	0.539705	-0.366212	-0.113783	-0.434782	-0.404653	-0.460496	-0.117367	-0.788467	-0.483311	-0.719707	-0.68306	-0.48872	0.0182801	-0.672562	-0.456956	-0.778551	-0.627374	-0.591901	-0.340282	0.205881	0.14027	-0.374346	-0.867894	0.225186	-0.399412	-0.158676	-0.425839	-0.393447	-0.361182	0.120123
ICC8384	0.0157494	-0.0490232	-0.233554	0.114564	-0.378207	0.202677	0.0556237	-0.190417	0.118867	0.0694218	0.0505158	-0.128129	-0.295638	-0.177286	-0.211716	-0.15354	-0.156511	-0.268399	-0.0998304	0.352487	-0.0727081	0.175559	-0.305161	-0.0268675	-0.0618996	-0.0767104	-0.30819	-0.00511497	-0.192606	-0.102893	-0.385112	-0.116912	-0.262	0.0800295	-0.285787	-0.251669	-0.191224	-0.123777	-0.383499	-0.236843	-0.432019	-0.292929	-0.305925	0.270241	-0.304793	-0.0927957	-0.456323	-0.381916	-0.169066
ICC8515	0.197623	0.550621	1.13556	0.262101	0.230281	0.232115	0.532486	0.373849	0.0452928	0.183142	0.454021	0.385672	0.0828947	0.310502	0.519554	0.220831	0.121611	0.473797	0.406687	-0.511885	0.306865	0.373041	0.46721	0.610756	0.358774	0.505245	0.44077	0.389026	0.361775	0.358882	0.505358	-0.0198402	0.553553	0.362314	0.344033	0.206464	0.277835	0.72091	-0.233361	-0.367126	0.0313163	0.116819	-0.283771	0.374076	-0.18483	0.280535	0.0460323	0.0808991	-0.414847
ICC8521	-0.38182	-0.425261	-0.0791259	-0.309018	-0.366851	-0.421725	-0.27171	-0.262303	-0.263614	-0.408788	-0.488564	-0.484597	-0.0251915	-0.452073	-0.317419	-0.417402	-0.393839	-0.255482	-0.372016	-0.00918415	-0.378711	-0.364042	-0.178306	-0.344836	-0.487042	-0.307275	-0.309319	-0.409447	-0.390915	-0.447915	-0.271264	0.757038	-0.326081	-0.293087	-0.535601	-0.292338	-0.34427	-0.333532	0.0445867	0.158466	0.250995	-0.418922	0.325584	-0.384337	0.181562	-0.32128	0.273515	0.143459	0.0810905
ICC8522	-0.302251	-0.537149	-0.444901	-0.364198	-0.579149	-0.521127	-0.40701	-0.186896	-0.202775	-0.347428	-0.471427	-0.439886	0.0117155	-0.209143	-0.506305	-0.0792634	-0.295021	-0.582758	-0.307536	0.136978	-0.225786	-0.483213	-0.346903	-0.445799	-0.3388	-0.447778	-0.324438	-0.191489	-0.303543	-0.286145	-0.416969	0.38502	-0.247033	-0.488217	-0.282266	-0.255431	-0.296958	-0.437096	-0.0558553	0.140746	0.228592	-0.229058	0.270925	-0.473854	0.350095	-0.322352	0.234984	0.157994	0.275116
ICC8607	-0.0746238	0.034371	-0.0575536	-0.167266	-0.155903	-0.252919	-0.158572	-0.103381	-0.0682747	-0.172347	-0.177206	-0.188327	-0.00205843	-0.245808	-0.0471614	-0.0576595	-0.409206	-0.171998	-0.272925	-0.136927	-0.14175	-0.216046	0.105998	-0.332629	-0.462869	-0.114017	0.135226	-0.168325	-0.439578	-0.200549	-0.201828	0.841042	-0.0292904	-0.211685	0.0447317	-0.39875	-0.46733	-0.169928	-0.112291	0.0681824	0.252797	0.0193801	0.0474853	-0.207207	-0.0179766	-0.361619	0.271155	0.171274	-0.0627804
ICC8621	-0.00558878	-0.0880502	0.0234474	-0.199161	-0.284048	-0.15527	-0.159772	-0.00156976	-0.144913	-0.151697	-0.250203	-0.0854749	-0.00221823	0.338806	-0.138367	-0.111406	-0.300631	-0.0712272	0.0421935	-0.244261	-0.0217299	-0.290603	0.133412	-0.088786	-0.026009	0.0413815	0.0752357	-0.255888	-0.114574	0.0120778	0.0862374	0.265473	-0.011241	-0.140569	0.074747	-0.0534565	-0.100185	0.0400976	0.0732829	-0.117711	0.112167	-0.0921157	-0.148813	-0.183435	0.239913	-0.140147	0.139369	0.12325	-0.0364068
ICC8718	0.335272	0.368308	0.293032	0.289974	0.180635	0.152814	0.330924	0.352297	0.0908547	0.354607	0.481374	0.392214	0.0660252	1.35288	0.605696	0.256508	0.235328	0.264431	0.608327	-0.423662	0.548566	0.218302	0.497164	0.338438	0.595272	0.692838	0.303199	0.2603	0.467167	0.407045	0.607629	-0.376961	0.452921	0.540022	0.475958	0.500711	0.535663	0.48397	-0.0743822	-0.286706	-0.0485048	0.482862	-0.315728	0.480508	0.0568705	0.391649	-0.0114176	0.04478	-0.0997895
ICC8740	0.459479	0.488873	0.229945	0.376201	0.562892	-0.118898	0.444205	0.638826	0.202575	0.546448	0.72212	0.763025	0.262028	0.385583	0.627412	0.497253	0.580125	0.0806427	0.58582	-0.437324	0.552592	0.327942	0.474137	0.295641	0.627393	0.163597	0.864426	0.296583	0.929544	0.700337	0.802071	-0.417677	0.909575	0.668912	1.01065	0.803888	0.732707	0.339202	-0.236839	-0.358638	0.117323	1.19236	-0.382977	0.615641	0.0681806	0.526782	0.147127	0.165345	-0.246119
ICC8752	-0.363098	-0.403418	-0.385567	-0.332958	0.156525	-0.129346	-0.250387	-0.239939	-0.338019	-0.434288	-0.335615	-0.490328	0.0117396	-0.464047	-0.326791	-0.301391	-0.0967776	-0.074438	-0.445381	-0.0050295	-0.243971	-0.492554	-0.228779	-0.242873	-0.499536	-0.369714	-0.482054	-0.265863	-0.40601	-0.3626	-0.52672	0.0395904	-0.471762	-0.317027	-0.352997	-0.342291	-0.344797	-0.405335	0.063829	1.20366	0.198961	-0.502691	1.19493	-0.416601	0.586318	-0.325449	0.224603	0.102351	0.391679
ICC8855	-0.248833	-0.215797	-0.150082	-0.220774	0.131359	0.0156137	-0.126758	-0.107465	-0.283585	-0.33251	-0.258809	-0.32976	0.070336	-0.36435	-0.181311	-0.236551	0.0206082	0.0341035	-0.228105	-0.189916	-0.120342	-0.331466	-0.238857	-0.128608	-0.36134	-0.152958	-0.432302	-0.192179	-0.332846	-0.374759	-0.455637	0.150213	-0.313795	-0.21785	-0.307407	-0.248837	-0.242499	-0.230721	-0.0118022	1.0578	0.247673	-0.323914	1.01109	-0.305458	0.553349	-0.213786	0.277996	0.168231	0.331136
ICC8950	-0.401112	-0.709367	-0.826264	-0.471903	-0.480311	-0.155915	-0.690563	-0.571381	-0.0675185	-0.406749	-0.759143	-0.630833	-0.232298	-0.582702	-0.698813	-0.457505	-0.211791	-0.469352	-0.576522	0.696248	-0.63056	-0.462414	-0.819831	-0.719467	-0.482403	-0.567969	-0.748983	-0.613433	-0.580333	-0.607678	-0.751508	-0.131611	-0.822453	-0.715062	-0.771843	-0.477074	-0.476979	-0.844471	0.365025	0.229699	-0.104386	-0.465788	0.296927	-0.664281	0.0306437	-0.417051	-0.115684	-0.169781	0.428582
ICC9002	0.192599	0.420734	0.35014	0.675367	0.319424	0.115755	0.693425	0.35998	0.0241405	0.591725	0.896942	0.361398	-0.0038106	0.439705	0.380302	0.304251	0.355387	0.230493	0.469817	-0.337939	0.543763	0.417441	0.505367	0.347682	0.401094	0.347264	0.446151	0.474007	0.769318	0.679542	0.382235	-0.337542	0.353951	1.13716	0.44098	0.753958	0.821686	0.537956	-0.404349	-0.340934	-0.287946	0.583672	-0.300241	0.972035	-0.16176	0.63241	-0.285196	-0.201424	-0.272637
ICC9137	0.592664	0.541938	0.227342	0.368916	0.718448	-0.0314959	0.382292	0.503556	0.177601	0.462684	0.675294	0.802043	0.172541	0.557267	0.678916	0.361983	0.379823	0.162842	0.519745	-0.482589	0.497963	0.216604	0.553735	0.263383	0.6456	0.246837	0.908646	0.400633	0.638196	0.474022	0.902479	-0.355247	0.925702	0.643417	1.09181	0.745097	0.696287	0.493197	-0.390839	-0.245743	-0.0252305	0.918184	-0.397546	0.625524	0.113962	0.480997	0.00197174	0.0508856	-0.322079
ICC9402	-0.635226	-0.696877	-0.683709	-0.521324	-0.70506	-0.142904	-0.690559	-0.730577	-0.183533	-0.517041	-0.847584	-0.861306	-0.420109	-1.01035	-0.873617	-0.437731	-0.497411	-0.355931	-0.85798	0.918923	-0.651367	-0.294886	-0.643979	-0.482224	-0.74305	-0.708956	-0.900896	-0.443824	-0.943472	-0.871447	-1.12817	0.314777	-1.05969	-0.975189	-1.16516	-0.956751	-0.967582	-0.73001	0.42694	0.370694	-0.356189	-0.862744	0.275079	-0.785498	-0.251334	-0.74169	-0.381013	-0.410139	0.185104
ICC9418	-0.365914	-0.409877	-0.390985	-0.336815	0.152147	-0.130602	-0.250082	-0.239114	-0.339275	-0.437105	-0.341553	-0.493144	0.00684176	-0.473107	-0.329608	-0.305248	-0.0995945	-0.0798561	-0.450799	-0.00628555	-0.25251	-0.499012	-0.232116	-0.248811	-0.509637	-0.376693	-0.485911	-0.273882	-0.412469	-0.3727	-0.529016	0.047699	-0.478741	-0.325046	-0.352172	-0.34927	-0.352297	-0.407632	0.0610121	1.2279	0.197705	-0.511231	1.20928	-0.422539	0.585062	-0.332428	0.235833	0.0995338	0.388862
ICC9434	-0.363309	-0.40467	-0.383178	-0.332129	0.155793	-0.127477	-0.248517	-0.232867	-0.33615	-0.43554	-0.332705	-0.488979	0.00892652	-0.472583	-0.325442	-0.301603	-0.0959489	-0.0762106	-0.446633	-0.00420079	-0.249385	-0.494326	-0.22639	-0.250888	-0.50391	-0.373568	-0.479664	-0.269716	-0.40258	-0.361771	-0.526411	0.048223	-0.468852	-0.317238	-0.350608	-0.344063	-0.34605	-0.400345	0.0578943	1.20813	0.20031	-0.500302	1.1994	-0.415772	0.588188	-0.3241	0.22335	0.0990172	0.392508
ICC9586	-0.328816	-0.304624	-0.24099	-0.270062	-0.034467	-0.028471	-0.176565	-0.0568624	-0.339115	-0.341737	-0.250868	-0.362399	0.0382172	-0.469826	-0.301874	-0.12924	0.0842176	-0.0776153	-0.338783	-0.141394	-0.0983533	-0.35526	-0.224152	-0.247611	-0.283163	-0.320865	-0.419678	-0.144177	-0.343634	-0.324156	-0.589727	0.183127	-0.309496	-0.359224	-0.291662	-0.338705	-0.382832	-0.146821	-0.0439209	1.05481	0.222317	-0.253542	0.991975	-0.354746	0.372435	-0.287526	0.247439	0.134031	0.283929
ICC9590	0.328947	0.39424	0.289308	0.507361	0.335071	0.0856186	0.6045	0.514017	0.0585167	0.586041	0.800213	0.559657	0.0825918	0.617673	0.387105	0.446321	0.535437	0.178506	0.670157	-0.346745	0.462121	0.350887	0.482515	0.409632	0.664385	0.309324	0.671983	0.428783	0.937402	0.903813	0.628357	-0.497223	0.564176	0.972798	0.738608	0.853367	0.879995	0.558806	-0.366851	-0.475643	-0.128187	0.871416	-0.490097	0.776976	-0.068074	0.648577	-0.11191	-0.0369828	-0.241903
ICC9636	0.167905	-0.00820309	0.0523089	-0.0522005	-0.0689325	-0.132651	0.0652281	0.207302	0.00308844	-0.0458366	-0.0283242	0.0734519	0.0172786	0.380154	0.056458	0.00902128	-0.140664	-0.0746219	0.103832	-0.29604	0.0721643	-0.102021	-0.104621	0.032682	0.107945	0.0978169	0.0484292	-0.0761511	0.0833722	0.0664321	0.127065	0.173114	0.229887	-0.0326275	0.228471	0.167381	0.159672	0.0611552	-0.119487	-0.105498	0.00471983	-0.190198	-0.104344	-0.0567639	0.293227	0.0598806	0.0152737	0.0449379	0.00754225
ICC9643	-0.163748	-0.330492	-0.320445	-0.297491	-0.275723	0.0507537	-0.428747	-0.225282	0.0912858	-0.172507	-0.466111	-0.395031	-0.0880614	-0.267819	-0.376647	-0.383503	-0.0248923	-0.279852	-0.137817	0.279122	-0.295908	0.00958799	-0.40766	-0.324464	-0.0197659	-0.130305	-0.286866	-0.538911	-0.301868	-0.344301	-0.30656	-0.259471	-0.223508	-0.565622	-0.370077	-0.233467	-0.318695	-0.420854	0.491053	-0.00117213	-0.0402698	-0.390746	0.070217	-0.451369	-0.0883717	-0.243159	-0.0546885	-0.0416726	0.184704
ICC9702	-0.127519	-0.052862	-0.00119442	-0.0812515	0.231342	0.0807393	0.0627104	0.0221727	-0.256438	-0.209635	-0.103679	-0.205325	-0.0143738	-0.195172	-0.107341	-0.162581	0.0305861	0.144492	-0.141128	-0.307402	0.064444	-0.234604	0.02865	0.0634611	-0.154183	-0.0566171	-0.178321	-0.0843917	-0.182918	-0.195176	-0.221947	0.0145175	-0.165948	-0.0871714	-0.11846	-0.134287	-0.138874	0.113265	0.024709	0.798801	0.00896554	-0.270235	0.714111	-0.142003	0.222035	-0.10704	0.0309652	-0.000241231	0.0742193
ICC9712	0.0155654	-0.184995	-0.132808	-0.0963261	-0.126585	-0.191865	-0.0558962	0.143927	-0.122198	-0.0436589	-0.0563217	0.0111172	0.447631	-0.0583303	-0.0984833	0.100684	0.140374	-0.145281	0.179886	-0.197614	-0.080696	-0.119613	-0.159151	-0.107692	0.0705831	-0.0925022	-0.0310742	-0.117155	0.178156	0.0467588	0.0085419	0.11286	0.0400883	-0.00599755	0.101624	0.252281	0.20087	-0.20148	0.0169181	0.385726	0.774803	0.157433	0.331732	-0.143551	0.597677	0.102118	0.817614	0.629808	0.361937
ICC9755	-0.111122	-0.243008	-0.17053	-0.159021	-0.101356	-0.198372	-0.139402	0.0890356	-0.212987	-0.0886652	-0.0118431	-0.11609	0.475982	-0.104897	-0.134125	0.133717	0.0724765	-0.107045	0.0459153	-0.173425	-0.163161	-0.242659	0.0939521	-0.180272	0.00528655	-0.221791	0.150754	-0.169965	0.141995	0.127136	0.0707094	0.086583	-0.0356134	-0.0343555	0.145062	0.201031	0.159505	-0.127347	0.125389	0.252275	0.897321	0.150926	0.199322	-0.186997	0.523536	0.0524297	0.961462	0.71955	0.144724
ICC9848	-0.116137	-0.303171	-0.183349	-0.297743	-0.339448	-0.268419	-0.145978	0.0694534	-0.275751	-0.244556	-0.316008	-0.15024	0.401252	-0.20512	-0.280131	-0.108017	-0.0891372	-0.137553	-0.126104	-0.13942	-0.268066	-0.33924	-0.0848302	-0.255522	-0.124071	-0.379763	-0.0228262	-0.31441	-0.00557205	-0.059971	-0.0643709	0.139317	-0.069763	-0.179841	-0.0597331	0.0180868	0.00205349	-0.215603	0.0173622	0.552654	0.824152	0.0455009	0.59855	-0.330921	0.824955	-0.075367	0.872165	0.639097	0.22087
ICC9862	-0.181235	-0.19242	-0.167806	-0.143811	-0.1543	-0.195648	0.042292	-0.0206169	-0.2831	-0.195716	-0.178724	-0.256438	0.136374	-0.1953	-0.0596049	-0.230344	-0.209383	-0.12149	-0.191722	-0.237295	-0.0100816	-0.225368	-0.0770913	-0.123961	-0.238073	-0.119177	-0.210706	-0.129262	-0.166398	-0.216114	-0.317283	0.191278	-0.231629	0.00634751	-0.249173	-0.0267207	-0.0484769	-0.165203	-0.131498	0.798672	0.334001	-0.277126	0.888791	-0.13849	0.638636	-0.0582634	0.351838	0.23791	0.300405
ICC9872	0.0174216	-0.160248	0.0131611	-0.107476	-0.215254	-0.240994	-0.0654857	0.0536969	-0.0886058	-0.0875857	-0.171524	-0.109808	-0.0504836	0.218744	-0.236057	-0.0660246	-0.21675	-0.145506	0.0641634	-0.0724554	-0.067394	-0.212445	0.0279179	-0.0444449	-0.00299862	-0.0698355	0.0306121	-0.203223	-0.0135246	0.105324	-0.0338241	0.268714	0.0653563	-0.10039	0.0691431	-0.026284	-0.0381553	-0.0268972	-0.204938	-0.214881	-0.0182999	-0.0945981	-0.210605	-0.0589732	0.146905	-0.102049	-0.0145094	0.00318878	-0.226183
ICC9895	-0.106417	-0.197723	-0.152819	-0.115817	-0.142955	-0.121351	0.0577995	0.00477558	-0.238458	-0.109453	-0.105988	-0.128034	0.236164	-0.170428	-0.083117	-0.126912	-0.120518	-0.0815302	-0.0711213	-0.220747	-0.0726133	-0.203617	-0.0610635	-0.12042	-0.113311	-0.125	-0.136409	-0.121039	-0.0588041	-0.129851	-0.212291	0.0944092	-0.151089	0.0411047	-0.110364	0.121454	0.0622385	-0.101832	-0.11547	0.686195	0.481655	-0.16537	0.724808	-0.102692	0.557375	0.0139526	0.501053	0.35799	0.283656
ICC9942	-0.0370665	-0.167392	-0.220297	-0.154681	-0.319167	-0.161775	-0.0242457	0.0205395	-0.180032	-0.124385	-0.187513	-0.0774127	0.232678	0.0789333	-0.184932	0.0173566	-0.0246341	-0.124556	-0.0621208	-0.16076	-0.118761	-0.299709	-0.246641	-0.182695	0.00286361	-0.161782	-0.0951518	-0.0693765	-0.0300336	-0.081311	-0.137737	-0.00896676	-0.146251	-0.0477039	-0.096681	0.094556	0.141995	-0.124567	-0.0508014	0.519868	0.416258	-0.1366	0.51686	-0.183176	0.640253	0.0474054	0.427332	0.337856	0.357169
ICC10018	0.707207	0.57376	0.397032	0.30761	0.75131	0.0814863	0.521287	0.515607	0.300468	0.342589	0.605144	0.974335	0.150256	0.399713	0.605644	0.44375	0.28418	0.257615	0.455839	-0.490307	0.357578	0.0855833	0.408147	0.394574	0.480763	0.170444	1.13817	0.465231	0.514459	0.613017	0.835971	-0.355162	1.04701	0.515518	1.30156	0.632285	0.598043	0.479235	-0.411564	-0.326819	-0.0553202	0.642531	-0.366245	0.42895	0.10052	0.432178	-0.0463271	0.0280796	-0.377661
ICC10341	0.625143	0.577539	0.344623	0.169879	0.322752	0.278283	0.25349	0.269661	0.614843	0.359375	0.424231	0.763766	0.00992245	0.356669	0.640639	0.22954	0.0965032	0.102715	0.426321	-0.261775	0.0715716	0.495687	0.0519057	0.381705	0.511075	0.378686	0.662786	0.207839	0.374126	0.368111	0.700841	-0.549082	0.822392	0.131182	0.929191	0.216734	0.245443	0.236411	0.0687752	-0.690864	-0.18941	0.525089	-0.631441	0.232429	-0.287977	0.236177	-0.180937	-0.0851999	-0.25162
ICC10393	-0.392457	-0.595619	-0.612626	-0.474173	-0.473737	-0.273163	-0.578376	-0.444626	-0.244077	-0.433993	-0.722394	-0.595645	-0.0170996	-0.257208	-0.55385	-0.248029	-0.182846	-0.340516	-0.401904	0.227823	-0.415882	-0.656661	-0.510986	-0.719657	-0.4982	-0.419364	-0.653965	-0.493442	-0.537861	-0.550119	-0.569086	0.20689	-0.584883	-0.596632	-0.60711	-0.396623	-0.397048	-0.652164	0.517792	0.562477	0.272093	-0.454532	0.676528	-0.629092	0.26145	-0.391227	0.314383	0.159875	0.728584
ICC10399	0.022628	0.157636	0.28318	0.00438352	0.205121	0.758952	0.109846	-0.052953	0.123665	-0.04388	-0.0763127	-0.106163	-0.242977	0.176087	0.0126315	-0.159668	-0.0528638	0.491818	-0.0544525	-0.0662085	0.0153313	0.383258	0.0711033	0.29685	0.0188561	0.435342	-0.202461	-0.0767958	-0.239314	-0.144398	-0.0244557	-0.26351	-0.0204831	0.0426859	-0.18318	-0.179237	-0.13388	0.222832	0.353826	-0.103021	-0.391324	-0.366691	-0.0680499	-0.0230714	-0.417054	-0.0162021	-0.393776	-0.297519	-0.0633378
ICC10466	0.475759	0.814189	0.610929	0.196343	0.37627	0.303707	0.384527	0.22433	0.175154	0.212072	0.410635	0.512411	0.0639609	0.247346	0.550565	0.050501	-0.167858	0.544868	0.288383	-0.57348	0.301458	0.0632808	0.327576	0.375913	0.0947975	0.328152	0.600806	0.211412	0.047333	0.0522439	0.466654	0.016894	0.483634	0.188342	0.536845	0.0356141	0.0513167	0.498034	-0.477048	-0.186279	-0.0474475	0.267491	-0.267327	0.294271	-0.0258344	0.124252	-0.0405355	0.0198241	-0.37239
ICC10673	0.454724	0.796275	0.816207	0.328785	0.617967	0.242611	0.475348	0.318272	0.174409	0.319541	0.470241	0.749946	0.0819452	0.26637	0.781336	0.171497	0.0181705	0.549326	0.403656	-0.549253	0.302274	0.183757	0.467301	0.523963	0.271462	0.466316	0.753538	0.316801	0.321286	0.276772	0.770783	-0.104552	0.622839	0.501315	0.690097	0.313729	0.333074	0.653367	-0.27333	-0.313448	-0.0435103	0.476411	-0.40438	0.41943	-0.184739	0.305598	-0.0303551	0.0201196	-0.506322
ICC10685	-0.143365	-0.251319	-0.260002	-0.0970972	0.0125944	-0.132285	-0.278819	-0.10761	-0.218177	-0.0943751	-0.27092	-0.251345	0.0592655	0.047032	-0.334413	0.0171912	0.0574019	0.030837	-0.0602051	0.0674689	0.0751317	-0.37063	0.14339	-0.273906	-0.154941	-0.16715	-0.0261224	-0.154865	-0.135812	-0.117895	-0.237272	0.239553	-0.301454	-0.125388	-0.120778	0.00178407	-0.0496271	-0.150745	0.361601	0.318882	0.109138	-0.0873404	0.15095	-0.19895	0.134913	-0.11144	0.121253	0.0879654	0.19052
ICC10755	-0.129718	-0.222584	-0.23751	-0.0865712	0.040289	-0.124361	-0.254246	-0.0970842	-0.191523	-0.0734439	-0.23178	-0.223131	0.0489811	0.0518351	-0.306718	0.0157512	0.0570024	0.0450048	-0.0590438	0.0816368	0.0820158	-0.354902	0.159119	-0.259738	-0.136091	-0.159746	-0.00154932	-0.137575	-0.124766	-0.0928013	-0.223105	0.204816	-0.284685	-0.112261	-0.0972458	0.00346563	-0.0448239	-0.142821	0.322702	0.268537	0.0733609	-0.0851386	0.131822	-0.175937	0.123588	-0.101434	0.0802729	0.0605123	0.128209
ICC10885	-0.670899	-0.929209	-0.777131	-0.617868	-0.819813	-0.40281	-0.901561	-0.747521	-0.184869	-0.609943	-1.07211	-0.878249	-0.341845	-0.842084	-0.918135	-0.493694	-0.391573	-0.613236	-0.835904	1.11997	-0.853524	-0.446057	-0.820123	-0.68126	-0.675191	-0.84452	-0.828875	-0.626731	-0.717453	-0.715144	-0.754921	0.221875	-0.83367	-0.996815	-1.03435	-0.812934	-0.790989	-0.964423	0.600932	0.0582417	-0.137975	-0.722569	0.176975	-0.874758	-0.15174	-0.69204	-0.150833	-0.234586	0.436615
ICC10939	-0.533414	-0.917107	-0.811333	-0.631259	-0.569952	-0.438052	-0.886858	-0.57778	-0.0484249	-0.571308	-0.930985	-0.808919	-0.261589	-0.831543	-0.912797	-0.470147	-0.265534	-0.755652	-0.765013	0.933851	-0.755059	-0.48234	-0.849642	-0.857493	-0.674535	-0.769987	-0.806888	-0.632318	-0.647082	-0.548524	-0.844271	0.0857022	-0.655085	-1.04402	-0.755871	-0.743084	-0.814265	-1.08967	0.50586	0.118728	-0.0686445	-0.683413	0.267636	-0.862656	-0.0735647	-0.687743	-0.0716174	-0.170978	0.492939
ICC10945	0.0229048	0.157392	0.283457	0.00361985	0.205918	0.756107	0.108562	-0.0542369	0.123941	-0.0441234	-0.0775967	-0.105366	-0.24374	0.175323	0.0103071	-0.159391	-0.0515464	0.491055	-0.0562567	-0.0643709	0.0161284	0.383535	0.0703397	0.295046	0.0196532	0.434578	-0.203745	-0.0770393	-0.240078	-0.144121	-0.0288612	-0.265314	-0.0222873	0.043483	-0.183944	-0.179481	-0.133603	0.219467	0.354103	-0.102744	-0.391567	-0.364333	-0.0672528	-0.0238351	-0.415737	-0.0138442	-0.39506	-0.299323	-0.0646217
ICC11121	0.337903	0.608179	0.56828	0.292084	0.126037	0.369793	0.56247	0.355969	0.0836008	0.212085	0.505336	0.322009	0.0889465	0.485118	0.412189	0.215957	0.0111246	0.566732	0.452799	-0.569305	0.483043	0.168907	0.416553	0.496627	0.267017	0.488925	0.290223	0.334727	0.212269	0.246835	0.216422	-0.0491662	0.262535	0.373568	0.317828	0.233326	0.234462	0.666091	-0.329801	-0.132679	-0.0396306	0.0734464	-0.227254	0.426951	-0.0268619	0.281904	-0.041563	0.0448097	-0.282892
ICC11198	0.526916	0.748807	0.468548	0.437916	0.918033	0.0843273	0.54806	0.451335	0.203419	0.340227	0.75626	0.721727	0.0292743	0.339603	0.785894	0.34514	0.115335	0.235484	0.404052	-0.567066	0.624191	0.226294	0.662275	0.493663	0.331167	0.360579	0.974524	0.576287	0.395039	0.447293	0.612499	-0.266998	0.840704	0.642181	1.18006	0.407772	0.418792	0.676134	-0.574166	-0.159575	-0.2533	0.564731	-0.1964	0.580586	-0.0100556	0.346054	-0.244307	-0.134002	-0.547547
ICC11279	0.565023	0.640721	0.438501	0.33035	0.527445	0.178623	0.387428	0.409842	0.199905	0.375733	0.498859	0.819665	0.117847	0.413088	0.535777	0.362957	0.287149	0.286598	0.492625	-0.458724	0.301237	0.144221	0.232667	0.427198	0.550846	0.235324	0.802446	0.426059	0.566853	0.512454	0.832177	-0.322017	0.919912	0.472704	0.999657	0.494264	0.551067	0.579494	-0.471026	-0.341018	-0.0663981	0.653304	-0.436633	0.476142	0.0842399	0.395607	-0.0579252	0.0138802	-0.31122
ICC11284	0.157134	0.0491799	0.0477808	0.146694	-0.0406841	0.205152	0.257359	0.341684	0.205624	0.275319	0.388559	0.227604	0.102235	-0.0104086	-0.0739734	0.571058	0.191938	0.012416	0.134681	0.0719395	0.0504675	0.570311	-0.000414033	0.360081	0.329731	-0.00191907	0.263972	0.253329	0.404008	0.465627	-0.0252175	-0.132646	0.177495	0.177712	0.33632	0.331418	0.343479	0.0711944	0.126751	-0.387845	0.0111172	0.330218	-0.497507	0.179069	-0.0817272	0.297274	-0.000700176	0.0372882	-0.217577
ICC11303	-0.189607	-0.330338	-0.2974	-0.176116	-0.371818	-0.241999	-0.191354	-0.16998	-0.145799	-0.119286	-0.298433	-0.254406	0.119677	-0.285354	-0.379614	-0.149751	-0.165729	-0.30363	-0.124656	0.217886	-0.335293	-0.219693	-0.434559	-0.230663	-0.19598	-0.282067	-0.307002	-0.16781	-0.0946501	-0.121475	-0.292359	0.0830155	-0.346135	-0.192441	-0.322579	-0.072552	-0.071937	-0.34162	-0.13987	0.107196	0.281406	-0.0290098	0.141647	-0.249354	0.251513	-0.0874463	0.284156	0.201964	0.255614
ICC11378	-0.506857	-0.694932	-0.702574	-0.38359	-0.120942	-0.0259812	-0.623061	-0.589722	-0.048921	-0.36526	-0.554292	-0.787044	-0.304226	-0.566185	-0.622987	-0.44411	-0.398176	-0.474166	-0.711922	0.866241	-0.465769	-0.0338501	-0.483874	-0.42253	-0.566817	-0.417225	-0.761081	-0.401818	-0.637693	-0.605729	-0.734471	0.201224	-0.764836	-0.695944	-0.764171	-0.597906	-0.703425	-0.671356	0.0137166	0.162974	-0.253833	-0.52523	0.16881	-0.532786	-0.295172	-0.518113	-0.268252	-0.319228	0.0928819
ICC11498	0.463919	0.559387	0.259878	0.547126	0.516867	-0.0130062	0.558421	0.53089	0.197131	0.631009	0.754134	0.71648	0.124958	0.549744	0.596475	0.468918	0.581445	0.147515	0.625119	-0.315304	0.464427	0.382327	0.419268	0.289156	0.611023	0.250239	0.879792	0.380624	0.931384	0.856174	0.845011	-0.527693	0.803721	0.978226	0.93133	0.784917	0.852646	0.43885	-0.319282	-0.563863	-0.0962258	1.19316	-0.542939	0.858361	-0.0928218	0.615505	-0.0757869	-0.0273933	-0.228671
ICC11584	0.267142	0.480709	0.412196	0.802455	0.405412	0.200182	0.731029	0.406949	0.0336501	0.541405	0.944431	0.489007	0.025469	0.464822	0.482939	0.35174	0.323796	0.279542	0.533434	-0.352882	0.577204	0.401978	0.56118	0.495061	0.473035	0.415043	0.422884	0.565718	0.808483	0.72599	0.468223	-0.339478	0.423291	1.21014	0.576392	0.766069	0.841081	0.669727	-0.457791	-0.331945	-0.244619	0.615553	-0.359926	1.06479	-0.149649	0.648163	-0.236667	-0.155497	-0.339086
ICC11627	0.201323	0.400323	0.310479	0.636226	0.553941	0.131762	0.698507	0.378069	0.0281818	0.52345	0.886937	0.4055	0.00907517	0.478083	0.493598	0.34419	0.317287	0.233494	0.455649	-0.287595	0.477569	0.365294	0.596813	0.412073	0.387446	0.374197	0.548521	0.527993	0.792609	0.825094	0.521544	-0.368878	0.323655	1.25514	0.56208	0.785573	0.866308	0.562808	-0.440368	-0.342096	-0.226155	0.628294	-0.326375	0.96463	-0.146793	0.652059	-0.213521	-0.15212	-0.349236
ICC11664	0.378613	0.446507	0.260936	0.454016	0.373292	0.0588066	0.632315	0.510096	0.111825	0.572756	0.841555	0.499548	0.181163	0.613233	0.411278	0.466333	0.497699	0.294766	0.605365	-0.418819	0.430106	0.379223	0.340725	0.404671	0.608959	0.263782	0.60355	0.367634	0.906948	0.668897	0.599984	-0.490218	0.485337	0.800313	0.654047	0.85725	0.88804	0.491413	-0.276604	-0.405687	-0.0296156	0.673958	-0.424303	0.689813	0.012808	0.65194	-0.0232238	0.0517032	-0.225533
ICC11764	0.358067	0.396306	0.370454	0.423584	0.271584	0.0028822	0.563384	0.518164	0.167757	0.51319	0.78563	0.571088	0.153333	0.647834	0.564499	0.403125	0.446977	0.186295	0.616035	-0.409711	0.333081	0.412263	0.262429	0.482974	0.628993	0.344166	0.420162	0.379343	0.880158	0.774774	0.741759	-0.463421	0.68226	0.663228	0.570549	0.705077	0.734307	0.43705	-0.166045	-0.423112	-0.019987	0.620635	-0.393864	0.665625	-0.0493595	0.557516	-0.00683183	0.0597709	-0.114974
ICC11879	-0.357297	-0.629133	-0.654985	-0.45254	-0.298626	-0.398243	-0.639984	-0.364203	-0.161572	-0.412879	-0.62116	-0.424176	-0.10212	-0.601318	-0.651876	-0.237321	-0.114388	-0.430739	-0.476518	0.467446	-0.434829	-0.674567	-0.56427	-0.724557	-0.554606	-0.644854	-0.5699	-0.451518	-0.473566	-0.439	-0.569823	0.472526	-0.508622	-0.675409	-0.530328	-0.464474	-0.548142	-0.716894	0.196053	0.364561	0.0335962	-0.286184	0.348026	-0.617864	0.137931	-0.486132	0.0217788	-0.028157	0.490087
ICC11903	0.0877015	0.0270911	0.0418201	0.202124	0.292045	0.00149235	0.149947	0.220225	0.128908	0.304216	0.391443	0.234649	0.0265597	0.103811	0.0314018	0.339824	0.684908	0.0980213	0.315494	0.0581748	0.116823	0.251673	0.096637	0.206366	0.337297	-0.042217	0.249687	0.298874	0.42354	0.417525	0.167562	-0.269192	0.192865	0.212852	0.243475	0.305167	0.315667	0.0792807	-0.032687	-0.118588	-0.132713	0.322696	-0.16946	0.239181	-0.128789	0.237206	-0.138807	-0.0935353	0.1292
ICC11944	-0.478016	-0.934025	-0.780907	-0.573259	-0.445879	-0.285365	-0.805966	-0.596779	-0.0476538	-0.512268	-0.855817	-0.690569	-0.237926	-0.660126	-0.818378	-0.544814	-0.26008	-0.652389	-0.678398	0.875312	-0.788105	-0.470643	-0.816615	-0.755271	-0.557226	-0.621461	-0.741605	-0.671087	-0.62446	-0.572206	-0.663489	-0.0852129	-0.64599	-0.813297	-0.757181	-0.55866	-0.618916	-0.961435	0.323499	0.124701	-0.0538263	-0.622812	0.272569	-0.767198	-0.093604	-0.558467	-0.0609613	-0.150437	0.480703
ICC12028	0.561831	0.806614	0.546645	0.459304	0.894679	0.179072	0.57257	0.400407	0.226368	0.373582	0.858289	0.797743	-0.0138498	0.383362	0.892606	0.307739	0.236093	0.400984	0.411914	-0.506138	0.473893	0.287742	0.718	0.506728	0.417068	0.329421	0.968339	0.595594	0.419028	0.400527	0.846154	-0.269542	0.806944	0.617787	1.02144	0.367249	0.447464	0.774001	-0.543413	-0.385831	-0.261567	0.669882	-0.42942	0.649318	-0.274291	0.365361	-0.255695	-0.152674	-0.561016
ICC12037	-0.384118	-0.380736	-0.183396	-0.294148	-0.540836	-0.248696	-0.27713	-0.44253	-0.311696	-0.41889	-0.496586	-0.541523	0.0250565	-0.294131	-0.350933	-0.407734	-0.496548	-0.21876	-0.32489	0.127427	-0.420029	-0.369462	-0.201935	-0.324764	-0.575704	-0.203961	-0.420873	-0.371686	-0.586751	-0.518368	-0.384378	0.589297	-0.637935	-0.291223	-0.682012	-0.484532	-0.456864	-0.321263	-0.083615	0.218599	0.405295	-0.465442	0.35346	-0.381433	0.0882181	-0.389131	0.435619	0.253016	0.264005
ICC12155	0.42917	0.606839	0.679317	0.264211	0.529981	0.118207	0.526273	0.299481	0.235218	0.284622	0.477983	0.7811	0.0886473	0.239256	0.812491	0.247914	0.081581	0.313066	0.322434	-0.542551	0.244464	0.198783	0.42718	0.370945	0.201685	0.384574	0.861171	0.328705	0.33111	0.293879	0.796214	-0.0192902	0.728911	0.497092	0.731137	0.310026	0.317404	0.524281	-0.254662	-0.425365	-0.0014304	0.539822	-0.247323	0.328843	-0.349203	0.296692	0.02213	0.0387877	-0.416378
ICC12299	0.430522	0.606111	0.665062	0.275969	0.508443	0.104473	0.468836	0.27378	0.2553	0.305745	0.458525	0.786615	0.0993647	0.222919	0.739966	0.244585	0.0813729	0.302973	0.308179	-0.50582	0.247897	0.200136	0.390553	0.328075	0.196275	0.358353	0.832348	0.330578	0.291362	0.27078	0.722649	-0.0340657	0.70269	0.423527	0.669018	0.282244	0.28442	0.481411	-0.253309	-0.426614	-0.0229692	0.489669	-0.255335	0.314067	-0.341607	0.275674	-0.0202193	0.0208907	-0.398377
ICC12307	0.382998	0.58564	0.406832	0.39701	0.928113	-0.0101652	0.501432	0.421875	0.184364	0.431468	0.736685	0.662613	0.0757727	0.265401	0.732502	0.289667	0.25548	0.191977	0.418294	-0.489352	0.530219	0.320136	0.568302	0.468886	0.392753	0.29314	0.961713	0.481794	0.601257	0.505237	0.733915	-0.385422	0.800839	0.623127	0.944056	0.477162	0.456966	0.457819	-0.509979	-0.267594	-0.178187	0.73193	-0.174354	0.592747	-0.078535	0.353533	-0.171796	-0.101031	-0.468272
ICC12324	0.48797	0.515804	0.342199	0.317289	0.652774	0.12082	0.336388	0.301053	0.252918	0.299201	0.45042	0.617229	0.0590035	0.140417	0.441035	0.214108	0.0285255	0.212666	0.199664	-0.351604	0.316791	0.134802	0.304409	0.337659	0.146028	0.178561	0.610416	0.346405	0.167759	0.222615	0.389901	-0.106163	0.572323	0.325416	0.687446	0.268416	0.253423	0.345842	-0.417493	-0.143893	-0.145532	0.2745	-0.168752	0.32053	-0.0458793	0.244677	-0.15995	-0.0798208	-0.384111
ICC12328	-0.247152	-0.419618	-0.457956	-0.261754	-0.238426	-0.169999	-0.446077	-0.350827	0.0453411	-0.237181	-0.438179	-0.324437	-0.188113	-0.362148	-0.389815	-0.222904	-0.193619	-0.294581	-0.404352	0.630658	-0.338211	-0.209083	-0.380248	-0.364686	-0.360699	-0.350537	-0.343736	-0.271138	-0.366542	-0.324173	-0.364471	0.0233898	-0.350613	-0.43884	-0.403015	-0.357451	-0.369322	-0.507899	0.149079	-0.0195429	-0.172578	-0.247836	0.0617312	-0.398464	-0.0963372	-0.315116	-0.183355	-0.187507	0.109105
ICC12379	-0.327096	-0.345045	-0.217419	-0.271463	-0.555609	-0.398217	-0.222709	-0.260645	-0.20785	-0.308801	-0.430719	-0.391894	-0.0407027	-0.431687	-0.282465	-0.253423	-0.44837	-0.392214	-0.321454	0.0382563	-0.32919	-0.289547	-0.474238	-0.197506	-0.508277	-0.24995	-0.635427	-0.326629	-0.402784	-0.379144	-0.484995	0.844539	-0.426395	-0.417333	-0.639037	-0.516995	-0.538751	-0.431244	-0.212326	0.275622	0.221437	-0.344948	0.352734	-0.345221	0.0973765	-0.424195	0.248119	0.127947	0.301258
ICC12492	0.118592	0.25412	0.129939	0.422389	0.114311	-0.0623047	0.337436	0.233947	-0.0222929	0.333546	0.339612	0.261378	0.0480855	0.277773	0.315139	0.217758	-0.072918	-0.0157209	0.248055	-0.277199	0.603983	0.0375205	0.51096	0.10511	0.132509	0.334127	0.184329	0.369824	0.293149	0.294938	0.101163	0.0738552	0.198783	0.678681	0.271764	0.467684	0.405347	0.285499	-0.16724	-0.0164214	-0.0856942	0.403012	-0.10007	0.480778	0.0560994	0.287346	-0.0772213	-0.0433951	-0.243633
ICC12537	-0.0586127	-0.225357	-0.0680759	-0.197038	-0.377652	-0.351886	-0.2206	-0.057195	-0.0980467	-0.173505	-0.327679	-0.184802	-0.12964	0.191614	-0.316774	-0.151944	-0.28446	-0.247553	0.00373691	-0.0142623	-0.080997	-0.302526	-0.0736092	-0.147533	-0.0925598	-0.103208	-0.0563477	-0.300068	-0.145747	-0.0164938	-0.142635	0.324305	-0.0455356	-0.26695	-0.0407083	-0.190763	-0.203154	-0.121661	-0.195129	-0.209234	-0.139077	-0.202889	-0.137845	-0.182872	0.298225	-0.215022	-0.14257	-0.0879332	-0.133653
ICC12654	0.114164	0.0134937	0.158808	-0.12311	-0.0555599	-0.198879	-0.00256011	0.17229	-0.0490919	-0.0995777	-0.0477281	0.0171095	0.0644681	0.278548	-0.0206949	0.0452854	-0.111683	-0.0191081	0.0896302	-0.306079	0.0470375	-0.118824	0.0133246	0.0772703	0.107271	0.03263	0.186144	-0.0648596	0.0535631	0.0350622	0.0930937	0.209378	0.20476	-0.174813	0.198662	0.0402834	0.0154056	0.0662036	-0.0842635	-0.119699	0.078963	-0.0956646	-0.0982548	-0.110505	0.281107	-0.0417247	0.0775509	0.107735	-0.120076
ICC12726	0.478173	0.61318	0.512411	0.42403	0.738705	0.134954	0.461338	0.326113	0.212945	0.374726	0.635721	0.851955	0.053368	0.527059	1.12839	0.156447	0.229434	0.287671	0.463524	-0.513318	0.448505	0.346115	0.440805	0.461569	0.443185	0.569885	0.631313	0.450025	0.480003	0.296579	1.03459	-0.312099	0.895493	0.644944	0.78066	0.445392	0.480865	0.574324	-0.351332	-0.261385	-0.139201	0.741261	-0.210806	0.589072	-0.186263	0.391478	-0.126566	-0.0776524	-0.289336
ICC12824	-0.0219231	-0.0840944	0.084632	-0.137977	-0.225464	-0.186692	-0.0751756	0.0533717	-0.123268	-0.096235	-0.159363	-0.149153	0.0105821	0.282411	-0.223376	-0.0793563	-0.256615	-0.0422988	0.0539533	-0.183076	-0.0536721	-0.220054	0.175867	-0.0260406	0.00448014	-0.0602757	0.125495	-0.196785	0.0288117	0.139856	0.0745854	0.134681	0.0624298	-0.0882286	0.084946	-0.0219268	-0.0405615	0.0700665	0.00960472	-0.244861	0.0911501	-0.0678696	-0.207809	-0.0514944	0.199127	-0.103415	0.102745	0.100673	-0.111531
ICC12851	-0.0412508	-0.223082	-0.0449912	-0.259276	-0.350405	-0.395395	-0.189711	-0.00549587	-0.129589	-0.251351	-0.287426	-0.1664	-0.0160293	0.0685057	-0.284845	0.102137	-0.15212	-0.236434	-0.0741091	-0.0619331	-0.150519	-0.181112	-0.154057	0.0638866	-0.0627116	-0.188338	-0.0296211	-0.0152917	-0.132027	-0.144285	-0.129955	0.48734	-0.0172482	-0.384335	-0.00825883	-0.159354	-0.177468	-0.123029	-0.0643505	0.0261174	0.0739035	-0.299984	-0.0242346	-0.278406	0.251075	-0.211187	0.0683292	0.0704196	0.0418684
ICC12866	0.39855	0.445634	0.259022	0.421927	0.45566	-0.0471595	0.531031	0.550844	0.239456	0.56564	0.688245	0.762447	0.0882032	0.352228	0.408324	0.527891	0.508272	0.0571733	0.557148	-0.257891	0.294485	0.306553	0.27586	0.382467	0.530567	0.120877	0.857085	0.397456	1.03614	1.2221	0.764554	-0.515023	0.806506	0.78071	0.92371	0.681049	0.709237	0.33134	-0.367483	-0.564719	-0.160554	1.01698	-0.564086	0.6494	-0.127495	0.528805	-0.155203	-0.0776747	-0.239413
ICC12916	0.400139	0.445662	0.255928	0.417272	0.454648	-0.0320441	0.543025	0.555554	0.234802	0.558384	0.678388	0.756232	0.0809474	0.364222	0.423439	0.535203	0.499455	0.0572012	0.556656	-0.266188	0.293472	0.310223	0.277969	0.401224	0.535277	0.127669	0.85295	0.398524	1.03305	1.22577	0.771346	-0.520718	0.804973	0.780738	0.935704	0.685759	0.709786	0.344895	-0.35757	-0.571455	-0.162607	1.01492	-0.566139	0.647867	-0.13267	0.530914	-0.157776	-0.0844102	-0.247709
ICC12928	0.207822	0.422951	0.345593	0.681745	0.316438	0.119532	0.73206	0.374683	-0.00954091	0.567409	0.892916	0.408357	0.0119329	0.411226	0.412174	0.31115	0.339915	0.209818	0.478277	-0.343526	0.545459	0.434225	0.511746	0.375912	0.415797	0.353642	0.450969	0.470501	0.772576	0.689562	0.373526	-0.290062	0.349924	1.15863	0.476493	0.744208	0.814538	0.582314	-0.425024	-0.340279	-0.244108	0.621267	-0.315713	0.975292	-0.163706	0.624221	-0.245	-0.170073	-0.297474
ICC12947	0.24912	0.356554	0.255785	0.495168	0.158476	0.0723854	0.553808	0.476331	0.105634	0.742413	0.684488	0.486073	0.143756	0.554495	0.333291	0.378981	0.472258	0.162151	0.636633	-0.337607	0.426516	0.393842	0.323609	0.342812	0.552823	0.342394	0.456368	0.288606	0.920527	0.869249	0.48818	-0.509416	0.435444	0.887249	0.513628	0.759493	0.810053	0.364001	-0.201634	-0.409797	-0.0592184	0.816562	-0.438298	0.77987	0.00193458	0.603608	-0.0559482	0.00493165	-0.117267
ICC13077	-0.681696	-0.791732	-0.669829	-0.592767	-0.559034	-0.264813	-0.827035	-0.856127	-0.0988977	-0.629585	-0.919547	-0.927546	-0.416634	-0.853401	-0.741638	-0.652246	-0.607873	-0.448705	-0.857627	0.876095	-0.715006	-0.486509	-0.618133	-0.786745	-0.879006	-0.545761	-0.949967	-0.682271	-0.972773	-0.906472	-0.879136	0.331258	-1.03853	-0.948823	-1.14659	-0.942871	-0.978154	-0.924755	0.491285	0.142652	-0.26427	-0.867073	0.294162	-0.876191	-0.321737	-0.757465	-0.272446	-0.328625	0.284827
ICC13124	-0.503462	-0.642112	-0.373495	-0.433262	-0.415137	0.125168	-0.536945	-0.63315	-0.045006	-0.500776	-0.714779	-0.761278	-0.432458	-0.724072	-0.769948	-0.378284	-0.440565	-0.180986	-0.803215	0.866514	-0.696492	-0.174048	-0.536668	-0.465959	-0.740832	-0.443485	-0.656755	-0.347438	-0.891828	-0.697542	-0.853338	0.363299	-0.836359	-0.655611	-0.918415	-0.779725	-0.76038	-0.629982	0.140413	0.0748028	-0.377903	-0.801215	0.0874024	-0.64593	-0.444734	-0.562062	-0.399085	-0.401157	0.0666217
ICC13187	-0.565006	-0.823836	-0.714939	-0.666492	-0.739932	-0.293275	-0.982961	-0.720186	-0.109151	-0.546191	-1.0453	-0.84051	-0.226587	-0.61705	-0.7701	-0.736896	-0.292963	-0.508903	-0.640525	0.82162	-0.911513	-0.427047	-0.897362	-0.907813	-0.601034	-0.599716	-0.816108	-1.02705	-0.71145	-0.762207	-0.624575	0.166488	-0.851599	-0.98665	-1.06736	-0.788722	-0.758452	-1.0016	0.782264	0.127717	0.0620861	-0.732693	0.263098	-0.861471	-0.0328393	-0.636092	0.0544308	-0.0641795	0.633554
ICC13219	0.343668	0.577526	0.445541	0.268195	0.32482	0.148204	0.230586	0.148427	0.207986	0.332828	0.318605	0.482292	0.0380036	0.1652	0.340435	0.0687659	0.00076213	0.368555	0.247338	-0.278436	0.215671	0.165828	0.290693	0.2792	0.179656	0.187737	0.466114	0.224475	0.157684	0.187568	0.362658	-0.16098	0.398887	0.21181	0.408917	0.0674058	0.101318	0.387274	-0.283975	-0.207554	-0.130634	0.315931	-0.249062	0.309415	-0.102777	0.132111	-0.139329	-0.0784495	-0.334875
ICC13283	-0.483938	-0.782828	-0.758734	-0.525074	-0.616723	-0.255389	-0.803564	-0.585532	-0.0275624	-0.422461	-0.856016	-0.730828	-0.245409	-0.506327	-0.670303	-0.653227	-0.138018	-0.555299	-0.539687	0.836094	-0.802871	-0.253893	-0.991622	-0.780442	-0.491872	-0.499919	-0.897882	-0.833087	-0.523208	-0.581249	-0.62831	-0.0432706	-0.740876	-0.786442	-0.945714	-0.609845	-0.577494	-0.970999	0.622971	0.104212	-0.0753558	-0.630295	0.270809	-0.687276	-0.0313714	-0.480106	-0.0934163	-0.163122	0.778094
ICC13357	-0.662378	-0.920168	-0.858615	-0.555239	-0.415373	-0.304284	-0.844135	-0.703101	-0.184672	-0.672178	-0.913755	-0.921754	-0.418647	-0.946459	-0.76238	-0.604313	-0.478259	-0.638011	-1.0282	0.986979	-0.662911	-0.418286	-0.724198	-0.741933	-0.877896	-0.685643	-1.03002	-0.513637	-0.837437	-0.744602	-0.993004	0.245484	-0.916715	-0.911816	-1.01958	-0.879331	-0.938546	-0.979314	0.38366	0.409095	-0.265762	-0.814458	0.495572	-0.828258	-0.177035	-0.761558	-0.27758	-0.364974	0.329638
ICC13441	-0.338623	-0.520454	-0.466706	-0.353746	-0.349667	-0.109554	-0.365862	-0.233673	-0.194925	-0.298998	-0.47086	-0.405503	0.0585855	-0.161753	-0.357984	-0.223329	0.163375	-0.24194	-0.295003	0.0985248	-0.42656	-0.3505	-0.628838	-0.533676	-0.289328	-0.308301	-0.635508	-0.407872	-0.175512	-0.239796	-0.284776	-0.0285416	-0.389018	-0.370071	-0.515296	-0.208561	-0.178812	-0.550466	0.608565	0.516941	0.326968	-0.222248	0.570121	-0.454558	0.180016	-0.206807	0.361454	0.193939	0.959827
ICC13461	-0.430079	-0.776313	-0.647647	-0.491506	-0.866177	-0.513167	-0.773118	-0.495255	-0.0423787	-0.432075	-0.825569	-0.590606	-0.184787	-0.51438	-0.594073	-0.485952	-0.459788	-0.766774	-0.533173	0.824919	-0.729763	-0.279114	-0.95077	-0.644903	-0.448939	-0.482479	-0.831537	-0.66321	-0.439175	-0.469121	-0.459474	0.167707	-0.576723	-0.730503	-0.846593	-0.556507	-0.528838	-0.912458	0.315767	-0.18114	0.0539403	-0.379778	-0.0400357	-0.659431	0.141106	-0.460065	0.0421229	-0.0463122	0.308569
ICC13523	-0.404979	-0.738206	-0.607979	-0.472648	-0.801017	-0.469337	-0.717842	-0.46131	-0.033406	-0.414258	-0.776016	-0.567066	-0.174774	-0.493442	-0.547122	-0.446804	-0.436248	-0.721383	-0.504951	0.797994	-0.679169	-0.24673	-0.86792	-0.577661	-0.435804	-0.444372	-0.77366	-0.621982	-0.40627	-0.436217	-0.434373	0.165754	-0.540696	-0.675227	-0.786115	-0.526724	-0.497494	-0.845216	0.281558	-0.181012	0.0306567	-0.357278	-0.0378264	-0.622364	0.108978	-0.430282	0.0151975	-0.0519069	0.280083
ICC13524	-0.0747836	-0.178576	-0.015052	-0.199161	-0.293933	-0.227066	-0.19619	0.0390106	-0.193818	-0.19748	-0.208582	-0.103164	0.742276	-0.0628361	-0.122239	0.0295846	-0.0280139	-0.148226	-0.0020287	-0.129803	-0.26053	-0.154294	-0.160536	-0.201162	-0.0629476	-0.150595	-0.0329787	-0.207504	-0.0339337	-0.106022	0.0352517	0.251946	0.0152923	-0.189994	-0.0428321	0.0594402	-0.0127814	-0.157602	0.033743	0.247513	1.32958	-0.0619405	0.303294	-0.286446	0.440734	-0.0282908	1.35106	1.07897	0.231008
ICC13599	-0.42785	-0.772003	-0.645417	-0.488235	-0.850941	-0.500532	-0.762043	-0.486262	-0.0417098	-0.430886	-0.818657	-0.588897	-0.18672	-0.51059	-0.58404	-0.482161	-0.457559	-0.757261	-0.530423	0.821426	-0.72181	-0.272202	-0.931372	-0.630707	-0.44775	-0.469844	-0.817862	-0.660981	-0.424979	-0.455966	-0.453603	0.167855	-0.567209	-0.718908	-0.83708	-0.545433	-0.525568	-0.894101	0.305511	-0.184633	0.0447242	-0.371305	-0.0435288	-0.651479	0.134492	-0.454714	0.027184	-0.052927	0.306637
ICC13628	-0.27855	-0.119089	-0.211014	-0.115743	-0.0481926	0.175793	-0.110691	-0.207417	-0.237863	-0.19054	-0.193318	-0.388611	-0.128465	-0.150064	-0.320802	-0.114351	0.070492	0.115203	-0.190707	-0.00320301	0.0778166	-0.311237	0.0862448	-0.273302	-0.316659	-0.156662	-0.411032	-0.0361616	-0.354238	-0.286896	-0.43853	0.26565	-0.516759	-0.188256	-0.380826	-0.377923	-0.351815	-0.033603	0.131729	0.474523	-0.0770318	-0.309408	0.395037	-0.1869	0.0418702	-0.2383	-0.0716806	-0.0909209	0.260839
ICC13719	-0.433483	-0.613754	-0.626599	-0.392418	-0.160985	-0.00411346	-0.613159	-0.490335	-0.169605	-0.522363	-0.70359	-0.668928	-0.302649	-0.756064	-0.570944	-0.469066	-0.33989	-0.344084	-0.724912	0.594681	-0.293546	-0.317376	-0.479696	-0.451648	-0.513213	-0.432296	-0.860954	-0.448105	-0.691264	-0.726413	-0.803649	0.207484	-0.72632	-0.656908	-0.804214	-0.599971	-0.645659	-0.609428	0.188541	0.581801	-0.28087	-0.830606	0.499713	-0.614451	0.15227	-0.518096	-0.302052	-0.308286	-0.0215589
ICC13764	0.299379	0.237728	0.236329	0.360215	0.301862	-0.081298	0.585337	0.550522	0.0794145	0.444097	0.651505	0.328748	0.218988	0.620882	0.371064	0.38918	0.464248	0.116162	0.520929	-0.421575	0.370122	0.386872	0.320801	0.359254	0.515678	0.241777	0.539404	0.281116	0.913557	0.685391	0.606594	-0.373313	0.600681	0.755937	0.601346	0.907041	0.913899	0.345586	-0.234617	-0.381389	0.103937	0.543739	-0.233001	0.59133	0.0594774	0.652306	0.123336	0.153	-0.142445
ICC13816	-0.390761	-0.483107	-0.216572	-0.326284	-0.239483	-0.227244	-0.439331	-0.314946	-0.229374	-0.472876	-0.639537	-0.461802	-0.16836	-0.681605	-0.416885	-0.156847	-0.187913	-0.155168	-0.60519	0.184777	-0.334065	-0.406279	-0.27257	-0.351696	-0.713453	-0.487903	-0.454049	-0.28156	-0.588711	-0.581199	-0.513802	1.40571	-0.478094	-0.507011	-0.654318	-0.587943	-0.605017	-0.472018	0.215656	0.35711	0.0105375	-0.606312	0.379594	-0.549357	-0.18792	-0.475894	0.0174495	-0.0590196	0.239153
ICC13863	-0.108957	-0.267377	-0.153278	-0.261429	-0.522684	-0.409514	-0.330774	-0.171011	-0.128621	-0.229572	-0.439414	-0.273646	-0.105066	0.0694738	-0.402496	-0.14506	-0.32596	-0.30154	-0.0892691	-0.0141415	-0.154233	-0.434552	-0.0885761	-0.320659	-0.208457	-0.193613	-0.131145	-0.340007	-0.269449	-0.144357	-0.212229	0.504437	-0.193169	-0.400016	-0.142038	-0.265039	-0.332058	-0.162121	-0.0285249	-0.160209	-0.0166945	-0.329191	-0.172061	-0.290965	0.110011	-0.315832	-0.0144648	0.00479416	-0.0809858
ICC13892	0.0302963	-0.0381181	0.0869063	-0.137784	-0.215906	-0.197944	-0.127009	-0.00574485	-0.0372318	-0.11165	-0.181021	-0.0532317	0.0237818	0.0838646	-0.156069	-0.0583526	-0.196592	-0.0795644	-0.0311764	-0.0965193	-0.0409926	-0.175638	-0.0231996	-0.0659075	-0.00729263	-0.0782916	0.0871887	-0.136762	-0.114587	-0.0987509	0.0107865	0.227481	0.0178806	-0.298221	0.0195863	-0.111219	-0.148583	0.0281186	-0.107781	-0.13073	0.0299525	-0.202424	-0.107205	-0.175123	0.187874	-0.133917	0.0186554	0.0524817	-0.194579
ICC14051	0.0634834	-0.0127349	0.127377	-0.0733807	-0.139017	-0.192851	0.0305211	0.0955965	-0.0451454	-0.0441253	-0.103612	0.0106508	0.0533271	0.21278	-0.0890647	0.0320633	-0.129067	-0.0739511	0.0618408	-0.250106	0.0306939	-0.104472	-0.00666089	0.0567646	0.0867651	0.0136851	0.133382	-0.0562307	0.0804012	0.0681434	0.0460546	0.222689	0.146276	-0.139651	0.129252	0.0551555	0.0136293	0.0430965	-0.0319326	-0.122516	0.0412886	-0.0990017	-0.113038	-0.0493298	0.190886	-0.0169676	0.0357144	0.072142	-0.0630628
ICC14077	0.0190846	-0.195003	0.0293914	-0.140671	-0.183936	-0.258061	-0.0929574	0.0173808	-0.0900644	-0.149395	-0.209401	-0.0680852	0.0167323	0.0971053	-0.200057	-0.0425106	-0.204682	-0.13916	0.00547607	-0.0687114	-0.147412	-0.192052	-0.11089	-0.0380995	0.0116709	-0.109273	0.0510045	-0.165662	-0.00874007	-0.0131939	0.0323513	0.313038	0.0743029	-0.155955	0.0557185	0.0544587	0.0295809	-0.0309571	-0.144486	-0.184603	0.0483958	-0.212595	-0.193855	-0.142633	0.220885	-0.0410762	0.0464634	0.0605197	-0.174575
ICC14098	-0.0573306	-0.250608	-0.0766788	-0.188992	-0.175549	-0.253315	-0.259898	-0.0860881	-0.0941633	-0.162338	-0.257722	-0.133575	0.0350046	0.0846822	-0.218203	-0.0284004	-0.275894	-0.0823887	-0.084466	0.102518	-0.14943	-0.169098	-0.0790906	0.00774664	-0.0767104	-0.113372	-0.0352957	-0.142707	-0.146026	-0.179094	-0.034179	0.341715	-0.0296862	-0.266708	-0.0789661	-0.0760638	-0.108225	-0.159919	-0.128815	-0.0419885	0.0958028	-0.223978	-0.0928608	-0.195637	0.254765	-0.149227	0.0855462	0.0694274	0.0299507
ICC14199	-0.721101	-0.77911	-0.698308	-0.621246	-0.625491	-0.202246	-0.796204	-0.814891	-0.124775	-0.607078	-0.855939	-0.988281	-0.4987	-0.895407	-0.833589	-0.569909	-0.519813	-0.474582	-0.929287	0.882473	-0.672209	-0.41978	-0.537878	-0.735103	-0.793547	-0.632509	-0.936305	-0.535941	-0.988246	-0.85379	-0.97837	0.347522	-1.06024	-1.09436	-1.1116	-1.05875	-1.08311	-0.795595	0.395172	0.193774	-0.381193	-0.893991	0.265163	-0.888021	-0.35854	-0.828605	-0.398213	-0.434102	0.14137
ICC14402	0.437291	0.668027	0.477773	0.248921	0.152069	0.244428	0.452193	0.506343	0.112234	0.341128	0.532408	0.500997	0.11862	0.677113	0.424693	0.40431	0.248382	0.389862	0.521492	-0.590617	0.416468	0.201182	0.450389	0.479997	0.583355	0.370324	0.512913	0.381049	0.520282	0.517909	0.551489	-0.317603	0.49407	0.368384	0.668503	0.475787	0.526347	0.700447	-0.175785	-0.313712	-0.0260852	0.34244	-0.450947	0.392632	0.0980194	0.403664	-0.00304507	0.0947734	-0.308366
ICC14595	0.485819	0.958476	0.578847	0.370806	0.519517	0.264341	0.475748	0.290578	0.186254	0.370926	0.551281	0.545363	-0.0144239	0.478516	0.663637	0.133397	-0.0646719	0.427984	0.473771	-0.604521	0.4754	0.210689	0.424519	0.501471	0.245328	0.513019	0.533346	0.361943	0.294632	0.363535	0.642157	-0.212367	0.519706	0.480904	0.646795	0.187705	0.220576	0.643881	-0.443056	-0.328136	-0.239249	0.451838	-0.425832	0.513996	-0.215035	0.232641	-0.239621	-0.125154	-0.479909
ICC14669	0.491549	0.955882	0.573652	0.376536	0.514322	0.251342	0.456506	0.28018	0.198227	0.379258	0.543484	0.554735	-0.00869362	0.47072	0.640232	0.133925	-0.0605024	0.427471	0.471697	-0.586825	0.477489	0.208096	0.395912	0.476506	0.247416	0.507304	0.527111	0.36299	0.285275	0.35886	0.617712	-0.2134	0.514511	0.453338	0.629634	0.18199	0.210179	0.630362	-0.447211	-0.335933	-0.247046	0.432076	-0.432068	0.514524	-0.213987	0.234209	-0.259383	-0.128789	-0.47522
ICC14778	0.390009	0.616062	0.425288	0.427953	0.7676	0.0863303	0.36329	0.326914	0.170564	0.418188	0.582414	0.712285	0.0598917	0.328079	0.789978	0.163491	0.223991	0.256736	0.393569	-0.409505	0.399881	0.305816	0.396343	0.470694	0.386757	0.417729	0.548352	0.412846	0.406927	0.318711	0.773181	-0.333669	0.666338	0.540652	0.605092	0.369195	0.402066	0.484079	-0.341167	-0.189308	-0.160251	0.611477	-0.206363	0.562299	-0.0194983	0.338172	-0.160623	-0.0940202	-0.316109
ICC14799	0.287567	0.600505	0.718245	0.405111	0.34988	0.2846	0.590694	0.41853	0.0369073	0.307423	0.657903	0.550534	0.0885563	0.359865	0.546546	0.286323	0.2615	0.450324	0.478942	-0.504142	0.442072	0.382864	0.545708	0.683011	0.528318	0.433908	0.48389	0.580421	0.487097	0.473278	0.498533	-0.268066	0.53112	0.51677	0.553116	0.406704	0.433332	0.991385	-0.34892	-0.211109	-0.0878849	0.31862	-0.284352	0.534255	-0.0902037	0.39337	-0.0825336	0.0012378	-0.461211
ICC14815	0.534067	0.657629	0.43616	0.318644	0.562563	-0.0333837	0.333581	0.432994	0.219935	0.407209	0.535017	0.867269	0.101459	0.490867	0.827383	0.291421	0.406549	0.160954	0.579769	-0.520375	0.400347	0.179338	0.384323	0.361905	0.610936	0.284489	0.931211	0.333713	0.627984	0.490343	1.02441	-0.46691	0.970637	0.442269	0.958816	0.4477	0.515949	0.524606	-0.218959	-0.42348	-0.0874686	0.848662	-0.444697	0.500854	0.0407981	0.371935	-0.0789958	0.000613484	-0.278704
ICC14831	0.49908	0.526393	0.350707	0.318514	0.559831	-0.0257099	0.270499	0.356905	0.300966	0.415923	0.468814	0.824998	0.107572	0.329456	0.524461	0.318865	0.302887	0.127528	0.479748	-0.315522	0.251943	0.139148	0.247364	0.421605	0.501551	0.181867	0.762516	0.404859	0.519119	0.526111	0.744383	-0.474324	0.842523	0.322999	0.872843	0.366409	0.381071	0.386607	-0.326263	-0.368462	-0.125058	0.630542	-0.407368	0.423725	-0.0103176	0.284922	-0.135834	-0.0458199	-0.302766
ICC15248	-0.328223	-0.459069	-0.349653	-0.454162	-0.915717	-0.236503	-0.56877	-0.441783	-0.0253253	-0.348948	-0.710707	-0.609451	-0.124552	-0.352174	-0.628526	-0.236862	-0.494241	-0.465658	-0.385014	0.372177	-0.467146	-0.215758	-0.392645	-0.521716	-0.298699	-0.339522	-0.418045	-0.467707	-0.610976	-0.559242	-0.52098	0.603571	-0.525852	-0.785765	-0.689069	-0.582115	-0.544561	-0.529661	0.376003	-0.208829	0.0709937	-0.589038	-0.090096	-0.621567	0.124343	-0.426884	0.0654195	0.030051	0.0259521
ICC15264	-0.583917	-0.68875	-0.715642	-0.359199	-0.421194	-0.0400895	-0.525834	-0.649093	-0.155116	-0.414226	-0.635514	-0.749126	-0.499386	-0.837823	-0.783809	-0.591925	-0.265571	-0.477349	-0.660477	0.816755	-0.575086	-0.326819	-0.695162	-0.494908	-0.637114	-0.539548	-0.842823	-0.406562	-0.676774	-0.433584	-0.957725	-0.106832	-0.943867	-0.581028	-0.870886	-0.772255	-0.739384	-0.674539	-0.0388911	0.201932	-0.478127	-0.510724	0.283727	-0.531287	-0.302517	-0.586849	-0.508674	-0.51907	0.15057
ICC15294	-0.349467	-0.621303	-0.497319	-0.389562	-0.365714	-0.308212	-0.416766	-0.245037	-0.195363	-0.374354	-0.535291	-0.409583	-0.0854452	-0.164272	-0.344376	-0.202437	0.144728	-0.237696	-0.27307	0.241158	-0.510761	-0.325446	-0.653208	-0.382199	-0.346475	-0.38834	-0.583921	-0.415594	-0.246706	-0.327638	-0.295099	0.153632	-0.301012	-0.394962	-0.514174	-0.286519	-0.234918	-0.612816	0.513439	0.443146	0.12935	-0.15089	0.548872	-0.474766	0.286231	-0.265515	0.163316	0.0337802	0.92297
ICC15333	-0.601899	-0.637017	-0.683679	-0.476552	-0.590052	-0.0455857	-0.733191	-0.681122	-0.211597	-0.572679	-0.853277	-0.867519	-0.383141	-0.868292	-0.805433	-0.481923	-0.445355	-0.320003	-0.831937	0.827387	-0.527515	-0.458738	-0.438967	-0.699144	-0.676427	-0.624644	-0.897744	-0.5749	-0.857599	-0.85633	-1.02513	0.350185	-1.09244	-0.853938	-1.05171	-0.881284	-0.881189	-0.585868	0.494604	0.389453	-0.27708	-0.866876	0.272508	-0.717834	-0.196677	-0.676628	-0.2941	-0.335191	0.0951283
ICC15406	-0.711911	-0.761596	-0.684956	-0.609975	-0.609018	-0.185252	-0.77921	-0.798937	-0.120267	-0.603611	-0.835824	-0.981692	-0.496273	-0.876332	-0.819716	-0.556037	-0.514785	-0.464872	-0.910212	0.877616	-0.659897	-0.400185	-0.531289	-0.717069	-0.779154	-0.609272	-0.923473	-0.518947	-0.973853	-0.84616	-0.971781	0.350469	-1.03856	-1.07372	-1.09201	-1.04228	-1.06924	-0.77756	0.376268	0.186836	-0.38605	-0.8822	0.257184	-0.866345	-0.363917	-0.811091	-0.396307	-0.432716	0.13027
ICC15435	-0.546646	-0.616621	-0.466104	-0.432744	-0.950488	-0.307171	-0.529663	-0.617024	-0.12929	-0.461758	-0.687728	-0.737868	-0.243084	-0.793268	-0.659134	-0.343948	-0.735034	-0.508232	-0.712691	0.770784	-0.604408	-0.0684364	-0.466955	-0.347861	-0.582154	-0.537134	-0.771735	-0.291772	-0.745116	-0.713152	-0.796631	0.444458	-0.771848	-0.757584	-0.940789	-0.74695	-0.778591	-0.537378	0.19712	-0.0136435	-0.0340118	-0.676875	0.0468201	-0.646452	-0.166916	-0.581834	-0.0437481	-0.129062	-0.0499188
ICC15510	-0.335724	-0.540447	-0.679716	-0.430968	-0.982528	-0.27574	-0.622574	-0.576228	-0.0359479	-0.330436	-0.8618	-0.67314	-0.197086	-0.510031	-0.852976	-0.293267	-0.575099	-0.625075	-0.476797	0.614401	-0.416378	-0.386621	-0.4683	-0.576041	-0.440427	-0.509345	-0.666427	-0.472087	-0.638247	-0.554777	-0.733985	0.360911	-0.802328	-0.727193	-0.769927	-0.611467	-0.582237	-0.644336	0.140107	-0.0597313	-0.0634511	-0.532027	-0.0564964	-0.595772	0.104876	-0.478087	-0.084113	-0.114799	0.0902471
ICC15518	-0.511034	-0.717318	-0.632353	-0.526677	-0.665671	-0.248668	-0.697473	-0.59702	-0.0941986	-0.481814	-0.814958	-0.667399	-0.288633	-0.658287	-0.701561	-0.381693	-0.287896	-0.467938	-0.670836	0.916692	-0.667646	-0.333015	-0.636326	-0.590069	-0.560069	-0.653439	-0.622186	-0.486636	-0.674127	-0.621872	-0.677257	0.229824	-0.66392	-0.81822	-0.756382	-0.648907	-0.66338	-0.76814	0.439796	0.0906429	-0.142512	-0.529927	0.165154	-0.718535	-0.171885	-0.559229	-0.152249	-0.203745	0.315539
ICC15567	0.148769	0.386268	0.332323	0.311055	0.521157	0.515708	0.439409	0.168916	-0.0285342	0.226894	0.33233	0.198428	-0.0944643	0.428651	0.274561	0.0700052	0.27722	0.586224	0.301644	-0.337547	0.360503	0.149899	0.318986	0.377208	0.158524	0.452228	0.0828798	0.193978	0.181815	0.23407	0.119374	-0.370967	0.047909	0.516362	0.170836	0.286114	0.342918	0.435857	-0.0127201	0.125092	-0.322411	0.00813498	0.0341592	0.410544	-0.203509	0.307638	-0.319661	-0.221323	-0.0365666
ICC15606	0.321409	0.617177	0.678209	0.422304	0.351985	0.366826	0.683845	0.414392	0.00831707	0.294961	0.712034	0.501133	0.0407164	0.497238	0.567381	0.37167	0.213661	0.472199	0.481567	-0.558225	0.536264	0.349072	0.703372	0.676271	0.564761	0.485438	0.511488	0.65016	0.490243	0.458735	0.519888	-0.201449	0.465592	0.638016	0.627538	0.466038	0.503591	1.2172	-0.433179	-0.195997	-0.150292	0.326448	-0.358205	0.582143	-0.162496	0.450103	-0.129853	-0.0486831	-0.534024
ICC15610	0.244765	0.398502	0.35184	0.472084	0.354941	0.126299	0.438116	0.34087	0.0211582	0.371794	0.599492	0.350612	0.0291052	0.428398	0.434028	0.394396	0.156266	0.237916	0.480882	-0.315949	1.06781	0.204794	1.16468	0.384239	0.43453	0.483712	0.297495	0.672366	0.392268	0.337869	0.227856	-0.0153604	0.347847	0.632648	0.46349	0.449224	0.407698	0.588041	-0.383399	-0.130609	-0.194159	0.688905	-0.299061	0.654294	-0.110635	0.320392	-0.184126	-0.108679	-0.409327
ICC15612	0.180888	0.470413	0.483061	0.23548	0.32228	0.17688	0.41482	0.266588	-0.0338743	0.176811	0.519487	0.204013	0.0193355	0.777609	0.650052	0.0474965	-0.010102	0.378502	0.355094	-0.532262	0.383777	0.313123	0.393246	0.428577	0.287932	0.633142	0.171707	0.240664	0.243068	0.123116	0.466251	-0.156756	0.250153	0.411652	0.237812	0.283896	0.326132	0.580872	-0.0815321	-0.0852315	-0.060337	0.0771923	-0.0559835	0.354218	0.022667	0.28513	-0.0409387	0.00225231	-0.160006
ICC15614	0.140792	0.263834	0.298853	0.263539	0.125066	0.116494	0.278476	0.191115	-0.00113311	0.191343	0.350367	0.219066	0.0302257	0.805668	0.570417	0.116136	0.125651	0.245279	0.386274	-0.404834	0.456058	0.176259	0.3339	0.30524	0.310268	0.690856	-0.0296695	0.32283	0.186325	0.14077	0.311698	-0.102164	0.190808	0.4189	0.0686916	0.20374	0.215281	0.412272	-0.08677	0.0364744	-0.0317579	0.171845	-0.006594	0.368751	-0.0887043	0.19665	-0.0196433	0.0204262	-0.0268545
ICC15618	0.185455	0.471859	0.483987	0.237446	0.322165	0.174684	0.408982	0.263871	-0.0308679	0.178257	0.518852	0.20754	0.0213013	0.775933	0.643174	0.0479015	-0.00917672	0.379947	0.356539	-0.529776	0.386783	0.313528	0.390009	0.42534	0.288857	0.634587	0.175234	0.244711	0.240872	0.123522	0.458852	-0.162074	0.252639	0.407895	0.238217	0.285341	0.325496	0.576595	-0.0852891	-0.0869075	-0.062013	0.0801986	-0.0560987	0.355664	0.0241126	0.285014	-0.045216	0.000576322	-0.161682
ICC15697	-0.732483	-0.782688	-0.701886	-0.623784	-0.646239	-0.203743	-0.822154	-0.850205	-0.123671	-0.609616	-0.876687	-1.0007	-0.500198	-0.921357	-0.875146	-0.587535	-0.534318	-0.482323	-0.953156	0.8893	-0.685152	-0.429602	-0.564868	-0.768857	-0.811693	-0.644933	-0.968498	-0.543682	-1.02616	-0.889104	-1.02617	0.362152	-1.09191	-1.14892	-1.16408	-1.08835	-1.12155	-0.817382	0.406161	0.2006	-0.392576	-0.951157	0.27407	-0.904606	-0.374084	-0.851954	-0.414799	-0.449127	0.133109
ICC15762	-0.342157	-0.536475	-0.617474	-0.425434	-0.857335	-0.164073	-0.63473	-0.529074	-0.0699544	-0.326984	-0.742849	-0.59425	-0.204039	-0.372351	-0.676797	-0.310626	-0.575808	-0.444214	-0.469183	0.628259	-0.34269	-0.360277	-0.281716	-0.590797	-0.389631	-0.404442	-0.561523	-0.472276	-0.651443	-0.550804	-0.638446	0.348756	-0.788991	-0.691485	-0.695199	-0.550786	-0.567339	-0.541514	0.260618	-0.0770894	-0.0761269	-0.482271	-0.150333	-0.596481	0.0791934	-0.459026	-0.0884646	-0.114989	-0.0280418
ICC15785	0.0180627	-0.0357844	0.0627067	0.0055411	0.101706	0.0509934	0.0485723	0.0330072	-0.107735	-0.0271146	-0.0205277	-0.0144797	-0.0425589	0.258925	-0.0101429	0.0188988	-0.063152	0.179779	0.0835339	-0.0941856	0.0393804	-0.0474011	0.0837067	0.2028	0.0340607	0.120701	0.00628062	-0.0152879	0.0250955	0.00451359	0.0573424	0.0440813	0.0144915	0.088586	0.0625004	0.114307	0.135733	0.093404	-0.124697	0.041729	-0.0691647	-0.135578	-0.032555	0.0488417	0.145465	0.0583123	-0.0658945	-0.0497571	-0.0143162
ICC15802	-0.410917	-0.692118	-0.605593	-0.583679	-1.06188	-0.336365	-0.804421	-0.627489	-0.074202	-0.482107	-0.93231	-0.620348	-0.201523	-0.482732	-0.705497	-0.385108	-0.636244	-0.613384	-0.614941	0.618809	-0.64869	-0.396261	-0.639221	-0.701178	-0.45735	-0.515863	-0.713005	-0.638845	-0.749858	-0.686158	-0.601073	0.540126	-0.692308	-0.955343	-0.84616	-0.694984	-0.709976	-0.719529	0.500893	-0.0896612	0.0314817	-0.735203	-0.0822642	-0.857218	0.160269	-0.581373	0.0285088	-0.0391159	0.0155747
ICC15868	0.575501	0.605936	0.421405	0.243018	0.547808	-0.0439766	0.437445	0.406793	0.229112	0.331583	0.523383	0.779157	0.204803	0.218583	0.487985	0.370833	0.234155	0.203428	0.484373	-0.523684	0.273736	0.0350381	0.585997	0.2072	0.402123	0.0803584	1.30717	0.331964	0.49669	0.501081	0.771379	-0.154941	0.8716	0.464453	1.31553	0.595267	0.536572	0.505689	-0.350253	-0.472052	0.118367	0.686673	-0.449567	0.350831	-0.0951778	0.383714	0.153373	0.175234	-0.45474
ICC15888	0.522594	0.73356	0.602615	0.259826	0.689999	0.196024	0.397025	0.370534	0.169962	0.303649	0.422612	0.674744	0.111836	0.314991	0.762323	0.101498	-0.0721191	0.548001	0.297239	-0.571388	0.377428	0.162662	0.562225	0.482058	0.190537	0.378108	0.739727	0.251484	0.236719	0.242671	0.752289	-0.15322	0.748458	0.431316	0.705941	0.309803	0.25527	0.54903	-0.255405	-0.182106	-0.0146599	0.429303	-0.23714	0.360876	-0.0320664	0.227795	-0.00202499	0.0370039	-0.556031
ICC16207	0.192638	0.365625	0.330409	0.501638	0.426637	0.138165	0.370382	0.185732	0.0288618	0.316026	0.706566	0.339066	0.0425317	0.389279	0.37878	0.291284	0.353865	0.257585	0.415749	-0.292117	0.390325	0.115209	0.57148	0.291533	0.282513	0.32233	0.468561	0.548443	0.393208	0.404362	0.49465	-0.174661	0.210918	0.832848	0.50293	0.448603	0.513731	0.559846	-0.346561	-0.226438	-0.0886467	0.337628	-0.267945	0.656275	-0.163802	0.377521	-0.0848562	-0.0401044	-0.29601
ICC16261	0.202274	0.49284	0.475833	0.248542	0.0798939	0.287751	0.350363	0.202651	0.0483828	0.235136	0.272939	0.356506	0.0282357	0.235552	0.297891	0.152645	-0.0183705	0.472725	0.290637	-0.373007	0.430136	0.122243	0.514522	0.435916	0.176651	0.298149	0.178006	0.313036	0.148957	0.246994	0.261324	-0.030277	0.303796	0.247825	0.284691	0.0753267	0.11184	0.514335	-0.178245	-0.15385	-0.069646	0.268184	-0.242181	0.314214	-0.00277007	0.120783	-0.0752202	-0.0242253	-0.348285
ICC16269	0.14677	0.432653	0.473396	0.13685	0.42395	0.325894	0.301102	0.243395	0.0542692	0.0948291	0.279866	0.226084	-0.0564035	0.0426989	0.216894	0.110667	0.250768	0.608677	0.236173	-0.350472	0.21335	0.0396851	0.266521	0.402263	0.120106	0.192179	0.0605903	0.232559	0.0455882	0.0869174	0.117375	-0.155497	0.191063	0.0783833	0.105885	-0.0275215	-0.027947	0.389115	0.0726846	0.0752283	-0.190183	-0.0479715	-0.00633944	0.168184	-0.224758	0.0262587	-0.198879	-0.114587	-0.123369
ICC16374	0.236608	0.276928	0.182922	-0.0157543	0.618361	0.444346	-0.0309924	-0.0678882	0.306429	-0.0442479	0.00031805	0.231119	-0.168947	-0.181701	0.209443	-0.178765	-0.0823664	0.276062	-0.202054	-0.0187124	-0.0896091	0.190914	-0.0203103	0.0998236	-0.0881654	0.0936827	0.309108	-0.0355428	-0.345295	-0.207718	0.150505	-0.16711	0.316799	-0.146537	0.285208	-0.190531	-0.244023	0.045055	0.223393	-0.0804971	-0.331861	-0.193292	-0.00442562	-0.0947151	-0.388808	-0.11646	-0.3468	-0.255225	-0.180244
ICC16487	0.302597	0.244068	0.240588	0.369676	0.302999	-0.0838027	0.555259	0.522005	0.0893961	0.453038	0.646399	0.335088	0.23053	0.60433	0.337343	0.377311	0.460703	0.120941	0.514782	-0.406911	0.374901	0.380206	0.303209	0.329175	0.512133	0.236151	0.53898	0.284855	0.88712	0.663637	0.569231	-0.35969	0.586211	0.727419	0.572829	0.894651	0.892665	0.332156	-0.237122	-0.390136	0.0977909	0.51418	-0.240708	0.592987	0.0548916	0.640957	0.101061	0.145813	-0.139747
ICC16524	0.161354	0.397813	0.66695	0.278377	0.355292	0.0569355	0.476967	0.283472	0.114116	0.148433	0.521284	0.36449	-0.0246508	0.325738	0.525946	0.204851	0.115517	0.254915	0.409437	-0.324442	0.25915	0.292029	0.373191	0.592695	0.306897	0.450766	0.331663	0.483342	0.400423	0.438111	0.522675	-0.197621	0.522486	0.369226	0.466963	0.230545	0.27018	0.593074	-0.36848	-0.310269	-0.189126	0.0919956	-0.223272	0.362258	-0.0946761	0.257271	-0.186376	-0.103125	-0.273187
ICC16654	-0.73138	-0.783666	-0.702864	-0.6232	-0.648257	-0.20264	-0.825212	-0.853264	-0.124128	-0.610073	-0.879225	-1.00168	-0.499614	-0.921814	-0.877164	-0.585911	-0.536335	-0.483821	-0.953613	0.891444	-0.685089	-0.43266	-0.572088	-0.770875	-0.814231	-0.643829	-0.972077	-0.54518	-1.02818	-0.894244	-1.02923	0.368979	-1.09549	-1.1525	-1.17078	-1.08984	-1.12148	-0.819921	0.415069	0.199623	-0.394594	-0.952134	0.270492	-0.905063	-0.375062	-0.856053	-0.415256	-0.446982	0.134733
ICC16796	-0.402593	-0.876291	-0.746064	-0.554545	-0.627465	-0.196935	-0.905351	-0.538004	-0.0866883	-0.496154	-0.944796	-0.580808	-0.15574	-0.938481	-1.00933	-0.306029	-0.258534	-0.434935	-0.780384	1.02877	-0.747539	-0.385335	-0.684484	-0.56591	-0.565565	-0.914904	-0.666702	-0.522827	-0.63332	-0.568058	-0.781603	0.463648	-0.725084	-0.972511	-0.839397	-0.612782	-0.733388	-0.827223	0.370828	0.0794238	0.0434477	-0.621786	-0.0453256	-0.879069	-0.190388	-0.587616	0.0181036	-0.0656492	0.175295
ICC16903	0.490341	0.952073	0.575045	0.377929	0.510512	0.243891	0.436048	0.268567	0.203783	0.387415	0.540716	0.55977	-0.00105693	0.456506	0.617174	0.129596	-0.0622304	0.426264	0.458003	-0.578668	0.471079	0.206888	0.380137	0.453447	0.241006	0.496731	0.523822	0.359181	0.27054	0.334761	0.602458	-0.216168	0.509141	0.440164	0.614899	0.179741	0.197005	0.606263	-0.448419	-0.327255	-0.247213	0.418902	-0.420269	0.509154	-0.215195	0.225718	-0.254868	-0.126875	-0.467063
ICC16915	0.489574	0.960671	0.581041	0.377162	0.518069	0.257691	0.45349	0.276124	0.193651	0.377803	0.555036	0.552239	-0.0101485	0.472387	0.635656	0.135071	-0.0598762	0.43226	0.476486	-0.596084	0.477075	0.210283	0.397579	0.477652	0.252725	0.513653	0.532939	0.364657	0.287982	0.352723	0.626663	-0.213294	0.516698	0.46697	0.637023	0.19146	0.214447	0.627346	-0.445024	-0.331665	-0.239656	0.436344	-0.421556	0.51463	-0.213881	0.233795	-0.248352	-0.121399	-0.474593
ICC18679	-0.502111	-0.804123	-0.785232	-0.538045	-0.638019	-0.26784	-0.838906	-0.608388	-0.0275271	-0.426068	-0.885115	-0.751603	-0.253698	-0.532305	-0.697321	-0.685448	-0.141624	-0.570351	-0.557341	0.848616	-0.828849	-0.274148	-1.03009	-0.819947	-0.509525	-0.521214	-0.931143	-0.861146	-0.543463	-0.598382	-0.648565	-0.0515595	-0.764253	-0.818663	-0.980536	-0.624377	-0.596708	-1.00946	0.65162	0.114133	-0.0727192	-0.653151	0.285932	-0.70597	-0.0224917	-0.504523	-0.0876582	-0.170891	0.807264
ICC18699	-0.400023	-0.662495	-0.532268	-0.495266	-0.629057	-0.0429696	-0.629644	-0.515664	-0.0336532	-0.406701	-0.733082	-0.543901	-0.254621	-0.610748	-0.723737	-0.32583	-0.0988456	-0.308022	-0.524447	0.791504	-0.694504	-0.251139	-0.567456	-0.539929	-0.39287	-0.577806	-0.595978	-0.459907	-0.579244	-0.538435	-0.556362	0.0432452	-0.543545	-0.841437	-0.717167	-0.613334	-0.621564	-0.629035	0.554969	-0.034545	-0.106939	-0.437125	0.0129121	-0.729265	-0.126427	-0.515332	-0.121878	-0.168693	0.205959
ICC18720	-0.702353	-0.833198	-0.709215	-0.58741	-0.596859	-0.184018	-0.907522	-0.908519	-0.203836	-0.676254	-0.960493	-0.957047	-0.409717	-0.79966	-0.765416	-0.578215	-0.57026	-0.432422	-0.949038	0.993308	-0.709649	-0.355769	-0.572196	-0.637275	-0.812778	-0.546648	-0.925881	-0.55101	-1.07303	-0.968749	-0.919042	0.475525	-1.07115	-1.0033	-1.22136	-1.03845	-1.03003	-0.832515	0.427967	0.334783	-0.213651	-1.08647	0.388483	-0.885401	-0.271637	-0.817141	-0.222867	-0.313903	0.30319
ICC18828	-0.693794	-0.737756	-0.656954	-0.591338	-0.7064	-0.130717	-0.767857	-0.805794	-0.186954	-0.57561	-0.918638	-0.972941	-0.474515	-0.834284	-0.793276	-0.594109	-0.511757	-0.447276	-0.90146	0.792721	-0.624613	-0.370103	-0.58809	-0.682824	-0.763119	-0.571906	-1.01825	-0.559621	-0.948453	-0.901401	-0.996847	0.277539	-1.04178	-1.04052	-1.20344	-1.04133	-1.0506	-0.762045	0.497917	0.282991	-0.347644	-0.848996	0.297151	-0.828979	-0.392104	-0.809623	-0.362063	-0.411478	0.206656
ICC18836	-0.581672	-0.669337	-0.588534	-0.461527	-0.520921	0.0292687	-0.616196	-0.732691	-0.105007	-0.52852	-0.666566	-0.859778	-0.464885	-0.819971	-0.838793	-0.435163	-0.434492	-0.28833	-0.842405	0.798709	-0.615502	-0.328736	-0.378679	-0.679957	-0.697301	-0.558634	-0.784911	-0.345528	-0.926336	-0.765867	-1.01375	0.305899	-0.963474	-0.872731	-0.936796	-0.870421	-0.89686	-0.570323	0.39413	0.136543	-0.387438	-0.846129	0.153305	-0.712695	-0.41473	-0.678252	-0.396134	-0.416935	0.0341945
ICC18839	-0.459415	-0.592342	-0.641084	-0.252906	-0.246226	-0.164272	-0.51735	-0.447072	-0.12426	-0.372446	-0.660847	-0.652718	-0.397255	-0.674301	-0.583869	-0.414877	-0.168642	-0.437129	-0.631183	0.721187	-0.283579	-0.204397	-0.458283	-0.529085	-0.515733	-0.378627	-0.823414	-0.373105	-0.632913	-0.54424	-0.835304	0.27572	-0.762657	-0.44664	-0.829625	-0.52133	-0.568579	-0.601543	0.283831	0.272848	-0.40357	-0.566752	0.275042	-0.447885	-0.259175	-0.456104	-0.427874	-0.427344	0.0815346
ICC18847	-0.554597	-0.596998	-0.653545	-0.37254	-0.411644	-0.0300188	-0.544897	-0.61457	-0.0893769	-0.370339	-0.608275	-0.741657	-0.445613	-0.784571	-0.729516	-0.548038	-0.289837	-0.439184	-0.55832	0.763354	-0.545245	-0.322471	-0.651274	-0.504607	-0.591665	-0.437911	-0.815064	-0.41418	-0.673467	-0.436519	-0.924763	-0.0291269	-0.931716	-0.590727	-0.812951	-0.731489	-0.746482	-0.662387	-0.0215366	0.179227	-0.409787	-0.467356	0.213157	-0.52954	-0.331466	-0.562211	-0.428368	-0.439284	0.194457
ICC18858	-0.345695	-0.199762	-0.102311	-0.309312	-0.265173	-0.319528	-0.442129	-0.361446	-0.181707	-0.336245	-0.286476	-0.319448	-0.0156001	-0.291606	-0.0211632	-0.0477894	-0.464368	-0.241728	-0.355662	0.0441092	-0.182866	-0.272769	0.0222211	-0.260327	-0.393689	-0.113511	-0.18475	0.0049075	-0.544686	-0.475783	-0.179992	0.72813	-0.319091	-0.418243	-0.359006	-0.474723	-0.504804	-0.275036	0.119731	0.25286	0.224688	-0.254813	0.194184	-0.417407	0.0917837	-0.416781	0.237323	0.119753	0.182248
ICC18912	-0.512535	-0.58199	-0.473094	-0.499564	-0.339927	-0.181495	-0.68961	-0.672919	-0.0618829	-0.49268	-0.622401	-0.705318	-0.323431	-0.927723	-0.565193	-0.610549	-0.290438	-0.365907	-0.721242	0.958372	-0.79401	-0.263241	-0.58372	-0.702386	-0.692676	-0.583664	-0.54877	-0.649938	-0.791646	-0.678001	-0.657428	0.229363	-0.730454	-0.8166	-0.766207	-0.856432	-0.883911	-0.757675	0.239034	0.0875808	-0.120602	-0.536631	0.245333	-0.643558	-0.38045	-0.664782	-0.136061	-0.228658	0.247444
ICC19095	-0.511235	-0.569764	-0.515495	-0.446237	-0.430193	-0.0933104	-0.591541	-0.57537	-0.0522581	-0.483575	-0.649715	-0.685288	-0.372596	-0.613745	-0.565974	-0.380333	-0.380183	-0.31258	-0.682482	0.729197	-0.508646	-0.292115	-0.418017	-0.556973	-0.62114	-0.442934	-0.662967	-0.356251	-0.733637	-0.640282	-0.674337	0.331595	-0.747883	-0.71593	-0.768549	-0.696451	-0.713525	-0.610181	0.32982	0.0914827	-0.309197	-0.613369	0.131656	-0.643297	-0.222551	-0.564112	-0.322575	-0.328288	0.0807003
ICC19100	-0.51863	-0.756649	-0.766893	-0.477564	-0.411055	-0.095503	-0.623388	-0.547387	-0.190759	-0.528429	-0.803304	-0.747831	-0.246804	-0.801671	-0.666496	-0.616643	-0.327227	-0.400616	-0.740343	0.785274	-0.650789	-0.264653	-0.676698	-0.504018	-0.660791	-0.543976	-0.950783	-0.563946	-0.653108	-0.656001	-0.822202	-0.0134503	-0.795338	-0.690548	-0.898725	-0.665347	-0.734447	-0.734115	0.322425	0.450872	-0.064265	-0.573941	0.471275	-0.664219	-0.0504558	-0.588155	-0.0792039	-0.178044	0.304822
ICC19169	-0.48278	-0.922141	-0.990133	-0.535882	-0.429312	-0.250069	-0.915823	-0.585415	-0.163754	-0.475411	-0.79971	-0.673482	-0.237488	-0.631593	-0.876729	-0.426796	-0.202413	-0.607208	-0.664953	1.04744	-0.667486	-0.392686	-0.759988	-0.655462	-0.568233	-0.665245	-0.745848	-0.59469	-0.656798	-0.471357	-0.811325	0.081189	-0.788103	-0.801412	-0.676622	-0.602964	-0.695476	-0.977645	0.246418	0.305671	-0.00292244	-0.360682	0.261562	-0.756874	0.0108868	-0.638669	-0.0152601	-0.131789	0.449406
ICC20259	-0.398654	-0.699625	-0.818083	-0.466843	-0.47265	-0.149294	-0.680821	-0.560078	-0.0671413	-0.40273	-0.74732	-0.626814	-0.230881	-0.576081	-0.695835	-0.444641	-0.20517	-0.465333	-0.5673	0.694024	-0.620298	-0.455793	-0.826218	-0.715969	-0.477343	-0.559268	-0.745484	-0.605251	-0.575793	-0.598456	-0.752692	-0.12343	-0.815313	-0.707921	-0.770945	-0.470454	-0.470359	-0.837331	0.369044	0.226955	-0.100888	-0.465411	0.299385	-0.6561	0.0367438	-0.415113	-0.12311	-0.167843	0.42948
ICC20260	-0.685102	-0.728544	-0.646181	-0.587849	-0.690944	-0.121505	-0.750841	-0.788777	-0.186066	-0.57212	-0.902142	-0.965289	-0.472066	-0.817267	-0.772618	-0.582295	-0.502544	-0.441185	-0.890687	0.786325	-0.6154	-0.36089	-0.572115	-0.66893	-0.751826	-0.564775	-1.0054	-0.548848	-0.935079	-0.883344	-0.97827	0.276346	-1.02372	-1.01674	-1.18226	-1.0264	-1.03307	-0.74763	0.48944	0.281798	-0.342594	-0.83302	0.29856	-0.819766	-0.37977	-0.795728	-0.360134	-0.404347	0.205983
ICC20261	-0.407279	-0.440836	-0.417262	-0.387024	0.103499	-0.194858	-0.29821	-0.270073	-0.348383	-0.46078	-0.345979	-0.539191	-0.00590837	-0.503546	-0.392823	-0.324241	-0.0488727	-0.0993696	-0.441178	0.0475578	-0.281389	-0.504479	-0.298974	-0.31879	-0.552562	-0.416497	-0.406054	-0.320969	-0.474644	-0.418747	-0.559976	0.0536783	-0.522186	-0.373174	-0.411226	-0.38127	-0.393661	-0.442753	-0.00636545	1.04607	0.185475	-0.471435	1.14971	-0.505525	0.576474	-0.362347	0.190306	0.0748176	0.366227
ICC20262	-0.244052	-0.486234	-0.592206	-0.424619	-0.266022	0.115602	-0.544429	-0.338363	-0.0759021	-0.392242	-0.561503	-0.517996	-0.19698	-0.350725	-0.632279	-0.224487	-0.21185	-0.132282	-0.476171	0.403801	-0.330949	-0.341772	-0.290265	-0.430261	-0.321181	-0.45201	-0.455095	-0.356483	-0.492468	-0.485476	-0.606935	0.156034	-0.571226	-0.682865	-0.472232	-0.414182	-0.492646	-0.494915	0.543415	0.255133	-0.135141	-0.573542	0.0819991	-0.555605	0.0831307	-0.420232	-0.138635	-0.133423	0.239668
ICC20263	-0.448415	-0.440351	-0.359549	-0.36781	-0.265402	0.167209	-0.54641	-0.578623	-0.0768423	-0.402546	-0.579092	-0.695825	-0.241622	-0.492135	-0.459452	-0.334162	-0.266898	-0.0744324	-0.519772	0.451245	-0.363625	-0.115358	-0.2423	-0.48687	-0.474558	-0.181374	-0.662579	-0.382916	-0.728566	-0.785046	-0.554288	0.468812	-0.727204	-0.619813	-0.845159	-0.638834	-0.6403	-0.481288	0.446747	0.111641	-0.13296	-0.687378	0.133085	-0.553424	-0.286155	-0.45707	-0.135413	-0.174943	0.157047
ICC20265	-0.189644	-0.30072	-0.339578	-0.318704	-0.117967	-0.146308	-0.375043	-0.151288	-0.206187	-0.268639	-0.419171	-0.279415	0.277279	-0.318688	-0.379651	-0.19193	0.0964456	-0.0851572	-0.202212	0.017548	-0.287987	-0.456969	-0.353436	-0.440366	-0.272496	-0.365866	-0.277385	-0.39156	-0.287184	-0.33638	-0.342861	0.0736136	-0.290504	-0.418271	-0.264867	-0.169878	-0.236897	-0.380677	0.220114	0.714304	0.535777	-0.173159	0.714418	-0.452813	0.464783	-0.22015	0.538527	0.422518	0.453276
ICC20267	-0.164276	-0.553692	-0.492139	-0.24183	-0.326196	-0.0106446	-0.561421	-0.379287	0.0699476	-0.212055	-0.586819	-0.235838	-0.342477	-0.390608	-0.622738	-0.251364	-0.0503926	-0.271015	-0.320956	0.744229	-0.438987	-0.160545	-0.614211	-0.172035	-0.180014	-0.357146	-0.613078	-0.34434	-0.422056	-0.237655	-0.472531	-0.046171	-0.430579	-0.474064	-0.56206	-0.426491	-0.406627	-0.492137	0.291785	-0.043841	-0.419028	-0.475036	-0.213853	-0.393107	-0.28868	-0.316003	-0.451655	-0.394417	0.143596
[truncated: 231 more columns]

## Sheet: Genetic distance
Supplementary Table S3. Genetic distance among the accessions by TASSEL software
ICC67	0
ICC95	0.176149	0
ICC283	0.238788	0.16048	0
ICC440	0.24737	0.193785	0.203395	0
ICC456	0.264715	0.227978	0.272091	0.261724	0
ICC506	0.291212	0.263276	0.250649	0.261872	0.304652	0
ICC637	0.228437	0.190238	0.164398	0.156202	0.280286	0.217128	0
ICC672	0.216047	0.206298	0.180861	0.204451	0.25573	0.2715	0.145656	0
ICC708	0.244499	0.253058	0.294626	0.300589	0.347655	0.315297	0.293554	0.289678	0
ICC762	0.210253	0.16631	0.203507	0.139187	0.271797	0.258987	0.154084	0.175564	0.256543	0
ICC791	0.237688	0.179618	0.197242	0.136517	0.215822	0.283274	0.152788	0.171915	0.295463	0.125255	0
ICC867	0.126959	0.161483	0.199457	0.206017	0.23028	0.30229	0.197062	0.180785	0.248023	0.167256	0.199863	0
ICC1052	0.247688	0.270314	0.230607	0.25084	0.332688	0.308346	0.236842	0.181399	0.328999	0.232356	0.258886	0.246787	0
ICC1083	0.230976	0.221401	0.227877	0.216107	0.307024	0.279956	0.228149	0.206174	0.301138	0.177525	0.209123	0.220367	0.246634	0
ICC1098	0.209697	0.163055	0.19154	0.20944	0.199456	0.313666	0.22789	0.219584	0.2731	0.201812	0.198407	0.143639	0.266316	0.188564	0
ICC1161	0.272356	0.265595	0.24491	0.230947	0.331107	0.317216	0.185493	0.163148	0.329607	0.210516	0.200342	0.227619	0.221526	0.251302	0.292317	0
ICC1164	0.29685	0.309606	0.267678	0.255129	0.276419	0.306069	0.218302	0.186661	0.335579	0.219534	0.218791	0.245415	0.248736	0.259109	0.293155	0.210887	0
ICC1180	0.235397	0.180888	0.160086	0.216167	0.223311	0.178707	0.178772	0.212322	0.304954	0.211344	0.208887	0.233615	0.25784	0.223921	0.234225	0.272885	0.255723	0
ICC1194	0.206789	0.194803	0.181781	0.184151	0.29023	0.273893	0.174862	0.172368	0.269628	0.140863	0.16288	0.168458	0.1978	0.153228	0.205748	0.223872	0.174072	0.218908	0
ICC1205	0.606625	0.64943	0.581235	0.520307	0.578443	0.496436	0.576605	0.574189	0.549042	0.564041	0.578351	0.606794	0.501484	0.559265	0.600523	0.532416	0.484049	0.555506	0.557025	0
ICC1230	0.258333	0.202852	0.221514	0.177668	0.266279	0.282304	0.204723	0.195933	0.332354	0.168003	0.173884	0.245438	0.274833	0.180366	0.212696	0.214152	0.287013	0.228865	0.190639	0.589673	0
ICC1356	0.291751	0.242401	0.208174	0.215909	0.338569	0.225359	0.179642	0.209612	0.291399	0.189806	0.191591	0.28913	0.279742	0.258709	0.238271	0.254802	0.256817	0.264866	0.222621	0.489073	0.262378	0
ICC1392	0.311254	0.252214	0.235957	0.234753	0.273518	0.313647	0.248561	0.253149	0.383309	0.233185	0.205153	0.290579	0.307128	0.235513	0.248655	0.260498	0.330515	0.230567	0.24343	0.555878	0.113534	0.312604	0
ICC1397	0.25483	0.223455	0.179814	0.215184	0.286958	0.222208	0.149056	0.181695	0.30807	0.221157	0.218528	0.221734	0.273128	0.249197	0.232872	0.21309	0.262254	0.210926	0.195286	0.545612	0.238223	0.169375	0.270838	0
ICC1398	0.218975	0.220568	0.203728	0.197754	0.301104	0.255637	0.199466	0.166667	0.264434	0.157995	0.169466	0.175328	0.216551	0.16384	0.216227	0.199004	0.171305	0.24281	0.113752	0.522582	0.196773	0.182626	0.242504	0.169343	0
ICC1422	0.253275	0.194144	0.171807	0.187359	0.281833	0.209044	0.212169	0.222106	0.279651	0.187878	0.216921	0.245944	0.257387	0.137785	0.16733	0.285015	0.306732	0.207533	0.162534	0.539328	0.170182	0.189213	0.239069	0.173191	0.164616	0
ICC1431	0.199054	0.203628	0.222017	0.259944	0.218547	0.359405	0.226199	0.20614	0.304874	0.210481	0.213459	0.149403	0.260069	0.270977	0.219318	0.250653	0.27307	0.258291	0.216043	0.608815	0.27017	0.321347	0.233416	0.283975	0.229866	0.308902	0
ICC1510	0.276482	0.22851	0.211475	0.187297	0.285578	0.299354	0.168295	0.200481	0.328197	0.21222	0.167502	0.224731	0.284399	0.257331	0.238468	0.151952	0.238643	0.25197	0.22827	0.516247	0.189852	0.23425	0.195999	0.169715	0.207713	0.239686	0.259909	0
ICC1710	0.255162	0.243925	0.215068	0.16984	0.287063	0.312517	0.15228	0.135325	0.303656	0.122348	0.156056	0.185867	0.210831	0.209311	0.23525	0.177825	0.155441	0.258621	0.15198	0.529469	0.222702	0.197739	0.275683	0.213513	0.15043	0.25	0.219329	0.214437	0
ICC1715	0.271039	0.259808	0.22637	0.195733	0.307782	0.302389	0.163041	0.145148	0.317325	0.142981	0.174001	0.19947	0.24722	0.229093	0.278451	0.192472	0.196078	0.272618	0.169331	0.504332	0.250137	0.223878	0.268215	0.211431	0.180227	0.253779	0.215375	0.2187	0.0757838	0
ICC1882	0.212081	0.203793	0.216234	0.242778	0.22868	0.350107	0.263634	0.238447	0.28475	0.203361	0.230523	0.131217	0.24591	0.202927	0.136908	0.296374	0.257796	0.26487	0.188022	0.568631	0.285983	0.291261	0.295422	0.265632	0.201263	0.237273	0.174744	0.281835	0.187288	0.235641	0
ICC1915	0.468491	0.455504	0.393805	0.451413	0.514897	0.470243	0.414873	0.402318	0.51394	0.50295	0.476986	0.496128	0.35809	0.466916	0.450382	0.380603	0.494833	0.431283	0.468306	0.48976	0.416128	0.450462	0.395893	0.434793	0.488838	0.432612	0.464384	0.408839	0.496957	0.493205	0.48838	0
ICC1923	0.179555	0.20685	0.195278	0.25561	0.234216	0.343065	0.236355	0.170531	0.268226	0.209677	0.22897	0.111523	0.240734	0.231214	0.162315	0.250143	0.255774	0.276862	0.196221	0.621918	0.252096	0.275042	0.289461	0.238002	0.19044	0.261126	0.146757	0.256414	0.204092	0.218484	0.124418	0.487059	0
ICC2065	0.261583	0.214549	0.223888	0.102204	0.250124	0.271847	0.12819	0.193557	0.327289	0.112217	0.131978	0.214537	0.255923	0.206255	0.212245	0.226029	0.230988	0.217798	0.188124	0.531725	0.192936	0.217255	0.236111	0.228853	0.217133	0.204198	0.237054	0.20561	0.130254	0.153337	0.224619	0.460178	0.258753	0
ICC2072	0.165564	0.182801	0.23892	0.23296	0.196819	0.335645	0.22666	0.18797	0.268139	0.192191	0.176684	0.113095	0.240803	0.235918	0.200722	0.220949	0.259902	0.268732	0.185707	0.616058	0.234239	0.303943	0.241	0.259513	0.189668	0.285678	0.0805861	0.227015	0.201969	0.208092	0.176326	0.490495	0.116603	0.235476	0
ICC2210	0.227624	0.239029	0.240484	0.155794	0.270812	0.295777	0.14411	0.153564	0.311296	0.139271	0.160151	0.186021	0.184602	0.19216	0.238047	0.18557	0.193713	0.229949	0.166131	0.53328	0.207418	0.2336	0.255655	0.242755	0.164387	0.234558	0.201147	0.215668	0.101073	0.149276	0.205714	0.455364	0.215671	0.100902	0.184982	0
ICC2242	0.224107	0.230317	0.22143	0.142791	0.267415	0.284537	0.12979	0.158408	0.304156	0.123318	0.149561	0.180228	0.191566	0.183931	0.22204	0.179396	0.178066	0.215504	0.159363	0.520481	0.217202	0.218202	0.265939	0.225684	0.161712	0.234967	0.205972	0.209639	0.0869995	0.139488	0.18839	0.474821	0.218009	0.0716859	0.193152	0.0405201	0
ICC2263	0.210291	0.14517	0.124934	0.158269	0.248326	0.210052	0.133111	0.171064	0.29978	0.168288	0.139558	0.176356	0.230583	0.183401	0.180322	0.203482	0.247106	0.147894	0.164803	0.580703	0.16558	0.20536	0.176032	0.160497	0.156049	0.167767	0.206853	0.148479	0.186787	0.201882	0.20866	0.412337	0.214768	0.167832	0.18988	0.181056	0.172778	0
ICC2277	0.448421	0.460205	0.415638	0.451639	0.469851	0.358199	0.429517	0.399477	0.400882	0.423913	0.48099	0.461538	0.352465	0.382545	0.409503	0.419144	0.356866	0.371198	0.410936	0.387391	0.455728	0.366931	0.439257	0.431517	0.375566	0.374556	0.475007	0.47432	0.40388	0.427794	0.411512	0.437075	0.444875	0.451569	0.484066	0.404993	0.399119	0.448688	0
ICC2482	0.426005	0.423689	0.406857	0.409325	0.362182	0.347165	0.368599	0.339158	0.48088	0.43972	0.420123	0.452763	0.268597	0.411317	0.400356	0.388743	0.355134	0.323405	0.408435	0.478757	0.374653	0.441253	0.404164	0.380789	0.403179	0.381536	0.481169	0.388161	0.431686	0.450818	0.47729	0.349963		0.407825	0.432249	0.390168	0.401943	0.372994	0.360946	0
ICC2507	0.358463	0.38323	0.321122	0.382308	0.436595	0.393674	0.356743	0.290595	0.421704	0.378545	0.387765	0.371193	0.0394825	0.343664	0.363761	0.3184	0.334695	0.358441	0.310814	0.466589	0.407951	0.373776	0.390881	0.375749	0.332912	0.355807	0.359796	0.393421	0.328947	0.352708	0.330918	0.32794	0.338773	0.372965	0.351603	0.302898	0.31707	0.34953	0.351715	0.277569	0
ICC2580	0.279412	0.263845	0.316701	0.257108	0.306363	0.407757	0.281213	0.235603	0.34393	0.169477	0.239928	0.188769	0.297361	0.261447	0.230094	0.267191	0.245532	0.341354	0.214872	0.54409	0.241757	0.304871	0.264204	0.323803	0.229569	0.306213	0.225361	0.282883	0.183298	0.210374	0.209234	0.525229	0.209914	0.228248	0.206502	0.232112	0.223614	0.276919	0.459456	0.468674	0.378219	0
ICC2593	0.447241	0.441918	0.392628	0.426232	0.36814	0.377531	0.364327	0.362692	0.484005	0.462496	0.437008	0.469529	0.271488	0.416731	0.385656	0.440535	0.354167	0.348657	0.424434	0.461673	0.410724	0.438289	0.440374	0.407172	0.440579	0.390176	0.465871	0.435714	0.431642	0.453657	0.456769	0.372453	0.426663	0.399808	0.447375	0.39864	0.401216	0.408399	0.337719	0.09263	0.263776	0.474578	0
ICC2629	0.23742	0.175972	0.192362	0.095567	0.244969	0.262169	0.136881	0.18033	0.300652	0.0955644	0.0985934	0.196171	0.264662	0.18815	0.19127	0.219844	0.222046	0.213301	0.152991	0.545629	0.151713	0.198812	0.198792	0.207987	0.172833	0.18906	0.2304	0.176175	0.131593	0.154593	0.220723	0.476158	0.224022	0.0668781	0.212659	0.143914	0.127587	0.144045	0.474483	0.428611	0.403587	0.20819	0.441054	0
ICC2679	0.331696	0.36236	0.341946	0.354769	0.394574	0.386116	0.334775	0.261309	0.401034	0.346819	0.356159	0.339623	0.178729	0.309608	0.349381	0.341463	0.34324	0.333383	0.286853	0.467849	0.329805	0.392068	0.374725	0.349549	0.300103	0.343841	0.35575	0.394077	0.311558	0.328532	0.337061	0.37632	0.318918	0.342953	0.320501	0.283671	0.276329	0.33839	0.37529	0.196388	0.214952	0.354443	0.199373	0.360906	0
ICC2720	0.225203	0.207351	0.197101	0.14687	0.271179	0.236751	0.121411	0.161955	0.285656	0.136482	0.148825	0.185357	0.186894	0.189101	0.217152	0.18948	0.192666	0.192334	0.159762	0.532776	0.207204	0.186667	0.263231	0.208449	0.161816	0.20638	0.221239	0.203826	0.107591	0.148378	0.208588	0.45987	0.224114	0.0923854	0.207798	0.0734878	0.0519843	0.154792	0.392973	0.387888	0.312482	0.244521	0.390261	0.130699	0.291146	0
ICC2737	0.361119	0.38799	0.325441	0.384287	0.438686	0.397486	0.358835	0.294844	0.424286	0.379369	0.389091	0.372621	0.0392321	0.345495	0.362936	0.323992	0.335763	0.361352	0.314127	0.46976	0.409525	0.379121	0.39011	0.378444	0.335867	0.358094	0.362039	0.394737	0.331505	0.356884	0.330167	0.328271	0.3404	0.373281	0.351559	0.305521	0.318974	0.352899	0.34947	0.27657	0.0025974	0.376893	0.263373	0.406292	0.219074	0.315558	0
ICC2884	0.315084	0.335111	0.28146	0.34106	0.402446	0.361599	0.314529	0.24783	0.387742	0.332624	0.343785	0.326357	0.0442765	0.29955	0.327273	0.280785	0.301433	0.318182	0.266222	0.479193	0.36	0.340709	0.359554	0.337203	0.286164	0.314599	0.321217	0.352273	0.291414	0.316872	0.29902	0.324416	0.301001	0.339386	0.310731	0.265369	0.279326	0.30284	0.345614	0.275664	0.0104762	0.353075	0.266537	0.359836	0.201268	0.272498	0.0106355	0
ICC2919	0.439028	0.475835	0.428835	0.437105	0.46092	0.394946	0.403882	0.392596	0.428206	0.418964	0.450527	0.455598	0.297628	0.374216	0.428046	0.429239	0.295733	0.396307	0.357491	0.400082	0.470217	0.417249	0.516065	0.43646	0.396219	0.389859	0.489053	0.438468	0.368217	0.390837	0.411984	0.412483	0.446055	0.41697	0.475613	0.383511	0.370355	0.458549	0.281888	0.26722	0.287682	0.445312	0.246295	0.43631	0.314094	0.370302	0.28922	0.290289	0
ICC2969	0.258729	0.212575	0.206161	0.207515	0.280387	0.262036	0.207765	0.222646	0.329697	0.20713	0.21151	0.261221	0.269626	0.112736	0.188715	0.278679	0.283137	0.197858	0.198859	0.54572	0.18401	0.248934	0.244717	0.231005	0.240123	0.12454	0.315455	0.236174	0.264604	0.268434	0.259857	0.410291	0.285964	0.202332	0.286937	0.238235	0.229634	0.189664	0.38357	0.337283	0.349568	0.310179	0.339763	0.190613	0.329161	0.217366	0.350824	0.312535	0.350726
ICC2990	0.421374	0.37803	0.326185	0.349764	0.376436	0.34423	0.320261	0.336935	0.436142	0.371759	0.371655	0.434062	0.281034	0.347404	0.343478	0.394275	0.318944	0.323795	0.339247	0.463285	0.364528	0.354776	0.421186	0.363331	0.378247	0.301802	0.463848	0.365567	0.361016	0.384638	0.405294	0.355537	0.423561	0.347826	0.449241	0.367407	0.352247	0.353001	0.363596	0.203842	0.287243	0.414601	0.196165	0.355818	0.296186	0.32876	0.28835	0.284911	0.154385
ICC3218	0.376453	0.315518	0.312516	0.304961	0.325372	0.291155	0.292029	0.315685	0.418075	0.330576	0.339353	0.380438	0.331907	0.324943	0.3536	0.335541	0.295418	0.249926	0.316644	0.489465	0.269419	0.373117	0.295007	0.337386	0.355971	0.300106	0.397667	0.318339	0.367197	0.341574	0.398563	0.376976	0.418288	0.31972	0.386738	0.357324	0.3481	0.263343	0.3234	0.281966	0.383304	0.398137	0.305387	0.329372	0.348602	0.328023	0.386987	0.360667	0.348611
ICC3230	0.208137	0.209625	0.289494	0.21093	0.240798	0.360208	0.203571	0.193746	0.302727	0.135929	0.183478	0.188376	0.253998	0.207583	0.233994	0.255718	0.239136	0.282789	0.186184	0.606781	0.208412	0.277607	0.270432	0.2887	0.215736	0.278345	0.15738	0.284202	0.169698	0.19808	0.206437	0.536205	0.179462	0.16192	0.150959	0.144433	0.147826	0.247379	0.492506	0.47547	0.373863	0.168702	0.467474	0.165404	0.341542	0.177288	0.375361	0.335599	0.452759
ICC3239	0.417907	0.371751	0.331152	0.343911	0.390597	0.333397	0.319415	0.345477	0.422998	0.366857	0.382206	0.432266	0.281178	0.350321	0.348311	0.397016	0.337984	0.311098	0.350777	0.459907	0.36025	0.347085	0.432025	0.366608	0.384377	0.298639	0.483183	0.370023	0.374779	0.398814	0.417047	0.366408	0.439844	0.351001	0.468663	0.367764	0.353562	0.352962	0.372731	0.220309	0.300631	0.432586	0.220221	0.355347	0.312632	0.321746	0.304815	0.29616	0.171549
ICC3325	0.210518	0.186807	0.179009	0.252603	0.248686	0.2961	0.225515	0.231343	0.277447	0.238632	0.239153	0.157554	0.289832	0.288551	0.148732	0.310415	0.329095	0.244988	0.251087	0.627427	0.260399	0.255887	0.236678	0.211854	0.229656	0.221521	0.165122	0.260326	0.279924	0.29282	0.17978	0.430806	0.139101	0.272671	0.176853	0.282379	0.290013	0.193795	0.442593	0.455431	0.374056	0.271007	0.438001	0.234075	0.410263	0.268385	0.375308	0.340335	0.512358
ICC3362	0.201087	0.148153	0.175646	0.219736	0.293925	0.258882	0.19152	0.168047	0.278623	0.181673	0.198648	0.196532	0.228108	0.161299	0.233059	0.211695	0.25461	0.193367	0.174817	0.588531	0.210414	0.253423	0.254418	0.199715	0.168422	0.208987	0.213405	0.219516	0.1757	0.191399	0.20013	0.453601	0.21823	0.234676	0.201309	0.199679	0.182881	0.139873	0.412486	0.418384	0.345509	0.295997	0.439574	0.198251	0.292438	0.183046	0.349331	0.288484	0.419805
ICC3391	0.410345	0.39923	0.374056	0.394847	0.354844	0.343508	0.35957	0.348523	0.423903	0.425707	0.391677	0.441366	0.269538	0.396453	0.378826	0.388424	0.357354	0.314439	0.378965	0.44768	0.371683	0.40769	0.397136	0.372652	0.401022	0.353149	0.466762	0.381007	0.433997	0.432471	0.452736	0.331889	0.431628	0.410828	0.417654	0.394437	0.402023	0.372397	0.34926	0.0923416	0.289871	0.482989	0.121335	0.4143	0.170121	0.38035	0.292022	0.278391	0.279035
ICC3410	0.441187	0.486465	0.428914	0.497114	0.474062	0.315347	0.439616	0.407164	0.441719	0.471451	0.488442	0.495579	0.332835	0.455963	0.495803	0.41189	0.387228	0.381961	0.447687	0.396588	0.448458	0.399318	0.422067	0.436839	0.38845	0.430201	0.440217	0.459509	0.4651	0.46318	0.475836	0.422604	0.429621	0.508345	0.466922	0.451748	0.451659	0.436259	0.252967	0.333525	0.320028	0.501913	0.316516	0.507613	0.36496	0.433366	0.322523	0.318733	0.345281
ICC3421	0.460952	0.497817	0.445323	0.451935	0.467036	0.411178	0.421092	0.405233	0.448991	0.437565	0.466299	0.475972	0.311797	0.385599	0.441698	0.444268	0.307263	0.409185	0.37643	0.401235	0.487565	0.435214	0.527532	0.449939	0.417095	0.404542	0.50495	0.45691	0.382586	0.405351	0.423873	0.416708	0.462497	0.425828	0.491213	0.395611	0.381	0.478393	0.287316	0.268178	0.294349	0.453846	0.247747	0.451029	0.322167	0.386774	0.29438	0.301279	0.00850611
ICC3512	0.23927	0.177731	0.168756	0.155623	0.273936	0.226647	0.193915	0.19986	0.271811	0.159961	0.190549	0.220259	0.247784	0.149008	0.1594	0.254741	0.281615	0.206921	0.156369	0.544857	0.160484	0.190203	0.236722	0.168631	0.158544	0.0626151	0.291292	0.21175	0.22036	0.235686	0.223424	0.446385	0.245577	0.177376	0.264979	0.208101	0.205574	0.156394	0.401854	0.391139	0.359332	0.282765	0.405722	0.152091	0.343721	0.177732	0.361228	0.313699	0.408868
ICC3582	0.266899	0.275441	0.267692	0.246651	0.364008	0.363977	0.23882	0.213469	0.314159	0.228395	0.270172	0.272666	0.196385	0.214469	0.276751	0.215517	0.307976	0.31041	0.231014	0.5446	0.206151	0.295832	0.291745	0.29168	0.248788	0.235821	0.308654	0.243342	0.233175	0.268253	0.301296	0.343156	0.269036	0.261646	0.273476	0.205515	0.211889	0.246878	0.362804	0.334916	0.276291	0.3	0.358594	0.258895	0.264399	0.217676	0.277778	0.241896	0.31746
ICC3631	0.261532	0.257464	0.209905	0.241372	0.355948	0.258361	0.22042	0.191039	0.313094	0.230526	0.262565	0.257126	0.0750425	0.233457	0.261994	0.237427	0.25	0.234483	0.196928	0.497286	0.2776	0.241585	0.312592	0.259949	0.214742	0.226451	0.28714	0.279175	0.217869	0.24359	0.26106	0.351797	0.257515	0.250538	0.270766	0.20026	0.202179	0.216716	0.335212	0.270045	0.0545092	0.316073	0.271322	0.258854	0.202708	0.18668	0.0541607	0.0595284	0.290693
ICC3761	0.317905	0.326257	0.266586	0.329032	0.391736	0.344768	0.300537	0.251738	0.377077	0.324527	0.334628	0.319132	0.0468465	0.301957	0.307227	0.289789	0.302141	0.301636	0.267938	0.473947	0.355691	0.32295	0.346477	0.327798	0.286596	0.297371	0.323359	0.340944	0.288234	0.317622	0.287339	0.326993	0.299801	0.325351	0.316644	0.26372	0.272337	0.28961	0.333333	0.274862	0.014214	0.349093	0.257745	0.347423	0.208357	0.263835	0.0140941	0.0218855	0.287573
ICC3776	0.282351	0.297967	0.247711	0.294396	0.37273	0.331901	0.262226	0.208389	0.362745	0.276872	0.298906	0.286975	0.0467999	0.26626	0.296937	0.245523	0.27088	0.278715	0.232659	0.488233	0.322464	0.300406	0.329869	0.296755	0.252557	0.280488	0.289877	0.311391	0.24679	0.274787	0.269997	0.328652	0.272837	0.288899	0.277033	0.216386	0.225689	0.259107	0.34241	0.270687	0.0185458	0.328663	0.26571	0.311962	0.190996	0.218247	0.0178416	0.0246737	0.286677
ICC3892	0.369306	0.392204	0.366513	0.387459	0.510095	0.317465	0.389821	0.377352	0.352904	0.36818	0.424874	0.416802	0.260836	0.323862	0.406465	0.362802	0.399968	0.381579	0.34339	0.406673	0.37492	0.340404	0.389791	0.403774	0.325083	0.308905	0.417489	0.39561	0.386277	0.396398	0.395583	0.360023	0.420866	0.401941	0.430694	0.374813	0.365053	0.37608	0.263995	0.383066	0.267401	0.426613	0.377274	0.403889	0.297521	0.34739	0.269837	0.256708	0.301997
ICC3946	0.216076	0.17239	0.205333	0.218459	0.246068	0.287231	0.233239	0.206669	0.287867	0.163175	0.186287	0.173055	0.229137	0.218758	0.204918	0.240872	0.262214	0.201009	0.186205	0.590357	0.201072	0.27576	0.214791	0.251134	0.168077	0.229542	0.168061	0.252832	0.199694	0.236931	0.175419	0.453795	0.199537	0.221506	0.175471	0.20306	0.196742	0.182787	0.398825	0.427366	0.330203	0.2028	0.465189	0.1826	0.338521	0.202305	0.331756	0.287335	0.438949
ICC4093	0.346289	0.29598	0.262965	0.283333	0.384697	0.35078	0.275817	0.286411	0.386158	0.301619	0.303965	0.334522	0.271417	0.295737	0.295611	0.335502	0.330416	0.28985	0.241005	0.513013	0.289616	0.32351	0.30369	0.300719	0.306239	0.241537	0.36725	0.332709	0.314377	0.327694	0.357931	0.324336	0.392492	0.295075	0.380398	0.317285	0.308112	0.266263	0.374475	0.320936	0.316773	0.35139	0.328226	0.29449	0.277145	0.290279	0.320188	0.290045	0.340143
ICC4182	0.325745	0.347433	0.288911	0.344828	0.405918	0.370182	0.323386	0.264992	0.400156	0.346464	0.346539	0.334317	0.0397708	0.313543	0.330069	0.293816	0.31025	0.327811	0.278336	0.471115	0.366549	0.344864	0.361634	0.348862	0.301774	0.323613	0.330153	0.353729	0.297443	0.325581	0.302235	0.330606	0.307278	0.338688	0.322568	0.268072	0.282111	0.311081	0.354249	0.27883	0.00692779	0.35639	0.266685	0.360677	0.209582	0.278086	0.00620872	0.0146667	0.289641
ICC4363	0.261697	0.266512	0.263889	0.262413	0.352727	0.328795	0.270592	0.221147	0.351707	0.232834	0.283852	0.266463	0.0944579	0.242193	0.280208	0.26209	0.287522	0.275563	0.205695	0.508884	0.239834	0.328957	0.279752	0.317085	0.25	0.253008	0.279557	0.31641	0.241946	0.260684	0.291906	0.364398	0.294316	0.264269	0.275628	0.224966	0.231645	0.250511	0.363313	0.294464	0.103196	0.273373	0.301234	0.265421	0.189031	0.225173	0.104828	0.0982564	0.310108
ICC4418	0.331582	0.351274	0.291327	0.347501	0.414364	0.374078	0.323752	0.264047	0.398406	0.342617	0.354266	0.334994	0.0398641	0.313894	0.334332	0.293579	0.311458	0.332293	0.281315	0.468895	0.375302	0.33983	0.375763	0.348355	0.300485	0.324875	0.339881	0.360296	0.298806	0.326972	0.308717	0.326304	0.313424	0.347287	0.331332	0.275467	0.289651	0.31445	0.35466	0.279513	0.00633086	0.360481	0.268784	0.36948	0.20948	0.281744	0.00600109	0.0142684	0.288715
ICC4463	0.305701	0.316454	0.261905	0.314418	0.3841	0.33916	0.287562	0.239831	0.36674	0.308537	0.323503	0.306072	0.0492593	0.292419	0.297876	0.273	0.295319	0.299405	0.25405	0.473428	0.342215	0.311546	0.331894	0.313967	0.272686	0.288414	0.309446	0.330041	0.275022	0.303867	0.277027	0.327492	0.283661	0.311795	0.299859	0.244411	0.258093	0.281618	0.321483	0.281797	0.0169758	0.338227	0.264361	0.334089	0.210067	0.249751	0.0167558	0.0242795	0.296693
ICC4495	0.185249	0.190407	0.205619	0.243725	0.21719	0.327334	0.20178	0.189721	0.295288	0.201969	0.207811	0.146054	0.24304	0.254714	0.208167	0.237095	0.270661	0.227621	0.205259	0.614046	0.251085	0.296252	0.224968	0.254917	0.21594	0.281479	0.0304764	0.242334	0.212484	0.213204	0.175728	0.439581	0.144259	0.226401	0.0912577	0.193261	0.19798	0.186438	0.460563	0.452582	0.347935	0.230759	0.449784	0.220087	0.343391	0.209754	0.349103	0.305703	0.481874
ICC4533	0.372415	0.381288	0.416003	0.444021	0.487664	0.361922	0.426729	0.474003	0.371661	0.452673	0.464417	0.403186	0.445399	0.512617	0.432818	0.478598	0.510086	0.43577	0.442108	0.47271	0.474653	0.429881	0.497736	0.432915	0.417918	0.431865	0.451561	0.448191	0.501451	0.51437	0.446984	0.442935	0.437226	0.484849	0.437515	0.493049	0.494857	0.390606	0.540418	0.475056	0.462404	0.511791	0.511989	0.444281	0.496582	0.452328	0.470925	0.455878	0.502636
ICC4567	0.316701	0.231079	0.186967	0.214308	0.265629	0.285598	0.229452	0.236857	0.36104	0.181463	0.177281	0.257472	0.294688	0.239022	0.221793	0.278504	0.290119	0.20044	0.205667	0.539759	0.152663	0.259955	0.101157	0.243373	0.230129	0.207782	0.249063	0.230113	0.21956	0.211572	0.252493	0.441914	0.28115	0.204928	0.250771	0.252381	0.237658	0.177076	0.418756	0.404612	0.378589	0.213778	0.420659	0.175236	0.357443	0.229202	0.38031	0.348828	0.46121
ICC4593	0.182409	0.22468	0.187804	0.207117	0.232075	0.268717	0.164858	0.117792	0.298056	0.195564	0.190754	0.148008	0.187542	0.187994	0.220118	0.184962	0.208965	0.212478	0.163176	0.563724	0.198402	0.257273	0.237464	0.193844	0.157343	0.236022	0.171756	0.214545	0.159865	0.179745	0.199185	0.437065	0.143152	0.18324	0.143541	0.121939	0.127725	0.160942	0.413087	0.366169	0.293418	0.261398	0.377767	0.181248	0.247677	0.140409	0.295342	0.248707	0.412487
ICC4639	0.236668	0.185664	0.199239	0.113221	0.254251	0.265965	0.130941	0.193299	0.305649	0.125335	0.121502	0.18746	0.242922	0.223444	0.198598	0.22279	0.252251	0.213233	0.189806	0.542584	0.184193	0.205932	0.245257	0.222205	0.203319	0.206836	0.234115	0.185269	0.150828	0.191048	0.231487	0.436036	0.248856	0.0828821	0.228959	0.131514	0.115444	0.148011	0.450761	0.408758	0.376987	0.255951	0.411301	0.0900771	0.345334	0.12699	0.379054	0.336972	0.429231
ICC4657	0.18646	0.158272	0.186207	0.202765	0.156224	0.298799	0.17948	0.178516	0.271268	0.188274	0.166346	0.126324	0.275381	0.272524	0.162124	0.237853	0.294593	0.233257	0.21213	0.641009	0.201801	0.257854	0.232867	0.187346	0.220819	0.243082	0.148732	0.192934	0.207253	0.210262	0.185231	0.493634	0.130596	0.215328	0.121958	0.227184	0.229869	0.173605	0.516929	0.42943	0.40978	0.242695	0.436488	0.180605	0.367194	0.219638	0.412606	0.365289	0.516071
ICC4814	0.279175	0.2782	0.22838	0.281302	0.372679	0.308991	0.256761	0.214259	0.345783	0.265604	0.28793	0.279599	0.0534336	0.255224	0.280314	0.247483	0.274118	0.262076	0.218728	0.485515	0.304982	0.281736	0.323659	0.291793	0.241493	0.26228	0.2961	0.306266	0.245168	0.278869	0.268371	0.331977	0.276137	0.291445	0.286095	0.225233	0.23489	0.242774	0.349335	0.277836	0.0239531	0.325826	0.274966	0.297778	0.197765	0.218964	0.0238175	0.0308866	0.294471
ICC4841	0.409524	0.402397	0.397407	0.372138	0.430706	0.375235	0.363937	0.392615	0.390414	0.379828	0.400777	0.402458	0.441781	0.440956	0.380841	0.395699	0.404542	0.389871	0.408868	0.449664	0.383725	0.349104	0.432142	0.366747	0.383117	0.383519	0.457764	0.396622	0.413013	0.448595	0.444639	0.448852	0.442362	0.38942	0.446998	0.393632	0.378868	0.3746	0.429676	0.436808	0.501228	0.449521	0.445826	0.390309	0.449615	0.362186	0.505491	0.480532	0.490848
ICC4853	0.262326	0.28113	0.248085	0.305097	0.359874	0.345104	0.259047	0.21554	0.339839	0.292342	0.302431	0.295329	0.232863	0.229571	0.299094	0.253327	0.323815	0.274428	0.246675	0.545997	0.275231	0.331128	0.308098	0.269853	0.253367	0.261475	0.289613	0.295483	0.279424	0.29325	0.306198	0.308076	0.277488	0.324502	0.267133	0.262714	0.271704	0.236819	0.344477	0.319187	0.290106	0.377557	0.34426	0.307214	0.255706	0.268397	0.294645	0.254805	0.352312
ICC4872	0.400379	0.407465	0.388347	0.422763	0.466321	0.34267	0.412953	0.436232	0.376753	0.449004	0.479007	0.474611	0.460024	0.40865	0.44302	0.474321	0.441707	0.371791	0.424297	0.384729	0.445954	0.381731	0.48888	0.413288	0.427244	0.345904	0.527698	0.44488	0.495797	0.48608	0.471737	0.434711	0.481278	0.451535	0.509174	0.47326	0.458546	0.400539	0.355271	0.420051	0.48655	0.561775	0.419021	0.448479	0.454175	0.428409	0.494189	0.464421	0.402037
ICC4918	0.419939	0.386687	0.322061	0.405479	0.376471	0.196336	0.370655	0.416161	0.389792	0.428929	0.406706	0.438924	0.42837	0.389061	0.406153	0.457016	0.431843	0.268238	0.41889	0.44967	0.41197	0.338985	0.379263	0.358755	0.394702	0.303869	0.449819	0.408522	0.467477	0.416282	0.432422	0.459875	0.42859	0.399634	0.439438	0.446911	0.432616	0.336968	0.357739	0.368766	0.449875	0.521175	0.365649	0.411625	0.427192	0.394698	0.451878	0.433343	0.378002
ICC4991	0.216297	0.218786	0.253711	0.281209	0.31034	0.282129	0.241281	0.239461	0.249807	0.223728	0.244073	0.15969	0.300434	0.298745	0.244078	0.278544	0.30062	0.2684	0.236379	0.57169	0.325615	0.253066	0.315911	0.263892	0.21086	0.297297	0.174046	0.305321	0.247531	0.245967	0.225226	0.499226	0.205242	0.286652	0.181417	0.256318	0.249012	0.243722	0.384229	0.50175	0.393708	0.264855	0.495866	0.27654	0.394605	0.242942	0.39521	0.357793	0.476694
ICC5135	0.23728	0.191302	0.204363	0.0935737	0.240254	0.262314	0.143965	0.194643	0.305325	0.117358	0.116328	0.19105	0.246106	0.191816	0.19797	0.225586	0.237595	0.205296	0.175612	0.525876	0.174865	0.212504	0.22502	0.21449	0.195997	0.188867	0.240464	0.185826	0.139114	0.163917	0.213351	0.468544	0.237907	0.0473267	0.213479	0.114475	0.093321	0.152272	0.456702	0.410256	0.375196	0.23306	0.421656	0.0578606	0.342698	0.108184	0.377775	0.33705	0.426961
ICC5221	0.238674	0.255972	0.251949	0.208781	0.255495	0.253527	0.160452	0.195814	0.300748	0.178221	0.216991	0.206114	0.253514	0.256649	0.287198	0.214746	0.179006	0.202505	0.200895	0.540873	0.296853	0.286671	0.354644	0.260221	0.240518	0.281512	0.239871	0.271355	0.170633	0.194837	0.252713	0.50634	0.240892	0.16075	0.23504	0.140057	0.115807	0.242268	0.382361	0.394386	0.3738	0.294976	0.389263	0.192885	0.355263	0.134294	0.376522	0.332569	0.338324
ICC5337	0.365717	0.36886	0.345096	0.33566	0.475346	0.435818	0.31454	0.30114	0.397222	0.289745	0.350604	0.342433	0.323776	0.34259	0.399511	0.330625	0.326417	0.409223	0.276816	0.467828	0.357642	0.368847	0.426436	0.369241	0.316187	0.349873	0.400326	0.379355	0.293035	0.272642	0.387965	0.378884	0.384306	0.325458	0.37584	0.297696	0.294844	0.34466	0.433952	0.436512	0.370801	0.369801	0.440054	0.323684	0.358576	0.292668	0.376877	0.347392	0.362104
ICC5383	0.371007	0.340031	0.277976	0.369936	0.350753	0.182781	0.324056	0.364295	0.351015	0.3929	0.363082	0.388018	0.357903	0.367344	0.358615	0.406291	0.402623	0.241199	0.383809	0.469736	0.386238	0.294212	0.370406	0.318985	0.347465	0.277081	0.415422	0.369284	0.424026	0.406028	0.38926	0.441569	0.38567	0.388843	0.401827	0.399914	0.390518	0.293669	0.342423	0.350612	0.3976	0.510659	0.348416	0.386272	0.392173	0.345393	0.401859	0.374328	0.378664
ICC5434	0.340952	0.300795	0.25561	0.331399	0.332843	0.16998	0.296019	0.330281	0.331042	0.339209	0.354467	0.370697	0.383345	0.302307	0.345495	0.380974	0.360585	0.201805	0.334257	0.488723	0.34038	0.243684	0.356287	0.274822	0.318998	0.225288	0.408477	0.362002	0.388817	0.379265	0.367266	0.471686	0.360748	0.336812	0.395141	0.371853	0.360273	0.265343	0.323184	0.397466	0.447477	0.465239	0.397527	0.337504	0.441967	0.319114	0.452008	0.412493	0.405872
ICC5504	0.536372	0.568819	0.575766	0.563189	0.699329	0.499859	0.544339	0.556984	0.506536	0.545929	0.623958	0.612529	0.475597	0.540073	0.627649	0.51791	0.570156	0.595481	0.52269	0.369289	0.538776	0.535872	0.552625	0.552823	0.510106	0.53588	0.603675	0.550747	0.558763	0.552693	0.601932	0.406155	0.620966	0.580801	0.605491	0.554414	0.543117	0.550651	0.435416	0.455055	0.439533	0.57838	0.459163	0.576476	0.393244	0.534131	0.445448	0.443775	0.437829
ICC5613	0.303154	0.265858	0.257644	0.296384	0.303493	0.134021	0.249813	0.295467	0.307909	0.294972	0.301392	0.317503	0.362154	0.302584	0.321529	0.330263	0.317398	0.17226	0.287598	0.518122	0.298369	0.240974	0.319571	0.246197	0.26696	0.224794	0.370475	0.31437	0.341381	0.359089	0.339489	0.483883	0.343718	0.308621	0.346554	0.318159	0.310122	0.225349	0.32271	0.377258	0.448511	0.421429	0.410633	0.301693	0.424196	0.27303	0.451542	0.409924	0.417365
ICC5639	0.197069	0.148491	0.17178	0.21462	0.28564	0.256285	0.19003	0.160893	0.28155	0.175849	0.194887	0.193068	0.226474	0.156586	0.228984	0.212467	0.245484	0.187125	0.167924	0.585236	0.208471	0.253596	0.250438	0.199925	0.165199	0.205364	0.207342	0.216213	0.1701	0.181841	0.196662	0.453224	0.214917	0.230155	0.196802	0.194223	0.176681	0.142146	0.402723	0.40647	0.338807	0.287912	0.42774	0.191894	0.286695	0.178263	0.340465	0.282325	0.402553
ICC5845	0.248591	0.253043	0.297814	0.275957	0.248665	0.324879	0.287073	0.25305	0.315659	0.239308	0.296744	0.224963	0.170185	0.323134	0.263789	0.313754	0.252187	0.268674	0.236627	0.535119	0.31729	0.355892	0.353116	0.347576	0.270011	0.308927	0.250613	0.35776	0.257823	0.303476	0.233891	0.435557	0.254084	0.281143	0.246059	0.231599	0.243034	0.297522	0.387355	0.310936	0.225233	0.253165	0.31844	0.280455	0.263598	0.243691	0.225652	0.210546	0.316053
ICC5878	0.301924	0.279742	0.28086	0.282565	0.302083	0.141416	0.250139	0.282505	0.307846	0.275727	0.29961	0.311667	0.377714	0.286977	0.331433	0.332091	0.303893	0.188299	0.286928	0.493274	0.274044	0.236817	0.319131	0.236885	0.265731	0.228467	0.382178	0.310472	0.335317	0.322667	0.386016	0.508053	0.346765	0.307369	0.342377	0.327086	0.32531	0.244547	0.338803	0.360006	0.482826	0.391316	0.403308	0.27878	0.4189	0.283862	0.48663	0.44152	0.413108
ICC5879	0.245618	0.213811	0.236127	0.260746	0.253049	0.232745	0.228721	0.251384	0.304487	0.242555	0.268165	0.22674	0.27822	0.303754	0.243248	0.305029	0.296627	0.215736	0.2498	0.613758	0.26249	0.295522	0.331033	0.260417	0.27695	0.263933	0.278969	0.295046	0.295506	0.322857	0.277569	0.477615	0.244125	0.282377	0.259389	0.291367	0.291825	0.222451	0.457827	0.347084	0.380997	0.337808	0.366833	0.256482	0.368896	0.252757	0.383309	0.344249	0.415459
ICC6263	0.477843	0.516556	0.506233	0.486189	0.51461	0.427157	0.480933	0.464247	0.436649	0.480231	0.519483	0.499649	0.385053	0.490833	0.475645	0.488537	0.419926	0.485105	0.447368	0.34438	0.511454	0.464221	0.551918	0.493978	0.434245	0.453318	0.537556	0.515741	0.464599	0.48581	0.499688	0.499535	0.523583	0.501369	0.522117	0.448031	0.445501	0.497757	0.351982	0.376428	0.380299	0.495438	0.359316	0.506892	0.363579	0.435681	0.385762	0.379875	0.34185
ICC6279	0.338887	0.292427	0.25499	0.330737	0.336807	0.168729	0.300946	0.337856	0.325292	0.334419	0.354407	0.369761	0.39106	0.306043	0.343577	0.388278	0.376221	0.204024	0.338101	0.492738	0.33359	0.241976	0.357789	0.277197	0.322024	0.223657	0.412613	0.365572	0.398571	0.389098	0.373578	0.489738	0.363467	0.340649	0.400896	0.379009	0.366889	0.2668	0.333629	0.417619	0.471058	0.471057	0.414971	0.336829	0.457651	0.321768	0.475716	0.434032	0.432595
ICC6293	0.366963	0.326943	0.279073	0.355053	0.345394	0.177286	0.322196	0.358225	0.350305	0.365566	0.384089	0.399892	0.405167	0.319404	0.366311	0.413043	0.374903	0.214061	0.360275	0.487325	0.365127	0.266939	0.36955	0.300958	0.34567	0.243856	0.431022	0.389915	0.411869	0.398208	0.382149	0.478106	0.382458	0.352496	0.418913	0.395236	0.380742	0.29345	0.315604	0.402003	0.455025	0.480891	0.392976	0.363492	0.455882	0.34629	0.454821	0.427081	0.401164
ICC6294	0.364319	0.392338	0.328408	0.387845	0.442289	0.399686	0.363453	0.298139	0.426339	0.383159	0.392131	0.376014	0.0390651	0.349475	0.368364	0.326279	0.337309	0.365246	0.317587	0.470443	0.414403	0.381546	0.395746	0.3815	0.339286	0.362478	0.364815	0.39853	0.334087	0.35804	0.334351	0.328341	0.343382	0.376833	0.355833	0.308388	0.322445	0.357281	0.351838	0.278034	0.00224004	0.379243	0.26426	0.410766	0.218389	0.319764	0.00183066	0.0105249	0.287575
ICC6306	0.510384	0.540174	0.471629	0.490928	0.589916	0.523754	0.450932	0.453213	0.489037	0.472991	0.505069	0.519335	0.367034	0.463355	0.529052	0.434033	0.451529	0.542134	0.414959	0.409746	0.500526	0.512155	0.493012	0.486384	0.469277	0.475076	0.501955	0.444616	0.438524	0.39634	0.492866	0.408869	0.47455	0.478777	0.474297	0.462656	0.45346	0.506023	0.430852	0.405497	0.325631	0.440484	0.362578	0.494577	0.346486	0.466612	0.324937	0.334754	0.298727
ICC6537	0.475909	0.46554	0.402293	0.45803	0.523875	0.477874	0.426694	0.415362	0.518319	0.510825	0.48599	0.50325	0.363256	0.477799	0.460825	0.389718	0.49987	0.441083	0.4783	0.487833	0.42556	0.460296	0.405285	0.446159	0.496523	0.445295	0.471222	0.416065	0.506188	0.50302	0.496712	0.00338706	0.494343	0.468492	0.497708	0.464871	0.48345	0.42277	0.44085	0.353198	0.328605	0.529432	0.374849	0.485692	0.382579	0.469805	0.328053	0.327628	0.412477
ICC6571	0.23264	0.195408	0.197909	0.0935219	0.227895	0.265705	0.130891	0.182676	0.308495	0.128814	0.106871	0.187177	0.237694	0.209746	0.187111	0.21851	0.21939	0.196705	0.184286	0.543236	0.192122	0.207729	0.238532	0.200983	0.18996	0.204829	0.234635	0.179692	0.126126	0.177855	0.199128	0.448288	0.231288	0.0441211	0.208649	0.0967099	0.0672768	0.148378	0.444614	0.387676	0.361684	0.252841	0.395978	0.0651767	0.324268	0.0855503	0.360357	0.324272	0.412789
ICC6579	0.267873	0.211528	0.215535	0.10724	0.267203	0.290528	0.156602	0.205772	0.332436	0.117122	0.114231	0.226991	0.288667	0.205169	0.222289	0.251168	0.239484	0.232511	0.178489	0.545524	0.179369	0.221041	0.211021	0.230716	0.203681	0.214249	0.248843	0.204388	0.146656	0.170468	0.239212	0.469331	0.250179	0.0787982	0.227262	0.153771	0.134749	0.168788	0.468597	0.418773	0.401926	0.226642	0.426196	0.0419193	0.357914	0.144611	0.400749	0.366631	0.427794
ICC6802	0.238706	0.214951	0.220165	0.2684	0.258951	0.344546	0.241689	0.208805	0.30284	0.190057	0.206758	0.165808	0.264726	0.268935	0.238378	0.240547	0.261842	0.270247	0.210964	0.592196	0.293255	0.300417	0.263979	0.274463	0.203992	0.294961	0.0883445	0.267778	0.205825	0.179497	0.173897	0.48349	0.181974	0.249296	0.156235	0.231983	0.217712	0.228564	0.438387	0.485786	0.35585	0.217708	0.476942	0.237815	0.366667	0.228163	0.354423	0.31941	0.465381
ICC6811	0.290417	0.285141	0.283605	0.303877	0.331848	0.426538	0.291472	0.253777	0.358739	0.254232	0.287577	0.228166	0.263007	0.313489	0.266006	0.238211	0.18824	0.348507	0.220472	0.54804	0.336875	0.304409	0.317397	0.273772	0.2339	0.359249	0.19298	0.267445	0.217071	0.270911	0.199096	0.417316	0.236375	0.283302	0.231044	0.257523	0.243341	0.28775	0.415814	0.45645	0.314783	0.21483	0.469602	0.268309	0.385149	0.266102	0.314611	0.295913	0.399072
ICC6816	0.261419	0.227046	0.229108	0.126548	0.262106	0.29182	0.134962	0.200972	0.3417	0.148585	0.133173	0.208828	0.257338	0.246766	0.220333	0.244669	0.25155	0.23938	0.219222	0.53585	0.226338	0.228082	0.267518	0.242089	0.228723	0.245806	0.233708	0.213863	0.14981	0.193907	0.232509	0.426509	0.261825	0.0771605	0.23677	0.12555	0.106832	0.174334	0.447746	0.398101	0.362724	0.261976	0.390188	0.102089	0.340838	0.126065	0.361264	0.330658	0.409776
ICC6874	0.189595	0.198068	0.242393	0.230804	0.17505	0.347912	0.234854	0.192349	0.279078	0.180631	0.184389	0.14866	0.252009	0.237035	0.213957	0.246798	0.246946	0.275643	0.195669	0.606095	0.231827	0.29621	0.253989	0.262998	0.194603	0.275249	0.109218	0.243984	0.191748	0.20574	0.163403	0.500942	0.139056	0.223705	0.0791052	0.182921	0.186941	0.229258	0.481638	0.441313	0.358549	0.206106	0.449431	0.195589	0.321144	0.208906	0.358197	0.319705	0.440716
ICC6875	0.206381	0.217277	0.232029	0.271601	0.226417	0.366067	0.234982	0.212715	0.311422	0.220911	0.223481	0.15906	0.265265	0.279455	0.231941	0.256962	0.278424	0.266236	0.225224	0.60858	0.284755	0.33174	0.233862	0.292302	0.237259	0.322409	0.00694444	0.271524	0.225065	0.217773	0.176925	0.46126	0.152205	0.244353	0.0847225	0.206413	0.211881	0.216554	0.468865	0.482809	0.353322	0.227096	0.467835	0.243593	0.361258	0.228279	0.351586	0.318049	0.491032
ICC6877	0.589084	0.652233	0.591352	0.600898	0.682499	0.581663	0.598904	0.559541	0.528161	0.603838	0.637481	0.616455	0.498123	0.56269	0.584161	0.588057	0.560509	0.656343	0.56305	0.286705	0.640076	0.530656	0.676108	0.579666	0.539183	0.550251	0.661396	0.618313	0.532118	0.549773	0.557921	0.456286	0.589411	0.597387	0.642078	0.564627	0.552128	0.635835	0.405206	0.496545	0.432576	0.557934	0.463535	0.612005	0.406828	0.553104	0.434888	0.45123	0.390877
ICC7052	0.469608	0.442592	0.389452	0.402633	0.407958	0.400216	0.364428	0.395979	0.448082	0.42614	0.423371	0.480806	0.367797	0.391821	0.387028	0.437839	0.319079	0.365739	0.385181	0.43635	0.425846	0.377031	0.461809	0.392221	0.43064	0.344369	0.515386	0.396873	0.392455	0.417477	0.441872	0.38016	0.477284	0.383436	0.506308	0.408498	0.393807	0.422579	0.282287	0.249434	0.370795	0.463548	0.230559	0.402538	0.388176	0.38544	0.369809	0.369942	0.100768
ICC7150	0.424787	0.380134	0.329702	0.369099	0.459755	0.411033	0.363113	0.361483	0.457158	0.400714	0.399359	0.412609	0.327177	0.378686	0.370653	0.385917	0.38625	0.36361	0.333858	0.471615	0.374798	0.396914	0.350473	0.370232	0.386041	0.327784	0.42046	0.384433	0.398262	0.391451	0.417681	0.278115	0.457213	0.368671	0.448358	0.398167	0.392342	0.341062	0.365508	0.329351	0.319279	0.403015	0.344832	0.3802	0.324661	0.38338	0.320874	0.30869	0.349232
ICC7184	0.580469	0.569023	0.533476	0.558842	0.574704	0.423185	0.540748	0.56073	0.5	0.568698	0.586668	0.638943	0.516846	0.553534	0.547793	0.582565	0.498509	0.515403	0.535617	0.337578	0.568832	0.473546	0.600228	0.522233	0.523672	0.463639	0.653387	0.581583	0.596601	0.601039	0.620189	0.44326	0.610883	0.591203	0.646421	0.602421	0.595825	0.543529	0.384307	0.353604	0.481472	0.615834	0.328668	0.578169	0.434933	0.56206	0.483726	0.487941	0.378579
ICC7255	0.419608	0.441007	0.420563	0.398099	0.392446	0.408305	0.418143	0.376976	0.47699	0.394746	0.436538	0.450556	0.324138	0.344996	0.45321	0.372222	0.350553	0.338279	0.369927	0.436865	0.360974	0.481173	0.3415	0.435231	0.395476	0.399599	0.392142	0.421067	0.394219	0.393885	0.435537	0.364411	0.454522	0.391832	0.403317	0.357805	0.362506	0.385177	0.297547	0.289787	0.346926	0.427906	0.325039	0.416896	0.31185	0.377035	0.345405	0.333145	0.337016
ICC7272	0.742651	0.734441	0.670828	0.710224	0.687329	0.588413	0.690918	0.749188	0.633214	0.755316	0.737286	0.785714	0.660368	0.722331	0.699516	0.725762	0.675991	0.648878	0.727343	0.339469	0.719435	0.665615	0.67703	0.696088	0.724348	0.642093	0.77684	0.704996	0.744225	0.740373	0.733428	0.469419	0.788101	0.72598	0.801332	0.738737	0.739541	0.719288	0.400545	0.474471	0.560165	0.754987	0.431034	0.753975	0.576812	0.717129	0.560557	0.594244	0.453316
ICC7305	0.69012	0.670679	0.638587	0.649281	0.674181	0.500398	0.632275	0.672807	0.633793	0.676671	0.698773	0.734008	0.626099	0.678854	0.687991	0.617515	0.626278	0.585402	0.664321	0.312714	0.62856	0.593169	0.60083	0.575443	0.636501	0.613208	0.714126	0.631593	0.690608	0.661488	0.734696	0.450059	0.742384	0.678988	0.745213	0.713648	0.70653	0.618744	0.418191	0.395675	0.559957	0.711238	0.433895	0.676692	0.538883	0.680818	0.562981	0.583491	0.476854
ICC7308	0.341138	0.291141	0.242778	0.261617	0.364501	0.26466	0.221688	0.242788	0.321326	0.242583	0.232147	0.339989	0.310959	0.297867	0.266023	0.285597	0.271473	0.315903	0.265449	0.474811	0.312943	0.0314286	0.34537	0.186998	0.220523	0.224081	0.355455	0.263597	0.228507	0.256226	0.312122	0.440162	0.301767	0.255843	0.34	0.278278	0.259818	0.258319	0.360215	0.452758	0.376144	0.32663	0.437336	0.242612	0.416288	0.234486	0.377974	0.355005	0.411223
ICC7315	0.562922	0.615234	0.615761	0.575336	0.5726	0.474053	0.560563	0.560827	0.517544	0.575512	0.603774	0.6084	0.496147	0.561413	0.593905	0.565282	0.484815	0.554364	0.555464	0.322745	0.595971	0.55922	0.633485	0.583018	0.529995	0.550408	0.627244	0.589178	0.550945	0.570947	0.613845	0.51471	0.634892	0.574534	0.613778	0.527415	0.522133	0.60104	0.384605	0.389602	0.459319	0.56689	0.372508	0.594278	0.417158	0.522554	0.462191	0.468911	0.354505
ICC7323	0.672958	0.706492	0.659375	0.64	0.591129	0.546766	0.630105	0.630883	0.604167	0.706525	0.672435	0.720532	0.596539	0.678277	0.63803	0.639459	0.582519	0.639771	0.700685	0.254486	0.641105	0.583076	0.637099	0.619197	0.656123	0.61721	0.721429	0.596919	0.640469	0.629565	0.692037	0.45783	0.682782	0.649208	0.691424	0.654251	0.660377	0.665628	0.40744	0.376625	0.520292	0.666982	0.356877	0.673077	0.493601	0.649308	0.521522	0.54864	0.406582
ICC7326	0.465497	0.433737	0.35707	0.42324	0.494542	0.394579	0.37612	0.390231	0.489587	0.46661	0.456349	0.465829	0.310667	0.418531	0.394056	0.388736	0.428424	0.399225	0.429302	0.480099	0.410789	0.417668	0.397487	0.38985	0.432229	0.378522	0.461829	0.383033	0.411053	0.417288	0.421422	0.248953	0.46105	0.4201	0.485418	0.435138	0.422642	0.369168	0.348526	0.322437	0.280066	0.477314	0.309056	0.445017	0.333453	0.408283	0.278739	0.280212	0.345355
ICC7413	0.508949	0.53898	0.470513	0.4897	0.588822	0.522931	0.449749	0.452025	0.488502	0.471978	0.50363	0.518162	0.365964	0.462301	0.528398	0.433482	0.449701	0.541137	0.413984	0.409316	0.499207	0.510299	0.492344	0.485728	0.467297	0.473294	0.50049	0.443613	0.436872	0.394583	0.491122	0.408437	0.474783	0.47664	0.473581	0.460471	0.451758	0.504992	0.431412	0.404396	0.325065	0.439429	0.361844	0.493625	0.345094	0.46401	0.325208	0.33562	0.298275
ICC7441	0.541779	0.532315	0.479249	0.551445	0.561004	0.44392	0.511215	0.539432	0.485428	0.576053	0.56696	0.593594	0.54583	0.519447	0.513374	0.546226	0.502825	0.44398	0.535753	0.342402	0.564282	0.461175	0.544015	0.447381	0.518158	0.48762	0.613002	0.535389	0.589699	0.592782	0.576556	0.44518	0.576476	0.587488	0.625612	0.600103	0.594181	0.501148	0.346103	0.418043	0.52011	0.645406	0.416453	0.561022	0.529107	0.557659	0.523353	0.521745	0.434067
ICC7554	0.25943	0.197341	0.177628	0.254232	0.337845	0.213911	0.225195	0.233477	0.326626	0.256752	0.260058	0.263784	0.225042	0.238611	0.246143	0.317993	0.351372	0.162841	0.223802	0.575608	0.256653	0.296935	0.308366	0.235683	0.28297	0.198197	0.325471	0.296758	0.294649	0.285197	0.289288	0.390618	0.31205	0.264377	0.320733	0.283077	0.279961	0.202128	0.429931	0.328076	0.292257	0.377689	0.345387	0.256742	0.276655	0.245951	0.295121	0.260481	0.369859
ICC7571	0.47187	0.440564	0.39203	0.393604	0.39573	0.415363	0.358708	0.380741	0.476602	0.416977	0.415559	0.471537	0.350134	0.389864	0.377069	0.411481	0.304685	0.365755	0.400745	0.441255	0.412648	0.388221	0.457103	0.387339	0.428217	0.365512	0.508448	0.389276	0.390432	0.409102	0.421674	0.388061	0.460864	0.374715	0.492114	0.401222	0.385762	0.413478	0.310197	0.23	0.346734	0.423112	0.213514	0.394277	0.369476	0.379174	0.343992	0.350426	0.1745
ICC7668	0.574799	0.622892	0.573843	0.618536	0.722126	0.529901	0.6	0.587677	0.529465	0.61098	0.656227	0.616788	0.494324	0.547342	0.603103	0.555907	0.597674	0.606087	0.576087	0.351613	0.613319	0.554478	0.598401	0.590596	0.535264	0.553961	0.62558	0.60661	0.599621	0.595849	0.581374	0.369298	0.609768	0.639532	0.633076	0.5903	0.586956	0.584634	0.354646	0.47163	0.430702	0.629945	0.468601	0.656225	0.395783	0.578453	0.432029	0.441971	0.458733
ICC7819	0.688357	0.715296	0.643595	0.678877	0.614214	0.536238	0.643358	0.658991	0.624189	0.720109	0.684804	0.734558	0.569552	0.705715	0.66539	0.662489	0.603299	0.595543	0.707867	0.278919	0.712283	0.567695	0.634257	0.605614	0.670845	0.640863	0.707157	0.640344	0.665861	0.668553	0.684236	0.446347	0.70754	0.678153	0.722248	0.674808	0.687285	0.665764	0.399597	0.403074	0.469682	0.68949	0.394368	0.70284	0.532175	0.67066	0.470824	0.510071	0.426443
ICC7867	0.466028	0.435049	0.382617	0.387578	0.390096	0.407168	0.35125	0.37329	0.473289	0.411593	0.408073	0.465039	0.343215	0.383287	0.372099	0.405531	0.297568	0.357993	0.393506	0.438756	0.405217	0.382737	0.450888	0.382107	0.421243	0.358276	0.502673	0.38364	0.381694	0.40256	0.419519	0.38575	0.454294	0.369307	0.489442	0.394059	0.377587	0.403905	0.305332	0.225777	0.343541	0.42169	0.209886	0.385491	0.362632	0.369434	0.342593	0.344794	0.171248
ICC8058	0.47295	0.440774	0.391995	0.393797	0.395802	0.415927	0.358678	0.380613	0.477011	0.417256	0.415201	0.472012	0.350701	0.389849	0.377762	0.41127	0.304988	0.365584	0.401331	0.442169	0.411989	0.387797	0.456009	0.387257	0.428925	0.365795	0.509042	0.389704	0.390221	0.408817	0.422563	0.389303	0.461003	0.374145	0.492692	0.401197	0.385116	0.413133	0.310638	0.230258	0.34735	0.423568	0.213634	0.393915	0.37017	0.378526	0.344776	0.350679	0.175518
ICC8151	0.439177	0.425055	0.397023	0.418583	0.365854	0.361636	0.372564	0.367347	0.479159	0.452258	0.441929	0.472339	0.279693	0.432647	0.419346	0.438227	0.350724	0.337826	0.409451	0.483445	0.389275	0.456693	0.418891	0.412032	0.427592	0.381443	0.46961	0.413257	0.433027	0.455512	0.489916	0.380107	0.458591	0.401519	0.457481	0.39517	0.398675	0.396283	0.373301	0.0953757	0.283584	0.494151	0.077584	0.435038	0.222907	0.390179	0.281305	0.281393	0.251518
ICC8195	0.565612	0.538988	0.492457	0.556004	0.56551	0.384544	0.523321	0.560064	0.493436	0.586594	0.582148	0.618687	0.507818	0.571914	0.566829	0.523059	0.49734	0.456849	0.551944	0.32632	0.542243	0.477129	0.505706	0.517347	0.526346	0.491027	0.608898	0.51195	0.601955	0.601904	0.596202	0.390929	0.600727	0.592228	0.621677	0.596875	0.594246	0.497161	0.365463	0.405289	0.472879	0.638525	0.406241	0.584111	0.498178	0.558701	0.474444	0.47875	0.427821
ICC8200	0.290094	0.308891	0.231149	0.24255	0.379024	0.351499	0.184522	0.149762	0.324178	0.209677	0.230427	0.22403	0.216175	0.240736	0.278309	0.163843	0.205159	0.3	0.208498	0.510184	0.297213	0.216239	0.343964	0.214286	0.206638	0.293871	0.265001	0.226203	0.137013	0.154819	0.244232	0.408868	0.201287	0.223841	0.246888	0.181269	0.174681	0.2473	0.386504	0.430816	0.293217	0.253407	0.423212	0.218369	0.339801	0.180465	0.2937	0.264624	0.342731
ICC8261	0.502017	0.481828	0.429316	0.476104	0.561973	0.390897	0.454193	0.472044	0.483297	0.498986	0.533992	0.555886	0.337341	0.46035	0.456761	0.521835	0.546843	0.456034	0.478495	0.436457	0.477362	0.401693	0.45073	0.446474	0.478342	0.376239	0.510254	0.508878	0.522507	0.512959	0.515621	0.354147	0.523462	0.46625	0.554125	0.487436	0.496757	0.474442	0.30093	0.338493	0.287815	0.534714	0.305595	0.495107	0.35644	0.472162	0.287121	0.301514	0.344675
ICC8318	0.630822	0.6125	0.596799	0.591198	0.613107	0.460909	0.58929	0.607333	0.580101	0.643991	0.642084	0.683698	0.55524	0.641869	0.632706	0.585229	0.554752	0.528009	0.633819	0.279924	0.585876	0.576336	0.557381	0.596726	0.591741	0.583799	0.673133	0.595758	0.629494	0.64094	0.682156	0.414876	0.708323	0.623073	0.685656	0.637725	0.631295	0.55654	0.35798	0.363223	0.503167	0.666024	0.389671	0.624604	0.48192	0.608613	0.505298	0.519714	0.442687
ICC8350	0.515926	0.496521	0.48761	0.495411	0.49874	0.334711	0.501449	0.538748	0.477577	0.543159	0.549951	0.593938	0.510308	0.460588	0.510471	0.583966	0.500262	0.410579	0.530998	0.335943	0.511336	0.44698	0.526492	0.497979	0.506289	0.424858	0.616291	0.539436	0.566248	0.568902	0.529503	0.457416	0.579018	0.504331	0.594395	0.546266	0.532009	0.467805	0.392209	0.386685	0.494461	0.636949	0.366216	0.508986	0.440668	0.505158	0.496827	0.492368	0.400765
ICC8384	0.409765	0.416866	0.442224	0.366495	0.520411	0.350954	0.365979	0.430837	0.404925	0.377454	0.388632	0.445183	0.470332	0.437054	0.451369	0.450391	0.436897	0.464948	0.406953	0.389798	0.425371	0.359487	0.487088	0.402218	0.400025	0.40511	0.49126	0.408961	0.43379	0.421875	0.495831	0.47934	0.472835	0.374565	0.473947	0.446376	0.427404	0.40651	0.525558	0.466158	0.497495	0.497447	0.481658	0.326226	0.464546	0.404927	0.500933	0.486212	0.464061
ICC8515	0.26312	0.176075	0.0224733	0.221919	0.290547	0.256484	0.178597	0.193182	0.308231	0.227135	0.214268	0.22066	0.236473	0.239677	0.200314	0.258096	0.281307	0.162687	0.196488	0.578297	0.24098	0.215713	0.234675	0.182695	0.21703	0.176725	0.232689	0.225283	0.227132	0.234186	0.215041	0.378511	0.202764	0.237011	0.257809	0.256605	0.237865	0.129652	0.40574	0.415695	0.312559	0.329738	0.395788	0.211447	0.355457	0.214345	0.312873	0.276601	0.438103
ICC8521	0.492505	0.487328	0.379495	0.460678	0.493033	0.484223	0.418925	0.424087	0.501976	0.500337	0.491058	0.511628	0.351555	0.477894	0.4523	0.494589	0.471639	0.43341	0.450013	0.483479	0.477285	0.475453	0.435401	0.452087	0.478153	0.436894	0.467939	0.484375	0.456745	0.479187	0.446803	0.258406	0.463873	0.43608	0.507243	0.432648	0.440266	0.43259	0.397544	0.350098	0.319204	0.502183	0.311291	0.468105	0.328268	0.439406	0.317093	0.325114	0.375294
ICC8522	0.498104	0.541378	0.49356	0.505794	0.568687	0.53494	0.471609	0.429006	0.515501	0.512846	0.510384	0.526087	0.37042	0.44297	0.519916	0.428975	0.471328	0.552226	0.45816	0.46561	0.463121	0.533621	0.495446	0.49702	0.466164	0.495739	0.494919	0.45432	0.458959	0.464163	0.502528	0.361505	0.468285	0.501172	0.472287	0.446695	0.451577	0.47963	0.444262	0.374689	0.344006	0.481925	0.343919	0.516488	0.309873	0.465484	0.343595	0.343665	0.349512
ICC8607	0.417863	0.380195	0.383786	0.430211	0.451102	0.451029	0.402069	0.39344	0.446858	0.43556	0.427163	0.444204	0.355997	0.437925	0.399211	0.408441	0.484629	0.420471	0.434916	0.543866	0.426447	0.446429	0.379907	0.458132	0.481211	0.399036	0.372014	0.43419	0.476439	0.430476	0.440051	0.250638	0.40426	0.426998	0.387574	0.46648	0.477529	0.403869	0.444567	0.381702	0.328437	0.414906	0.385646	0.43255	0.383777	0.459995	0.328263	0.328685	0.421012
ICC8621	0.346187	0.36318	0.317138	0.384557	0.437019	0.379247	0.359788	0.31806	0.408354	0.367119	0.400435	0.368157	0.295447	0.257247	0.376469	0.373412	0.411002	0.3403	0.31027	0.515002	0.348365	0.416118	0.332442	0.362232	0.331843	0.3143	0.341622	0.409302	0.359145	0.337708	0.332944	0.337366	0.356268	0.369843	0.339698	0.340837	0.348832	0.311416	0.356845	0.381468	0.317237	0.397556	0.387677	0.378084	0.280341	0.351918	0.316095	0.292865	0.367551
ICC8718	0.235581	0.232405	0.236755	0.224668	0.31199	0.287435	0.235679	0.213052	0.305197	0.183058	0.217423	0.228278	0.253749	0.00702349	0.193594	0.260388	0.262574	0.231155	0.156935	0.558501	0.189189	0.266603	0.238694	0.255817	0.170081	0.141156	0.273934	0.266495	0.213291	0.233254	0.203571	0.466797	0.235786	0.209105	0.23918	0.19718	0.188532	0.196078	0.378197	0.406846	0.340169	0.259733	0.41222	0.194357	0.308971	0.197118	0.336484	0.297886	0.368918
ICC8740	0.228395	0.225743	0.276186	0.228041	0.243818	0.378863	0.231229	0.16257	0.299928	0.152408	0.184135	0.157497	0.221926	0.255151	0.209547	0.221811	0.201804	0.3082	0.186239	0.599167	0.213029	0.264161	0.26523	0.284433	0.185958	0.29379	0.165612	0.281073	0.130697	0.187994	0.181173	0.497912	0.153203	0.201406	0.143376	0.149319	0.165668	0.250659	0.438845	0.444871	0.32453	0.12619	0.449845	0.184877	0.328267	0.187432	0.322036	0.291413	0.429534
ICC8752	0.462248	0.458785	0.432857	0.44123	0.345541	0.387694	0.393731	0.39478	0.496408	0.479202	0.433962	0.48958	0.310201	0.460176	0.434284	0.439058	0.374481	0.357802	0.445845	0.450076	0.420364	0.48629	0.426226	0.409355	0.459483	0.430378	0.487019	0.426342	0.439733	0.438331	0.484923	0.401101	0.477338	0.421782	0.446982	0.423303	0.419628	0.428537	0.372806	0.0852149	0.310769	0.501377	0.0893976	0.453183	0.214251	0.416644	0.308594	0.312734	0.275156
ICC8855	0.408738	0.391636	0.356345	0.385883	0.333911	0.33251	0.349132	0.341444	0.450449	0.420351	0.398678	0.427202	0.267011	0.418528	0.383413	0.401428	0.326317	0.306887	0.373308	0.488813	0.369279	0.422647	0.41199	0.36734	0.407934	0.358538	0.457216	0.388718	0.40537	0.423483	0.451327	0.359458	0.42281	0.38356	0.420377	0.383191	0.378151	0.370499	0.373196	0.105894	0.283803	0.444949	0.118026	0.404837	0.205193	0.367058	0.283032	0.278161	0.271525
ICC8950	0.571346	0.627018	0.62813	0.584949	0.583729	0.483492	0.575167	0.573666	0.525918	0.585589	0.615385	0.618628	0.502682	0.571183	0.603948	0.57523	0.491536	0.566021	0.56604	0.322734	0.608552	0.572216	0.640411	0.595992	0.540274	0.566325	0.634209	0.600491	0.561154	0.578467	0.617102	0.519304	0.641439	0.588201	0.618403	0.538764	0.532976	0.614007	0.384232	0.394292	0.460191	0.571594	0.378434	0.606934	0.424528	0.534659	0.461681	0.473975	0.354112
ICC9002	0.279551	0.221729	0.224889	0.117041	0.280322	0.295771	0.142963	0.204053	0.339551	0.115358	0.118995	0.242399	0.28399	0.218104	0.238708	0.244883	0.235629	0.244265	0.189796	0.542083	0.191308	0.216056	0.230845	0.245798	0.216019	0.225184	0.241709	0.214494	0.138293	0.163904	0.248401	0.465068	0.258261	0.0635776	0.240928	0.133653	0.114497	0.176633	0.462284	0.422813	0.39823	0.231599	0.412808	0.0679414	0.362219	0.128059	0.397247	0.363712	0.418698
ICC9137	0.182197	0.204635	0.269377	0.221064	0.198385	0.348231	0.23595	0.186859	0.298457	0.170037	0.18768	0.139039	0.240642	0.206636	0.187032	0.247786	0.243083	0.27706	0.19411	0.605123	0.217976	0.284464	0.237459	0.283093	0.173515	0.265522	0.147461	0.248007	0.187455	0.23023	0.148388	0.47715	0.141229	0.198057	0.116441	0.154747	0.164372	0.205562	0.46773	0.410979	0.349351	0.176127	0.445943	0.173418	0.30973	0.188974	0.345607	0.311732	0.440755
ICC9402	0.678756	0.662543	0.630589	0.644303	0.673477	0.519346	0.608691	0.652759	0.619483	0.671733	0.671198	0.71875	0.613006	0.706482	0.676974	0.609178	0.601189	0.57721	0.672841	0.297195	0.65242	0.567767	0.632979	0.575217	0.638882	0.638071	0.705416	0.595887	0.678377	0.673939	0.733388	0.453843	0.729969	0.677131	0.735975	0.68718	0.681415	0.621586	0.408248	0.399737	0.552712	0.690676	0.421379	0.676665	0.526013	0.659902	0.55399	0.575172	0.453956
ICC9418	0.463187	0.460668	0.434645	0.442581	0.347724	0.389278	0.395125	0.396078	0.496948	0.48023	0.435725	0.490408	0.312312	0.462621	0.435968	0.440773	0.375743	0.359994	0.44757	0.450702	0.422935	0.488147	0.428009	0.412222	0.462176	0.43258	0.488046	0.428663	0.441712	0.441303	0.485704	0.400785	0.479211	0.424445	0.447434	0.425457	0.422081	0.429957	0.375153	0.0863593	0.31272	0.503289	0.0908766	0.454942	0.216388	0.419232	0.309851	0.315511	0.277043
ICC9434	0.462605	0.459509	0.432705	0.441328	0.346536	0.387857	0.393964	0.393494	0.496224	0.480027	0.433583	0.489569	0.311664	0.462506	0.43441	0.439541	0.374611	0.358586	0.446571	0.45019	0.422205	0.48713	0.426268	0.411696	0.460899	0.431847	0.486784	0.427688	0.439286	0.438541	0.48519	0.399602	0.477027	0.422108	0.446826	0.424168	0.420328	0.427951	0.374598	0.0860943	0.311216	0.501146	0.0899592	0.453316	0.214131	0.416758	0.309824	0.313888	0.27517
ICC9586	0.440329	0.42263	0.386595	0.410233	0.381307	0.351036	0.36688	0.335764	0.481668	0.434584	0.404469	0.44467	0.287575	0.451121	0.418254	0.38171	0.318535	0.346862	0.408601	0.483865	0.372197	0.438407	0.415829	0.400558	0.397245	0.407667	0.46231	0.385438	0.415299	0.419363	0.489064	0.358683	0.42955	0.421191	0.423888	0.412103	0.418136	0.358265	0.387818	0.109587	0.29546	0.436684	0.126294	0.426112	0.253489	0.394867	0.294225	0.293615	0.291091
ICC9590	0.237547	0.225671	0.238319	0.162643	0.274746	0.302927	0.171897	0.168636	0.316762	0.108564	0.143974	0.18517	0.248749	0.177859	0.241479	0.209011	0.188228	0.254879	0.141871	0.531867	0.211523	0.232587	0.240918	0.237061	0.153884	0.234494	0.187653	0.224949	0.105482	0.11769	0.196885	0.494517	0.209832	0.112782	0.180739	0.114512	0.108371	0.176626	0.446759	0.449722	0.357934	0.173958	0.452495	0.119249	0.3371	0.129235	0.356784	0.317831	0.404576
ICC9636	0.286744	0.332499	0.299822	0.329958	0.375311	0.362218	0.297557	0.252025	0.342739	0.319548	0.339324	0.316167	0.275902	0.23625	0.320748	0.328944	0.360679	0.329686	0.284872	0.518828	0.313604	0.355104	0.374795	0.3245	0.28995	0.290138	0.338185	0.354623	0.303763	0.314734	0.312941	0.346822	0.290373	0.33627	0.295481	0.279095	0.277939	0.295543	0.391858	0.367526	0.331757	0.409466	0.367052	0.335275	0.257707	0.287558	0.3323	0.300724	0.346314
ICC9643	0.454001	0.483493	0.457625	0.480183	0.49053	0.38281	0.472546	0.433647	0.406453	0.449187	0.504275	0.509244	0.39596	0.452694	0.484672	0.506512	0.398061	0.461998	0.410793	0.408066	0.476921	0.396633	0.505882	0.464745	0.383938	0.411993	0.481256	0.536302	0.453861	0.473411	0.47239	0.507339	0.458303	0.514222	0.488106	0.436613	0.452011	0.47133	0.307244	0.40478	0.401643	0.51445	0.38716	0.50563	0.408411	0.438481	0.405099	0.390834	0.368456
ICC9702	0.370583	0.345871	0.315609	0.340036	0.3057	0.311752	0.302091	0.303738	0.434806	0.37462	0.358586	0.390194	0.287884	0.374787	0.362225	0.377576	0.319649	0.271252	0.347471	0.525437	0.317991	0.393013	0.34826	0.321314	0.354316	0.330498	0.393467	0.358098	0.367132	0.377879	0.394945	0.386548	0.384689	0.351066	0.37517	0.352132	0.35006	0.287119	0.36071	0.161754	0.333529	0.429237	0.181547	0.358822	0.277059	0.334378	0.332805	0.316194	0.33143
ICC9712	0.332326	0.380174	0.348805	0.345595	0.392786	0.381411	0.329767	0.273542	0.390445	0.322406	0.348565	0.335587	0.141522	0.34375	0.36141	0.308791	0.292938	0.353017	0.269329	0.487476	0.356164	0.363773	0.391597	0.359673	0.302153	0.340747	0.359726	0.366255	0.285934	0.323374	0.344289	0.365197	0.338404	0.33394	0.327598	0.262439	0.272585	0.360831	0.363926	0.257983	0.161063	0.336372	0.270629	0.360641	0.191653	0.280841	0.162021	0.156449	0.261231
ICC9755	0.363309	0.391259	0.354802	0.359952	0.382673	0.37961	0.345883	0.2848	0.416667	0.332658	0.334898	0.364865	0.127752	0.351735	0.366603	0.296931	0.306639	0.338214	0.299208	0.473634	0.373158	0.392799	0.331519	0.37328	0.314678	0.368875	0.313522	0.376415	0.291371	0.301509	0.327875	0.368117	0.352702	0.337642	0.315383	0.271665	0.279429	0.340566	0.335367	0.286022	0.130603	0.335377	0.297852	0.368059	0.205579	0.29077	0.128949	0.130458	0.311981
ICC9848	0.365495	0.407173	0.358306	0.40121	0.440139	0.397342	0.347232	0.289333	0.439476	0.383756	0.405918	0.37412	0.152355	0.375183	0.400167	0.361257	0.347629	0.347458	0.341822	0.462343	0.400079	0.418512	0.371774	0.389912	0.345477	0.407972	0.355118	0.413296	0.324959	0.344906	0.35781	0.356695	0.360772	0.369248	0.360287	0.314362	0.315612	0.360924	0.361152	0.21633	0.147377	0.35817	0.20655	0.405259	0.136211	0.324372	0.147459	0.151141	0.29356
ICC9862	0.380793	0.376866	0.35179	0.354667	0.393577	0.375632	0.299132	0.306868	0.440455	0.366395	0.371795	0.400272	0.234375	0.370022	0.344357	0.390524	0.374771	0.340116	0.355048	0.496362	0.332225	0.386055	0.366008	0.355753	0.370138	0.341067	0.397182	0.36509	0.358229	0.377576	0.411391	0.339465	0.39534	0.323206	0.398456	0.321703	0.323292	0.345323	0.392184	0.149186	0.25192	0.426367	0.129956	0.354017	0.17376	0.315899	0.251815	0.246744	0.269332
ICC9872	0.353077	0.393365	0.331428	0.371485	0.431514	0.412454	0.349165	0.3161	0.404779	0.36158	0.393089	0.38653	0.325869	0.296278	0.409689	0.373831	0.401783	0.373851	0.316752	0.46926	0.371711	0.407787	0.36638	0.362526	0.337747	0.35315	0.363315	0.407874	0.346728	0.326881	0.370215	0.347074	0.349317	0.371305	0.351447	0.345572	0.345201	0.337818	0.433652	0.41442	0.357647	0.408419	0.412455	0.358558	0.31262	0.354195	0.359723	0.335372	0.426956
ICC9895	0.359606	0.377952	0.347938	0.345675	0.390531	0.356329	0.296021	0.300328	0.423839	0.337339	0.354627	0.366079	0.201442	0.364084	0.350037	0.362189	0.352175	0.328753	0.325432	0.488732	0.347676	0.380099	0.362126	0.355378	0.33991	0.342597	0.379395	0.362458	0.333293	0.357352	0.387181	0.361791	0.376575	0.316223	0.367572	0.286699	0.297268	0.330152	0.387875	0.175971	0.218735	0.401345	0.169384	0.344456	0.192895	0.296266	0.219404	0.215676	0.273263
ICC9942	0.335877	0.367799	0.361543	0.355133	0.431312	0.361679	0.307143	0.287693	0.403426	0.341376	0.370236	0.351255	0.198294	0.298751	0.368798	0.316579	0.323955	0.336905	0.317246	0.467146	0.356422	0.403051	0.400572	0.363737	0.306701	0.347244	0.365878	0.346	0.320385	0.340396	0.364646	0.380538	0.371515	0.328592	0.358431	0.286352	0.270305	0.329774	0.36719	0.202626	0.22341	0.390469	0.205852	0.361757	0.161842	0.280011	0.22297	0.210023	0.247565
ICC10018	0.155998	0.202111	0.23307	0.244855	0.194839	0.325309	0.208879	0.188838	0.264093	0.215901	0.208173	0.0995402	0.2556	0.248838	0.208646	0.231325	0.271784	0.256691	0.215037	0.616438	0.259108	0.32465	0.274448	0.25817	0.217283	0.289615	0.0974535	0.237175	0.220205	0.202424	0.167807	0.482685	0.11793	0.229956	0.0731707	0.185648	0.191963	0.213523	0.478272	0.435228	0.361243	0.240626	0.444001	0.229067	0.318379	0.206692	0.360919	0.323001	0.460605
ICC10341	0.203624	0.223508	0.266878	0.310085	0.31952	0.29987	0.292566	0.278474	0.1849	0.238368	0.270212	0.177424	0.328052	0.279976	0.224684	0.313443	0.340439	0.323766	0.244055	0.563543	0.354085	0.239847	0.376157	0.28383	0.231719	0.260218	0.230507	0.322539	0.27422	0.282223	0.221279	0.544666	0.191324	0.335452	0.178182	0.304433	0.295711	0.293124	0.385575	0.540158	0.411419	0.287972	0.52497	0.301533	0.428777	0.283556	0.41092	0.374967	0.450415
ICC10393	0.508484	0.542632	0.521723	0.522672	0.52971	0.45908	0.5	0.484	0.51149	0.523793	0.556064	0.552717	0.363697	0.443824	0.518201	0.462192	0.430545	0.470149	0.469317	0.414676	0.498948	0.564868	0.521055	0.546016	0.492087	0.476009	0.560137	0.517095	0.501419	0.514019	0.524849	0.395424	0.534672	0.513486	0.533258	0.468689	0.464037	0.517853	0.299194	0.27039	0.326449	0.520885	0.243379	0.542283	0.322156	0.470572	0.321977	0.334833	0.225551
ICC10399	0.366667	0.326756	0.278624	0.354576	0.344725	0.176867	0.321764	0.357753	0.350018	0.364664	0.383393	0.399784	0.404968	0.318899	0.365737	0.412466	0.374096	0.213199	0.359423	0.487111	0.364915	0.266085	0.369213	0.299977	0.345326	0.243339	0.430715	0.389902	0.410714	0.397725	0.380725	0.478004	0.382114	0.352301	0.418351	0.394249	0.380245	0.293483	0.315018	0.401651	0.454343	0.480236	0.392508	0.363252	0.455731	0.346091	0.454597	0.426436	0.399507
ICC10466	0.225998	0.146461	0.185218	0.283636	0.290387	0.275046	0.244879	0.269764	0.314995	0.265203	0.257865	0.225562	0.29002	0.289474	0.226468	0.342405	0.389784	0.182973	0.260875	0.655822	0.278805	0.335942	0.29819	0.266939	0.314396	0.256381	0.228967	0.305398	0.332298	0.338749	0.255971	0.403443	0.252775	0.306426	0.246422	0.331046	0.323964	0.214615	0.499503	0.407625	0.364262	0.328028	0.426339	0.26872	0.352621	0.294223	0.364256	0.330872	0.465162
ICC10673	0.216115	0.136902	0.121281	0.227863	0.219146	0.275799	0.211561	0.231049	0.294181	0.210597	0.230908	0.148283	0.26503	0.271564	0.160848	0.29424	0.328586	0.165996	0.21835	0.624287	0.263574	0.28905	0.253976	0.221487	0.2583	0.20827	0.179932	0.264676	0.256477	0.273002	0.175158	0.417506	0.207402	0.225286	0.201168	0.251832	0.244992	0.1657	0.43648	0.423581	0.350059	0.269698	0.444271	0.221869	0.375782	0.230875	0.349358	0.315937	0.483325
ICC10685	0.409856	0.429176	0.409356	0.382463	0.386257	0.393443	0.404347	0.363754	0.469902	0.381376	0.426756	0.436946	0.304296	0.342989	0.442313	0.358108	0.341828	0.335373	0.354952	0.439329	0.344899	0.463373	0.343399	0.420398	0.382567	0.386679	0.385433	0.406107	0.38139	0.385059	0.424554	0.356982	0.445386	0.381605	0.399117	0.345443	0.353219	0.372248	0.301889	0.289562	0.332624	0.414261	0.332778	0.405208	0.320354	0.364716	0.33034	0.318746	0.330248
ICC10755	0.405547	0.421897	0.402875	0.378778	0.376411	0.389135	0.395715	0.356223	0.464744	0.375796	0.416066	0.430985	0.304699	0.336369	0.435195	0.354854	0.338106	0.326717	0.350299	0.437627	0.338831	0.461574	0.332355	0.415559	0.375171	0.382212	0.376319	0.400793	0.375034	0.374932	0.420011	0.360726	0.44187	0.373986	0.389822	0.339777	0.346822	0.366368	0.302724	0.293427	0.335064	0.411742	0.330784	0.398582	0.31525	0.358262	0.33307	0.319139	0.342355
ICC10885	0.689991	0.723752	0.653806	0.67227	0.704557	0.584988	0.661928	0.662128	0.616697	0.699932	0.726946	0.723474	0.585005	0.669641	0.694759	0.626544	0.573623	0.648689	0.670148	0.2156	0.70684	0.607436	0.678964	0.623332	0.623565	0.673451	0.691014	0.641951	0.62931	0.641299	0.655054	0.469552	0.680906	0.688889	0.71567	0.655903	0.644074	0.681065	0.356923	0.466886	0.500245	0.665791	0.437625	0.701602	0.500248	0.649858	0.50108	0.528093	0.384348
ICC10939	0.642199	0.710485	0.65409	0.667221	0.633639	0.585633	0.646327	0.606036	0.561983	0.6795	0.683209	0.697187	0.551972	0.657479	0.679313	0.610181	0.536037	0.678972	0.642748	0.280622	0.671098	0.609337	0.671803	0.651845	0.615385	0.645452	0.675903	0.635288	0.604093	0.59237	0.663102	0.498149	0.629847	0.685812	0.639982	0.630154	0.639189	0.697649	0.382094	0.450983	0.480724	0.64526	0.41575	0.688607	0.478084	0.638063	0.4801	0.506102	0.369875
ICC10945	0.366236	0.32663	0.278468	0.354513	0.344461	0.177089	0.322014	0.357867	0.34948	0.364372	0.383506	0.399298	0.404802	0.318821	0.36604	0.411982	0.373548	0.213303	0.359479	0.485974	0.364496	0.265931	0.369249	0.300275	0.344947	0.243408	0.430782	0.389674	0.410638	0.39739	0.381478	0.478135	0.382233	0.351881	0.418238	0.394109	0.379914	0.294209	0.314561	0.401198	0.45414	0.479446	0.392031	0.36312	0.455111	0.345095	0.454545	0.426471	0.399507
ICC11121	0.2276	0.165086	0.163143	0.216727	0.318803	0.225693	0.175455	0.202211	0.3	0.221303	0.204617	0.24027	0.239413	0.202973	0.229111	0.263325	0.311788	0.140288	0.18758	0.604563	0.199474	0.273175	0.249066	0.211302	0.241955	0.184686	0.270568	0.24169	0.264272	0.263082	0.283263	0.388434	0.273709	0.23677	0.266131	0.253056	0.250904	0.146044	0.432396	0.36421	0.33227	0.34164	0.386079	0.201165	0.32215	0.217421	0.335739	0.290688	0.408854
ICC11198	0.203251	0.154868	0.212579	0.203592	0.153436	0.322399	0.20163	0.203848	0.292788	0.212504	0.170318	0.162571	0.29036	0.260414	0.166146	0.255381	0.310769	0.259621	0.224712	0.639416	0.189274	0.284485	0.216251	0.234346	0.250248	0.240529	0.133634	0.207016	0.245726	0.239827	0.216932	0.459902	0.163508	0.200776	0.099062	0.236033	0.231446	0.166868	0.51394	0.393774	0.403515	0.25651	0.40221	0.187814	0.341384	0.227198	0.402425	0.361756	0.5
ICC11279	0.180704	0.171376	0.209809	0.223214	0.235647	0.286412	0.226111	0.201196	0.280194	0.187943	0.220261	0.126048	0.248327	0.23255	0.211524	0.238175	0.257658	0.233718	0.192337	0.585616	0.259396	0.295143	0.302051	0.237761	0.187593	0.259908	0.164133	0.233213	0.195793	0.21361	0.155577	0.462757	0.134073	0.226959	0.126964	0.205443	0.189956	0.17637	0.479447	0.425508	0.351223	0.225583	0.447611	0.203316	0.308977	0.202178	0.350765	0.312281	0.430196
ICC11284	0.322402	0.349496	0.328995	0.310071	0.400552	0.298697	0.265604	0.231778	0.326217	0.261905	0.25916	0.310141	0.290439	0.355076	0.37727	0.191685	0.303505	0.340013	0.300399	0.445688	0.350826	0.194841	0.376068	0.259968	0.253865	0.342619	0.309601	0.296764	0.24162	0.232206	0.371712	0.45012	0.32535	0.303567	0.283106	0.256081	0.24837	0.313573	0.359305	0.470645	0.353978	0.310092	0.499317	0.303442	0.371899	0.244247	0.35656	0.329419	0.441109
ICC11303	0.433196	0.461356	0.424153	0.414326	0.498001	0.427881	0.379641	0.381433	0.463115	0.4008	0.439619	0.44907	0.275514	0.42997	0.464188	0.409562	0.401353	0.441484	0.36901	0.388965	0.464217	0.429344	0.496279	0.411704	0.393151	0.42054	0.46505	0.41303	0.366369	0.384546	0.444577	0.392315	0.466736	0.395657	0.45412	0.357922	0.351645	0.423287	0.432551	0.330302	0.270086	0.398749	0.321537	0.424968	0.271102	0.356737	0.269546	0.268961	0.299713
ICC11378	0.678978	0.693596	0.666108	0.640086	0.563334	0.52046	0.624213	0.65236	0.613997	0.661585	0.632163	0.731953	0.61497	0.632911	0.65159	0.646403	0.608115	0.644354	0.669139	0.358534	0.637737	0.530417	0.627573	0.591524	0.627389	0.597208	0.703451	0.616558	0.639118	0.643702	0.677404	0.505505	0.692589	0.646461	0.679677	0.633383	0.651623	0.639369	0.534787	0.474454	0.557748	0.647437	0.472372	0.644772	0.564717	0.636198	0.557593	0.584106	0.50738
ICC11498	0.227886	0.208957	0.269592	0.17939	0.255682	0.353269	0.206743	0.191929	0.302584	0.125716	0.177559	0.17004	0.266667	0.217644	0.218043	0.230411	0.201883	0.290508	0.177304	0.555871	0.236151	0.250749	0.278497	0.287383	0.190447	0.273499	0.16261	0.261227	0.13102	0.153266	0.172822	0.523011	0.178409	0.135025	0.161711	0.154426	0.138802	0.228947	0.458994	0.492936	0.373476	0.126644	0.487238	0.124242	0.366093	0.164715	0.371783	0.341492	0.425907
ICC11584	0.255754	0.204551	0.209042	0.0782569	0.259282	0.276306	0.145941	0.198718	0.32664	0.123946	0.111098	0.204429	0.268179	0.215187	0.221718	0.236077	0.242056	0.228133	0.176004	0.535281	0.183824	0.220785	0.22544	0.220423	0.200371	0.209751	0.246951	0.19209	0.136912	0.160954	0.235335	0.460093	0.243722	0.0629116	0.21799	0.13653	0.119305	0.15344	0.469323	0.417687	0.385429	0.231119	0.4235	0.0481276	0.357211	0.1315	0.38587	0.349655	0.429813
ICC11627	0.279086	0.229232	0.238458	0.13096	0.227936	0.297635	0.157364	0.210681	0.333991	0.13529	0.128307	0.230551	0.279093	0.216226	0.22327	0.242316	0.248063	0.24534	0.199872	0.517444	0.213367	0.235166	0.220793	0.242236	0.224981	0.224322	0.221301	0.205444	0.144479	0.141984	0.227114	0.47054	0.270574	0.0571947	0.224824	0.135954	0.117598	0.182243	0.469315	0.424083	0.385302	0.232386	0.419852	0.0777045	0.360699	0.134741	0.384467	0.353206	0.436722
ICC11664	0.220455	0.208955	0.242019	0.175449	0.262043	0.30525	0.156727	0.161433	0.298163	0.111581	0.128819	0.199239	0.215079	0.173072	0.227903	0.196953	0.194051	0.218969	0.152146	0.559014	0.21583	0.221221	0.265963	0.22951	0.162356	0.241598	0.199306	0.236506	0.105129	0.16449	0.19484	0.493012	0.222983	0.139581	0.190016	0.107488	0.097909	0.185327	0.423574	0.431705	0.331925	0.208441	0.435723	0.137604	0.315422	0.120921	0.331796	0.290358	0.399047
ICC11764	0.229734	0.224695	0.217808	0.18733	0.289592	0.32282	0.177535	0.164488	0.280632	0.133941	0.145889	0.183135	0.226358	0.168306	0.196411	0.218453	0.210424	0.25296	0.15324	0.556485	0.243566	0.215073	0.288065	0.217258	0.161266	0.224827	0.246624	0.236733	0.116315	0.144961	0.167301	0.487651	0.18074	0.176927	0.214335	0.147551	0.139328	0.202247	0.398699	0.437884	0.332499	0.225672	0.430258	0.146793	0.332361	0.150581	0.331393	0.29116	0.373037
ICC11879	0.585154	0.637766	0.61513	0.607143	0.560783	0.569204	0.590949	0.538704	0.583166	0.613475	0.612254	0.586983	0.472403	0.603646	0.627088	0.534535	0.475269	0.580403	0.563272	0.413268	0.58349	0.668649	0.613808	0.632966	0.581875	0.615809	0.622828	0.585152	0.557496	0.560427	0.605769	0.367878	0.595502	0.61081	0.592365	0.556296	0.573347	0.615556	0.4217	0.345288	0.426237	0.551754	0.350991	0.625938	0.392045	0.578842	0.427671	0.438336	0.32154
ICC11903	0.326375	0.337608	0.302079	0.261684	0.27548	0.335062	0.247267	0.215694	0.348023	0.225512	0.201978	0.279777	0.292689	0.29159	0.32342	0.211116	0.0899511	0.285448	0.196625	0.474392	0.305812	0.24829	0.325054	0.251633	0.197581	0.331321	0.275956	0.240203	0.17131	0.183969	0.285637	0.505626	0.285067	0.246695	0.262697	0.208379	0.19673	0.272361	0.394587	0.389888	0.377669	0.269821	0.408586	0.245004	0.369312	0.212295	0.377778	0.351068	0.321333
ICC11944	0.629805	0.722841	0.651335	0.65258	0.60737	0.547477	0.636914	0.616788	0.557821	0.660328	0.672786	0.669205	0.541243	0.622452	0.66885	0.637302	0.532621	0.655125	0.625512	0.287238	0.686521	0.609256	0.676927	0.639023	0.589432	0.612212	0.667144	0.649809	0.603413	0.60232	0.630752	0.535933	0.632863	0.64476	0.650362	0.589267	0.5981	0.679028	0.413659	0.440438	0.471323	0.640812	0.402734	0.669888	0.477414	0.607858	0.47131	0.49625	0.359989
ICC12028	0.20356	0.150079	0.203117	0.207906	0.168807	0.308968	0.207134	0.229521	0.297346	0.21325	0.155942	0.151916	0.315895	0.259816	0.15381	0.276622	0.290431	0.22437	0.232517	0.629735	0.236483	0.278519	0.214451	0.2432	0.2392	0.257541	0.144301	0.211573	0.249823	0.260048	0.17602	0.468721	0.181026	0.216339	0.145011	0.254742	0.234858	0.15495	0.514756	0.455186	0.414048	0.242971	0.464371	0.179984	0.410907	0.233551	0.414092	0.376884	0.51205
ICC12037	0.493243	0.47619	0.40556	0.456745	0.53453	0.441268	0.421336	0.471459	0.518678	0.503714	0.493022	0.526486	0.335278	0.441219	0.460833	0.491644	0.497031	0.423695	0.438697	0.434255	0.487901	0.476833	0.441667	0.448398	0.499382	0.412011	0.49427	0.475193	0.501655	0.495688	0.472951	0.299815	0.535859	0.436522	0.539169	0.478065	0.466779	0.430642	0.429531	0.338636	0.285664	0.512812	0.306967	0.467486	0.351054	0.457754	0.28565	0.298808	0.329966
ICC12155	0.233545	0.194004	0.163093	0.257884	0.248879	0.317147	0.2093	0.246559	0.287253	0.234687	0.237027	0.150149	0.275585	0.286359	0.162126	0.284766	0.322643	0.241638	0.24788	0.635655	0.287619	0.294851	0.271452	0.264925	0.284438	0.237258	0.163525	0.271425	0.263446	0.278649	0.177874	0.406323	0.191484	0.234565	0.200207	0.261759	0.25815	0.20493	0.440871	0.458889	0.349398	0.263835	0.416526	0.25484	0.422771	0.244243	0.346735	0.321037	0.470151
ICC12299	0.229961	0.18913	0.16035	0.255604	0.248564	0.315709	0.208925	0.24329	0.285766	0.23259	0.236189	0.147702	0.273933	0.28542	0.161704	0.279847	0.321545	0.241602	0.24568	0.635014	0.284613	0.292085	0.270002	0.263151	0.281981	0.23756	0.161501	0.267958	0.264847	0.277095	0.17877	0.409148	0.187627	0.2386	0.198321	0.263307	0.258254	0.203898	0.442812	0.462432	0.351307	0.264372	0.418776	0.255792	0.422989	0.243649	0.350298	0.322279	0.47054
ICC12307	0.245753	0.19837	0.229935	0.219419	0.149899	0.347703	0.20815	0.208681	0.307429	0.189661	0.175361	0.181793	0.281229	0.278486	0.172616	0.270455	0.279091	0.275051	0.222091	0.622068	0.214209	0.261259	0.233672	0.236221	0.237273	0.257934	0.135435	0.231445	0.196411	0.22451	0.184185	0.492235	0.171049	0.199787	0.144128	0.21946	0.220997	0.215138	0.504982	0.422111	0.389146	0.215403	0.399652	0.186072	0.359803	0.224274	0.387709	0.355528	0.48631
ICC12324	0.173712	0.168148	0.200369	0.213303	0.157667	0.284662	0.190617	0.189004	0.281169	0.21909	0.189683	0.150101	0.265699	0.277136	0.185833	0.26032	0.317683	0.233333	0.236878	0.633301	0.230325	0.286445	0.253257	0.214239	0.262782	0.249571	0.160039	0.225939	0.259634	0.25182	0.213375	0.431164	0.163506	0.214492	0.126686	0.225215	0.222736	0.187047	0.50704	0.385201	0.371094	0.284499	0.393525	0.215679	0.332347	0.211255	0.374155	0.333822	0.485103
ICC12328	0.63311	0.691206	0.652937	0.622205	0.622884	0.522859	0.607239	0.604686	0.536387	0.630971	0.663259	0.649765	0.538017	0.605705	0.641883	0.59542	0.520819	0.603781	0.617993	0.220156	0.648122	0.570906	0.667667	0.598601	0.583782	0.588356	0.65721	0.595825	0.586276	0.586519	0.632911	0.507968	0.63924	0.628863	0.655818	0.582377	0.575287	0.651045	0.376727	0.424522	0.485353	0.618438	0.370047	0.659187	0.42648	0.580284	0.486504	0.499635	0.379734
ICC12379	0.486494	0.475421	0.421847	0.459643	0.545792	0.486764	0.416452	0.433236	0.494082	0.478576	0.485329	0.496083	0.3667	0.480951	0.452653	0.459611	0.493163	0.480493	0.445835	0.477833	0.473186	0.464441	0.50948	0.427607	0.491104	0.431183	0.552182	0.472137	0.467265	0.471145	0.502671	0.250289	0.494741	0.471128	0.536882	0.493302	0.493164	0.463464	0.467423	0.333134	0.33439	0.493651	0.314735	0.466587	0.35651	0.47549	0.333033	0.338983	0.328801
ICC12492	0.327838	0.291223	0.305734	0.221326	0.35518	0.36913	0.255435	0.268564	0.388468	0.231003	0.276559	0.293404	0.299765	0.283597	0.281903	0.298535	0.369041	0.341286	0.27314	0.552793	0.203797	0.345439	0.256193	0.328829	0.307451	0.256248	0.329585	0.26828	0.277053	0.282961	0.340331	0.391575	0.32041	0.197079	0.305412	0.230055	0.242279	0.265096	0.42767	0.369307	0.37485	0.298622	0.389121	0.223586	0.334841	0.251883	0.374003	0.349497	0.435586
ICC12537	0.400518	0.434211	0.37481	0.425529	0.493175	0.464155	0.405571	0.368987	0.441293	0.420715	0.451457	0.431044	0.382343	0.325231	0.450168	0.421793	0.442387	0.428551	0.355132	0.482752	0.399474	0.45667	0.410119	0.40638	0.381843	0.384869	0.406204	0.45561	0.398671	0.377077	0.415925	0.355527	0.396953	0.428474	0.396205	0.406571	0.405376	0.381595	0.453348	0.435145	0.406486	0.452936	0.417746	0.414399	0.299567	0.408904	0.40824	0.383276	0.427308
ICC12654	0.304122	0.330133	0.274987	0.355909	0.374871	0.380815	0.31102	0.257704	0.369557	0.345291	0.345511	0.335714	0.265747	0.258996	0.337064	0.320023	0.356801	0.317725	0.288482	0.533139	0.322467	0.362992	0.347418	0.310608	0.290686	0.306851	0.306594	0.354084	0.30963	0.320995	0.318182	0.337212	0.295477	0.366804	0.298084	0.309125	0.310688	0.292751	0.384395	0.370835	0.313289	0.38909	0.365219	0.352381	0.257955	0.315174	0.314508	0.282956	0.381434
ICC12726	0.203066	0.176369	0.188985	0.194369	0.183183	0.295249	0.206059	0.220202	0.273869	0.186275	0.186272	0.11654	0.266521	0.20234	0.0686995	0.291026	0.269872	0.231348	0.197161	0.60331	0.220514	0.238549	0.252255	0.226553	0.211222	0.175627	0.202141	0.225272	0.213119	0.261019	0.10515	0.458878	0.137068	0.185572	0.172173	0.214198	0.203826	0.175672	0.44901	0.405179	0.365481	0.20323	0.392848	0.172606	0.370163	0.200166	0.363435	0.333108	0.423017
ICC12824	0.361143	0.371549	0.311596	0.377341	0.431356	0.395926	0.348324	0.312819	0.413199	0.361186	0.387954	0.39414	0.303202	0.278832	0.4041	0.374172	0.409067	0.342385	0.316765	0.505303	0.365491	0.407043	0.330382	0.355774	0.333498	0.348389	0.338659	0.403579	0.33448	0.316157	0.343121	0.374185	0.347665	0.366242	0.345566	0.342035	0.343125	0.31241	0.379794	0.418619	0.330391	0.4	0.409298	0.353974	0.297911	0.351614	0.331206	0.307559	0.395249
ICC12851	0.380723	0.420582	0.355301	0.429116	0.474848	0.461933	0.383948	0.337695	0.435495	0.430288	0.430056	0.41338	0.328672	0.339063	0.429355	0.336407	0.395648	0.411156	0.359995	0.48124	0.403455	0.409941	0.414593	0.342428	0.361223	0.391727	0.3869	0.370656	0.381585	0.392529	0.398932	0.300024	0.376991	0.441858	0.374438	0.385757	0.385435	0.367188	0.407341	0.36334	0.342902	0.462657	0.375899	0.425449	0.294884	0.392666	0.344873	0.324766	0.367877
ICC12866	0.259249	0.249471	0.28085	0.229603	0.279655	0.371802	0.217056	0.191717	0.305965	0.164081	0.202349	0.170553	0.294157	0.272425	0.266552	0.221988	0.230999	0.328464	0.203771	0.55458	0.290173	0.28125	0.316635	0.271243	0.219101	0.315566	0.175912	0.267575	0.112127	0.0717083	0.194192	0.533174	0.185302	0.181808	0.166162	0.186621	0.177943	0.260353	0.482412	0.505679	0.398135	0.168411	0.504525	0.1878	0.384259	0.195332	0.397124	0.364535	0.441192
ICC12916	0.256577	0.246552	0.279585	0.228363	0.278139	0.367247	0.21563	0.193387	0.304254	0.162775	0.201895	0.169609	0.293712	0.268995	0.264677	0.221437	0.231539	0.325841	0.202577	0.555086	0.288895	0.27961	0.316729	0.268603	0.216671	0.312548	0.176247	0.265674	0.11374	0.0741233	0.194857	0.532319	0.185297	0.182573	0.16509	0.185444	0.17819	0.257704	0.478401	0.505384	0.397311	0.169896	0.50315	0.187201	0.384242	0.195652	0.397347	0.365214	0.441415
ICC12928	0.27675	0.222517	0.228725	0.118465	0.283791	0.299132	0.145491	0.208525	0.348147	0.121366	0.125847	0.229957	0.27815	0.230308	0.23873	0.248818	0.241684	0.2513	0.192872	0.539619	0.195566	0.215697	0.237244	0.247139	0.217375	0.228294	0.243995	0.218992	0.146202	0.170584	0.257848	0.452881	0.263101	0.0727775	0.240894	0.143908	0.126634	0.175103	0.465903	0.422889	0.388836	0.231053	0.41695	0.0740593	0.363933	0.139874	0.389993	0.356932	0.424013
ICC12947	0.252945	0.227604	0.238164	0.159042	0.310292	0.297661	0.169331	0.164665	0.297498	0.0535168	0.159051	0.19948	0.222393	0.182229	0.241773	0.216324	0.195358	0.25111	0.138589	0.528232	0.213537	0.21149	0.26545	0.238587	0.170481	0.216724	0.22957	0.251851	0.0949693	0.110709	0.215056	0.49645	0.230312	0.11236	0.216116	0.124686	0.110115	0.210263	0.402806	0.43051	0.335618	0.169969	0.436997	0.108707	0.314378	0.128732	0.335855	0.298753	0.368802
ICC13077	0.750246	0.738744	0.672091	0.715673	0.687714	0.58933	0.693607	0.751507	0.634142	0.757745	0.742604	0.787193	0.659948	0.723784	0.703392	0.727185	0.675022	0.649166	0.728264	0.336974	0.720861	0.666719	0.67864	0.699227	0.724844	0.641686	0.77636	0.705323	0.74438	0.741472	0.739306	0.467479	0.7894	0.732517	0.805184	0.740621	0.743388	0.723317	0.40119	0.471706	0.564209	0.75632	0.429097	0.755227	0.576399	0.72254	0.563303	0.593916	0.448245
ICC13124	0.648433	0.653608	0.557392	0.622767	0.609675	0.452193	0.579615	0.636287	0.574202	0.670245	0.645596	0.697911	0.621847	0.645655	0.663481	0.599828	0.591283	0.531581	0.666623	0.317381	0.670953	0.538613	0.616707	0.577595	0.644094	0.577114	0.653537	0.575566	0.674822	0.641498	0.682553	0.441363	0.686447	0.614715	0.692997	0.652382	0.641	0.604986	0.475848	0.468497	0.561629	0.688409	0.464822	0.646883	0.575168	0.619534	0.563265	0.577753	0.485318
ICC13187	0.62913	0.667373	0.61114	0.654968	0.656735	0.529795	0.65368	0.624555	0.554758	0.644812	0.69255	0.684517	0.51442	0.5898	0.630845	0.663117	0.522656	0.58912	0.59287	0.291349	0.692103	0.573936	0.669361	0.649303	0.57921	0.584511	0.660794	0.715511	0.601903	0.62549	0.598112	0.461034	0.657978	0.658964	0.695571	0.6233	0.609386	0.661768	0.293013	0.428097	0.43122	0.641678	0.395508	0.668843	0.449076	0.604687	0.43254	0.457023	0.311942
ICC13219	0.211027	0.132252	0.151982	0.220695	0.252563	0.264975	0.209424	0.230406	0.29301	0.199416	0.217922	0.182641	0.269784	0.258988	0.204078	0.302237	0.320508	0.166799	0.210076	0.607374	0.256528	0.267258	0.247232	0.218339	0.241119	0.237401	0.192669	0.254539	0.251907	0.253422	0.207885	0.448486	0.205221	0.23712	0.19771	0.279593	0.260028	0.157148	0.464506	0.403943	0.36136	0.261507	0.418108	0.209341	0.34499	0.24011	0.362423	0.328185	0.470403
ICC13283	0.606209	0.657382	0.622406	0.612415	0.62809	0.518024	0.613982	0.589656	0.523256	0.602114	0.649851	0.655862	0.517377	0.56296	0.608922	0.642836	0.480831	0.601421	0.567154	0.279429	0.665352	0.525874	0.695561	0.622878	0.551782	0.558901	0.682578	0.668575	0.557582	0.583101	0.600223	0.506932	0.633417	0.616538	0.672314	0.580412	0.566507	0.657335	0.322468	0.428443	0.459136	0.621102	0.387272	0.624386	0.444639	0.562285	0.461801	0.479458	0.267651
ICC13357	0.675101	0.708794	0.663068	0.642511	0.594601	0.550013	0.634904	0.635636	0.605603	0.709149	0.676938	0.723979	0.599399	0.682282	0.642109	0.643308	0.586496	0.643883	0.705063	0.257386	0.64562	0.589446	0.642064	0.62397	0.661474	0.622239	0.725909	0.603289	0.645222	0.635307	0.69398	0.460605	0.68747	0.654657	0.695687	0.659683	0.665588	0.669983	0.408547	0.381966	0.522882	0.671506	0.36125	0.677505	0.49976	0.654811	0.522548	0.55282	0.407782
ICC13441	0.46307	0.495782	0.459108	0.45562	0.473887	0.389979	0.426714	0.400914	0.456475	0.444257	0.472343	0.474702	0.303243	0.395519	0.447729	0.426125	0.316947	0.412374	0.415748	0.421774	0.473767	0.455713	0.523003	0.48068	0.416067	0.421883	0.530125	0.468653	0.39346	0.416707	0.436315	0.42252	0.464165	0.439685	0.489133	0.398607	0.387804	0.468908	0.250308	0.252602	0.287804	0.445804	0.240563	0.46991	0.314726	0.392935	0.284898	0.296321	0.140519
ICC13461	0.588533	0.652088	0.59172	0.600424	0.683765	0.582285	0.601209	0.561977	0.528448	0.604738	0.638607	0.616739	0.497825	0.562424	0.585666	0.591777	0.56203	0.657629	0.563207	0.287016	0.641858	0.531507	0.676381	0.585674	0.540144	0.552766	0.660872	0.620779	0.535927	0.553287	0.556797	0.459064	0.590647	0.59794	0.641399	0.564903	0.552269	0.636419	0.404203	0.499151	0.431426	0.559093	0.465136	0.614058	0.406792	0.554655	0.434135	0.450281	0.392438
ICC13523	0.586695	0.651179	0.587395	0.599745	0.681122	0.577717	0.597622	0.558091	0.525798	0.601745	0.63666	0.614951	0.494048	0.561907	0.582467	0.588253	0.559606	0.654509	0.560426	0.288363	0.637451	0.524624	0.673986	0.57833	0.539593	0.546477	0.658408	0.618396	0.530901	0.549736	0.556188	0.455063	0.589318	0.595051	0.641804	0.562417	0.549064	0.631759	0.403654	0.498662	0.430767	0.559838	0.460714	0.611064	0.407282	0.550612	0.433248	0.447338	0.391737
ICC13524	0.353939	0.376418	0.313104	0.374684	0.43171	0.384681	0.352451	0.28758	0.41774	0.374136	0.380092	0.364513	0.0379074	0.337106	0.357442	0.318505	0.329511	0.349223	0.306574	0.466719	0.399916	0.368498	0.385435	0.372475	0.327473	0.348837	0.355739	0.386599	0.325223	0.350959	0.326546	0.321819	0.336282	0.36602	0.349726	0.29857	0.311999	0.34192	0.350307	0.273575	0.00240567	0.37783	0.260463	0.395141	0.212692	0.306131	0.0019975	0.00999144	0.284435
ICC13599	0.588398	0.651741	0.591926	0.600092	0.6823	0.580658	0.600678	0.560744	0.528118	0.604407	0.637948	0.61683	0.498323	0.562268	0.584975	0.59215	0.561766	0.656332	0.563084	0.287104	0.64154	0.529992	0.675676	0.584303	0.540181	0.550155	0.659361	0.621291	0.533124	0.551071	0.556583	0.457964	0.58959	0.597245	0.642022	0.563027	0.552296	0.63444	0.404594	0.499876	0.432315	0.558281	0.46517	0.613016	0.406937	0.553945	0.435753	0.45098	0.3917
ICC13628	0.443253	0.390405	0.393054	0.382808	0.397657	0.308146	0.360517	0.387234	0.469945	0.406921	0.404229	0.468449	0.360941	0.387452	0.434976	0.39104	0.334356	0.307419	0.385065	0.45788	0.340391	0.442804	0.354177	0.417178	0.418724	0.380116	0.47557	0.372078	0.430521	0.422902	0.46882	0.347906	0.493009	0.393373	0.455918	0.435025	0.423581	0.340984	0.35607	0.249234	0.374104	0.462364	0.26998	0.398012	0.33988	0.395708	0.372937	0.363738	0.30882
ICC13719	0.557954	0.582383	0.559335	0.538766	0.487609	0.424303	0.539448	0.531412	0.533357	0.597053	0.583818	0.607598	0.5	0.593704	0.55527	0.557795	0.503645	0.508825	0.583011	0.331561	0.502521	0.512421	0.545487	0.51755	0.528325	0.51307	0.641855	0.540187	0.568291	0.587476	0.610886	0.424081	0.600145	0.557523	0.608302	0.548829	0.553645	0.540191	0.407064	0.29226	0.482607	0.635458	0.312302	0.573749	0.377153	0.540155	0.485688	0.489465	0.447562
ICC13764	0.249712	0.268745	0.253815	0.209063	0.286086	0.348683	0.179976	0.164035	0.314004	0.158907	0.181007	0.248784	0.208821	0.180005	0.248744	0.228336	0.209444	0.27546	0.181841	0.563834	0.238427	0.226528	0.280632	0.252017	0.192298	0.253752	0.22172	0.264418	0.114418	0.171954	0.205395	0.469478	0.204338	0.162902	0.213617	0.10534	0.103324	0.229473	0.41857	0.431309	0.308109	0.248	0.395993	0.17019	0.3113	0.131867	0.308402	0.27286	0.382674
ICC13816	0.554654	0.556116	0.4652	0.528385	0.513118	0.488136	0.505249	0.492671	0.563266	0.59057	0.57614	0.561244	0.465338	0.581333	0.52523	0.480272	0.473321	0.464131	0.560872	0.490656	0.520354	0.542904	0.504822	0.500701	0.583687	0.533001	0.552418	0.50505	0.551567	0.560481	0.55039	0.15915	0.548368	0.530876	0.580563	0.55311	0.55108	0.514345	0.40743	0.352583	0.421971	0.591905	0.347521	0.564859	0.462999	0.536986	0.420609	0.431903	0.388075
ICC13863	0.418108	0.44839	0.398879	0.448412	0.531367	0.482293	0.433539	0.401622	0.456912	0.443657	0.480667	0.457962	0.378758	0.356707	0.473188	0.423375	0.455783	0.447467	0.381228	0.487661	0.421566	0.495207	0.416413	0.447815	0.412822	0.410191	0.427014	0.468798	0.429967	0.409848	0.434527	0.316827	0.434223	0.460647	0.421319	0.427419	0.438452	0.394057	0.416502	0.42621	0.381212	0.483812	0.428089	0.445488	0.346061	0.439165	0.382096	0.362299	0.417123
ICC13892	0.3396	0.354186	0.29314	0.379063	0.432424	0.394457	0.34316	0.308176	0.394411	0.374347	0.387821	0.369538	0.290783	0.305646	0.378533	0.359507	0.392142	0.345721	0.322356	0.496346	0.355106	0.393459	0.361022	0.347105	0.320715	0.340442	0.334118	0.385362	0.354221	0.359621	0.339479	0.333966	0.344298	0.406627	0.340759	0.351379	0.35596	0.299021	0.403969	0.383223	0.325036	0.428797	0.376007	0.382685	0.274656	0.349901	0.327427	0.297834	0.417868
ICC14051	0.310026	0.330194	0.270469	0.336778	0.391401	0.373311	0.288971	0.262473	0.36865	0.325833	0.35126	0.333091	0.260688	0.260253	0.344395	0.313445	0.354778	0.325024	0.282665	0.520163	0.318315	0.352108	0.342795	0.302586	0.283097	0.300057	0.308662	0.345248	0.289759	0.300414	0.317738	0.323187	0.297088	0.34939	0.300851	0.293251	0.29832	0.284414	0.364681	0.364133	0.310661	0.383921	0.361481	0.328893	0.264922	0.296836	0.3123	0.278846	0.360356
ICC14077	0.34174	0.39331	0.316497	0.371653	0.415385	0.406301	0.34191	0.309879	0.395644	0.372359	0.393008	0.367243	0.292828	0.312279	0.390259	0.355052	0.389465	0.361937	0.319477	0.457995	0.382568	0.392434	0.386036	0.347604	0.322996	0.352201	0.348291	0.389095	0.333416	0.342184	0.342008	0.322217	0.335817	0.371712	0.341007	0.314707	0.316324	0.325508	0.409173	0.396293	0.330189	0.425084	0.39832	0.370049	0.28236	0.325397	0.33165	0.306648	0.404985
ICC14098	0.38514	0.433354	0.357057	0.414723	0.43638	0.428686	0.396531	0.350299	0.436673	0.412072	0.424616	0.410049	0.307234	0.321292	0.412549	0.366869	0.432118	0.364672	0.355211	0.436106	0.404643	0.408509	0.391931	0.341509	0.356313	0.367238	0.383858	0.403003	0.378713	0.398017	0.367621	0.317123	0.373102	0.413187	0.383204	0.357206	0.36016	0.368608	0.425813	0.373083	0.322041	0.449843	0.387964	0.405625	0.271345	0.371846	0.324577	0.309735	0.365949
ICC14199	0.712697	0.690951	0.640862	0.680252	0.662865	0.539737	0.643779	0.688559	0.60431	0.707396	0.681525	0.758701	0.644997	0.689821	0.681565	0.655709	0.613521	0.616598	0.701034	0.312066	0.66581	0.608215	0.618896	0.643643	0.659585	0.626709	0.72389	0.626394	0.700619	0.681658	0.715202	0.446398	0.742164	0.718735	0.741255	0.722771	0.721357	0.646881	0.413606	0.440443	0.564039	0.712653	0.422233	0.71169	0.556138	0.694705	0.564739	0.588489	0.467266
ICC14402	0.192418	0.143157	0.179214	0.220459	0.305961	0.251361	0.196654	0.159569	0.279354	0.169423	0.192936	0.18593	0.21972	0.152401	0.222671	0.207558	0.246001	0.181948	0.164667	0.600606	0.208881	0.257555	0.237413	0.212654	0.159956	0.206875	0.212162	0.22335	0.18902	0.195382	0.204682	0.442649	0.214525	0.234569	0.18597	0.190268	0.178204	0.133764	0.389837	0.400692	0.323488	0.278482	0.431363	0.202667	0.287201	0.179641	0.323582	0.272067	0.407878
ICC14595	0.214779	0.10163	0.1855	0.223028	0.248451	0.277734	0.219263	0.24646	0.297846	0.201754	0.218291	0.207861	0.303238	0.228221	0.19659	0.31171	0.355739	0.206228	0.207928	0.652388	0.226723	0.288928	0.271696	0.234984	0.271019	0.203046	0.237375	0.258949	0.269567	0.260547	0.212526	0.447381	0.237623	0.237577	0.218004	0.28789	0.278417	0.175186	0.482278	0.432893	0.400094	0.282337	0.454676	0.204888	0.388303	0.258113	0.401765	0.36	0.482356
ICC14669	0.213685	0.102146	0.186202	0.223217	0.249184	0.279017	0.219808	0.245893	0.29679	0.200509	0.219055	0.206226	0.303433	0.229028	0.19697	0.311276	0.355686	0.206437	0.206874	0.652115	0.22667	0.289699	0.275385	0.2358	0.270729	0.203623	0.237824	0.259168	0.270091	0.260112	0.213589	0.44881	0.237685	0.239716	0.217412	0.288785	0.279727	0.175732	0.485567	0.435667	0.402632	0.28412	0.457803	0.204824	0.389213	0.257052	0.405674	0.360705	0.48379
ICC14778	0.208735	0.153207	0.189553	0.179496	0.148153	0.293119	0.200822	0.192308	0.290751	0.166548	0.170891	0.137144	0.258358	0.23008	0.108781	0.27343	0.256288	0.222437	0.190318	0.585825	0.215331	0.233415	0.237998	0.194099	0.202145	0.190449	0.198238	0.215068	0.203835	0.233896	0.127654	0.46898	0.16107	0.174273	0.177415	0.208887	0.195088	0.167908	0.450114	0.382427	0.363069	0.201602	0.387029	0.156241	0.320747	0.190935	0.362259	0.32824	0.432591
ICC14799	0.221054	0.148263	0.106696	0.166053	0.246538	0.223332	0.141917	0.158802	0.299928	0.173913	0.149578	0.164522	0.220678	0.211869	0.170766	0.221101	0.231749	0.151943	0.159693	0.564865	0.19027	0.195793	0.19514	0.140897	0.158533	0.176231	0.206423	0.161516	0.178996	0.186524	0.194788	0.423656	0.190855	0.17945	0.189055	0.191392	0.182183	0.0413524	0.42228	0.36481	0.326066	0.266458	0.383118	0.154107	0.319905	0.163626	0.32537	0.280971	0.440054
ICC14815	0.186791	0.165249	0.208044	0.225934	0.22476	0.338204	0.234451	0.190884	0.27384	0.177763	0.209512	0.112303	0.253111	0.21099	0.137364	0.25375	0.22606	0.266938	0.16736	0.609686	0.232481	0.282911	0.263676	0.24803	0.169643	0.246196	0.130413	0.254304	0.177098	0.213898	0.10487	0.496022	0.118508	0.228947	0.129499	0.21217	0.193898	0.185277	0.418378	0.444597	0.354267	0.177071	0.449372	0.195356	0.317022	0.204831	0.353039	0.313372	0.42199
ICC14831	0.174734	0.177028	0.207432	0.215341	0.199758	0.330933	0.220101	0.178101	0.253716	0.17557	0.196418	0.100896	0.248444	0.225584	0.172482	0.22547	0.234049	0.268041	0.159906	0.579472	0.257437	0.284669	0.276517	0.200177	0.164561	0.255408	0.132353	0.214863	0.165238	0.171112	0.123488	0.525333	0.102216	0.224789	0.0932228	0.204443	0.193819	0.186601	0.461348	0.444884	0.360236	0.188789	0.455532	0.192769	0.321788	0.2045	0.361978	0.320106	0.44385
ICC15248	0.517067	0.531985	0.480587	0.544613	0.658921	0.473177	0.519392	0.507772	0.468739	0.527082	0.57586	0.581077	0.428667	0.487718	0.558171	0.483677	0.531665	0.53106	0.488147	0.39665	0.535923	0.473648	0.515969	0.523726	0.466974	0.479534	0.52702	0.534188	0.539986	0.538377	0.535875	0.323606	0.543116	0.57663	0.5731	0.534432	0.51999	0.511466	0.352332	0.469225	0.391538	0.572073	0.440253	0.564876	0.373818	0.504837	0.393372	0.389908	0.424758
ICC15264	0.632738	0.631191	0.61032	0.563521	0.578048	0.465122	0.546244	0.602646	0.569709	0.601048	0.59525	0.659675	0.601471	0.639874	0.630487	0.620604	0.515003	0.578804	0.596139	0.293371	0.604397	0.546534	0.619114	0.553362	0.586365	0.568742	0.664509	0.558543	0.591598	0.546294	0.669886	0.522811	0.676956	0.566273	0.647099	0.617102	0.602352	0.582453	0.490945	0.412251	0.554327	0.588957	0.39278	0.582893	0.511268	0.58931	0.556849	0.573475	0.434822
ICC15294	0.481792	0.536102	0.480755	0.482884	0.491779	0.454522	0.451407	0.418839	0.476627	0.487483	0.500726	0.490512	0.368968	0.40949	0.457753	0.435671	0.335925	0.42711	0.424519	0.390875	0.510037	0.463748	0.541696	0.459431	0.443312	0.455624	0.531618	0.484645	0.422912	0.450169	0.451605	0.394424	0.45717	0.457886	0.501604	0.430287	0.414217	0.496501	0.286645	0.284146	0.346326	0.443073	0.259904	0.489785	0.303589	0.423562	0.342297	0.353067	0.163896
ICC15333	0.630624	0.61176	0.59608	0.590122	0.612778	0.458586	0.587975	0.605457	0.579611	0.64339	0.640633	0.68371	0.554958	0.641665	0.631585	0.58557	0.552817	0.527625	0.6326	0.278454	0.585566	0.574166	0.55692	0.594036	0.589535	0.583141	0.672202	0.594227	0.627514	0.639308	0.68211	0.412745	0.70688	0.621816	0.683735	0.637136	0.630112	0.555988	0.355647	0.35926	0.502267	0.664115	0.386866	0.623669	0.479884	0.606669	0.503946	0.519655	0.440189
ICC15406	0.713033	0.689252	0.639244	0.67865	0.660962	0.534838	0.64134	0.687374	0.602903	0.707629	0.679286	0.760312	0.645128	0.687629	0.680785	0.653553	0.61331	0.615141	0.699162	0.310553	0.664419	0.603752	0.618625	0.641519	0.657895	0.622449	0.723978	0.622581	0.700354	0.682426	0.716965	0.443763	0.741353	0.717905	0.740823	0.72205	0.721709	0.644285	0.415832	0.440124	0.565627	0.713461	0.421722	0.708897	0.557487	0.693384	0.564707	0.588829	0.468562
ICC15435	0.644181	0.632073	0.564486	0.603794	0.730082	0.547899	0.56309	0.616802	0.580242	0.636238	0.6264	0.675461	0.536354	0.649547	0.623534	0.572861	0.65182	0.606852	0.628796	0.322763	0.630561	0.490457	0.586594	0.534726	0.59035	0.584972	0.668942	0.544669	0.627284	0.632273	0.658029	0.401795	0.658702	0.626518	0.688911	0.630733	0.632285	0.567278	0.442068	0.470935	0.462336	0.648441	0.455239	0.631273	0.491203	0.60855	0.463023	0.485735	0.496026
ICC15510	0.568601	0.598859	0.607322	0.588916	0.723616	0.527524	0.574172	0.591921	0.532194	0.577093	0.655976	0.644708	0.507192	0.567915	0.658986	0.546037	0.597535	0.626375	0.555303	0.3673	0.568312	0.567038	0.575242	0.578272	0.543377	0.566145	0.630562	0.579749	0.589353	0.58067	0.630299	0.41372	0.653325	0.606952	0.635379	0.585058	0.572047	0.581913	0.447017	0.472451	0.460179	0.60187	0.471254	0.604925	0.415305	0.566532	0.463605	0.471051	0.449297
ICC15518	0.668202	0.697795	0.635905	0.664042	0.701009	0.545917	0.635899	0.644068	0.584954	0.669361	0.699623	0.689865	0.568163	0.648657	0.672902	0.609466	0.548093	0.622144	0.651054	0.238149	0.685936	0.584547	0.665243	0.62251	0.609803	0.646757	0.668956	0.622429	0.64227	0.641822	0.666402	0.44756	0.669362	0.682626	0.687519	0.63752	0.634467	0.660296	0.356128	0.436194	0.491145	0.648177	0.412552	0.687899	0.495876	0.631787	0.491385	0.513624	0.381837
ICC15567	0.293078	0.23336	0.232175	0.226513	0.233906	0.195495	0.208455	0.259607	0.35812	0.233887	0.255379	0.2855	0.314877	0.22451	0.268365	0.312518	0.25675	0.14775	0.235898	0.540738	0.241255	0.289928	0.277764	0.244097	0.277862	0.20356	0.331187	0.288431	0.280058	0.274042	0.313586	0.472784	0.334106	0.211403	0.306353	0.250187	0.234071	0.206463	0.367197	0.312095	0.407841	0.366111	0.334609	0.216809	0.374019	0.220966	0.406908	0.370831	0.359272
ICC15606	0.215497	0.147841	0.122651	0.162089	0.250991	0.212783	0.137365	0.174893	0.305346	0.175539	0.144164	0.17809	0.235579	0.187485	0.182305	0.207956	0.247355	0.150803	0.167347	0.577929	0.170959	0.211193	0.173994	0.162354	0.157316	0.17153	0.20556	0.149306	0.188962	0.201628	0.204577	0.409954	0.213824	0.168783	0.187585	0.185613	0.176612	0.00730539	0.442979	0.366379	0.344609	0.274813	0.403033	0.147136	0.339962	0.159815	0.344068	0.300715	0.45655
ICC15610	0.292651	0.252708	0.250255	0.205027	0.297317	0.321671	0.23537	0.243015	0.369198	0.214479	0.216011	0.268762	0.30231	0.248478	0.257379	0.252483	0.310863	0.269718	0.215679	0.562167	0.0864751	0.300903	0.114007	0.268476	0.235301	0.219705	0.3022	0.191723	0.255938	0.275223	0.313202	0.411881	0.286023	0.212249	0.265546	0.235891	0.243979	0.1967	0.477838	0.396423	0.398985	0.238182	0.435023	0.17912	0.373617	0.244999	0.398083	0.365841	0.475248
ICC15612	0.260776	0.190395	0.17467	0.222222	0.263249	0.265653	0.202649	0.21774	0.326571	0.220236	0.193723	0.26087	0.248666	0.126576	0.16766	0.298737	0.307702	0.182262	0.203321	0.575275	0.214905	0.225341	0.247393	0.220602	0.227868	0.140375	0.290051	0.255658	0.249704	0.283865	0.220335	0.404176	0.267656	0.222184	0.277082	0.232952	0.221996	0.158551	0.36416	0.345424	0.328639	0.333599	0.338112	0.210325	0.30249	0.207936	0.328114	0.292285	0.367739
ICC15614	0.279755	0.250797	0.227517	0.224818	0.317371	0.285657	0.235152	0.240445	0.329317	0.227904	0.239035	0.266495	0.256548	0.123458	0.185514	0.286156	0.280947	0.227589	0.201504	0.544168	0.204171	0.268869	0.263409	0.24917	0.229094	0.13168	0.345223	0.242456	0.267439	0.284698	0.257133	0.397798	0.287488	0.221768	0.317894	0.258033	0.252204	0.200515	0.371666	0.320685	0.327412	0.31715	0.330998	0.214095	0.334554	0.237295	0.326245	0.293071	0.342624
ICC15618	0.25935	0.19005	0.174543	0.221853	0.262786	0.265327	0.20217	0.217105	0.325736	0.21971	0.193595	0.259865	0.247913	0.125882	0.167027	0.297849	0.307374	0.181792	0.202609	0.574601	0.214023	0.224891	0.246914	0.219602	0.227543	0.139482	0.289011	0.254695	0.249526	0.283032	0.220323	0.404812	0.266507	0.222146	0.276217	0.232448	0.221434	0.15799	0.364476	0.344861	0.328383	0.332611	0.337728	0.209677	0.301585	0.207354	0.327689	0.291822	0.367983
ICC15697	0.710913	0.688883	0.639278	0.679262	0.663853	0.539446	0.643718	0.689785	0.604743	0.707869	0.681785	0.759805	0.644337	0.690209	0.682745	0.654854	0.615225	0.617098	0.701177	0.314372	0.666008	0.608315	0.620103	0.644326	0.659817	0.626555	0.725452	0.625741	0.702209	0.683056	0.715992	0.446933	0.741846	0.72031	0.740868	0.722778	0.722289	0.646903	0.41638	0.443009	0.564961	0.715018	0.42497	0.712017	0.558746	0.694741	0.565738	0.589638	0.471581
ICC15762	0.559269	0.589204	0.583241	0.575826	0.691071	0.483304	0.569452	0.569428	0.527338	0.561185	0.622273	0.614888	0.492497	0.523139	0.610502	0.539527	0.58962	0.563619	0.542983	0.337298	0.537763	0.548865	0.519947	0.575339	0.519331	0.528225	0.598592	0.571085	0.585894	0.572108	0.602003	0.398082	0.647082	0.593382	0.614035	0.561396	0.559588	0.54738	0.397371	0.461931	0.44785	0.584378	0.480534	0.596797	0.403373	0.550184	0.449132	0.454409	0.465126
ICC15785	0.31437	0.32512	0.276881	0.293921	0.319976	0.29839	0.280085	0.27867	0.384267	0.297815	0.322856	0.326271	0.285714	0.238331	0.321636	0.314394	0.3277	0.233	0.26679	0.46534	0.306339	0.332145	0.317774	0.262538	0.287332	0.261002	0.337029	0.326597	0.298659	0.313459	0.3135	0.370567	0.327735	0.289409	0.316822	0.267784	0.258835	0.263334	0.391476	0.318208	0.337052	0.39491	0.339568	0.28848	0.26964	0.26614	0.338718	0.31343	0.341539
ICC15802	0.574612	0.622664	0.573895	0.618278	0.722208	0.529733	0.599953	0.58749	0.529084	0.611074	0.655679	0.616455	0.493996	0.547197	0.603116	0.555388	0.597781	0.606282	0.575645	0.351705	0.613128	0.553966	0.59801	0.590066	0.534866	0.553386	0.625518	0.606528	0.599551	0.595974	0.581031	0.36954	0.609849	0.639411	0.632887	0.590012	0.586811	0.583992	0.35498	0.471312	0.430533	0.629537	0.468519	0.656192	0.396123	0.578138	0.431951	0.441636	0.458647
ICC15868	0.202381	0.201706	0.234862	0.27248	0.2521	0.365414	0.238023	0.228796	0.297598	0.228605	0.234821	0.158619	0.247002	0.298619	0.247566	0.260531	0.292708	0.280006	0.216599	0.637827	0.288583	0.346436	0.24498	0.310018	0.24445	0.31923	0.066545	0.27745	0.233962	0.239125	0.194045	0.443842	0.167422	0.251581	0.0821825	0.203159	0.216097	0.217973	0.470531	0.47602	0.329391	0.241633	0.47	0.257516	0.370817	0.230497	0.326664	0.294638	0.486668
ICC15888	0.207296	0.161589	0.182886	0.260151	0.210375	0.297287	0.23809	0.227408	0.310723	0.229716	0.250121	0.177962	0.269166	0.269523	0.17261	0.324069	0.36158	0.177149	0.25425	0.648912	0.254954	0.305616	0.241067	0.239008	0.287419	0.239525	0.191722	0.290869	0.284878	0.289888	0.187603	0.43778	0.187214	0.247978	0.204829	0.262261	0.272364	0.198594	0.442179	0.402347	0.352592	0.28763	0.414989	0.247146	0.349879	0.261852	0.351826	0.322013	0.50667
ICC16207	0.281434	0.237409	0.231822	0.171214	0.25593	0.292358	0.22288	0.253719	0.340029	0.207512	0.165014	0.250479	0.27125	0.233651	0.241119	0.251712	0.236689	0.23862	0.205882	0.526559	0.234232	0.300449	0.217646	0.261176	0.24803	0.23424	0.237767	0.19824	0.230155	0.232866	0.224172	0.428047	0.294649	0.135177	0.228472	0.211055	0.191837	0.17495	0.449292	0.396176	0.352487	0.290361	0.406195	0.153149	0.36528	0.200907	0.352141	0.322161	0.425723
ICC16261	0.279355	0.205994	0.195601	0.246927	0.342146	0.252878	0.226696	0.249364	0.336173	0.235615	0.268588	0.246922	0.278683	0.26997	0.260264	0.290066	0.333289	0.178234	0.237755	0.560495	0.22356	0.298218	0.229607	0.226771	0.273843	0.241203	0.308779	0.258616	0.287113	0.269783	0.278986	0.394769	0.273247	0.269064	0.278328	0.30081	0.287673	0.184588	0.409503	0.380107	0.34968	0.305709	0.401869	0.241431	0.327048	0.271136	0.351201	0.319526	0.441635
ICC16269	0.301562	0.228704	0.204702	0.284263	0.26447	0.252721	0.248798	0.247946	0.337343	0.28487	0.274612	0.285211	0.310322	0.323486	0.289248	0.309737	0.270552	0.149495	0.259541	0.553123	0.286207	0.326668	0.297317	0.245869	0.293986	0.274744	0.342913	0.285418	0.318706	0.316092	0.321088	0.429082	0.306882	0.31735	0.328372	0.331979	0.328293	0.224657	0.352985	0.331031	0.383329	0.384732	0.350843	0.285809	0.385232	0.303522	0.385801	0.349932	0.387503
ICC16374	0.332125	0.315465	0.320239	0.397773	0.250288	0.255923	0.368144	0.385207	0.33034	0.412354	0.388143	0.340869	0.426647	0.430857	0.328563	0.454087	0.411345	0.29102	0.425694	0.53422	0.423403	0.336932	0.410383	0.352991	0.395773	0.344807	0.324082	0.408499	0.467278	0.440578	0.352891	0.492377	0.314161	0.414199	0.319845	0.424434	0.433143	0.348099	0.361136	0.420815	0.474165	0.473976	0.398672	0.412477	0.485123	0.400772	0.475952	0.449222	0.466012
ICC16487	0.248833	0.267129	0.252894	0.207699	0.285336	0.347727	0.178928	0.163019	0.313786	0.159229	0.180362	0.248709	0.206734	0.180318	0.250558	0.226383	0.209796	0.274818	0.179932	0.56334	0.236456	0.225982	0.279889	0.251976	0.19135	0.253755	0.22104	0.263432	0.11432	0.170906	0.206622	0.467987	0.205006	0.16129	0.213494	0.103234	0.101431	0.228172	0.419396	0.433733	0.307562	0.249469	0.397604	0.168895	0.310967	0.128992	0.308276	0.270645	0.383131
ICC16524	0.283303	0.220516	0.137447	0.227031	0.266286	0.308262	0.192308	0.221814	0.301734	0.250262	0.200303	0.233324	0.282927	0.24116	0.200656	0.270593	0.290249	0.229336	0.198176	0.534683	0.260126	0.244097	0.258946	0.186952	0.233858	0.19287	0.263393	0.206143	0.220464	0.218978	0.21274	0.42961	0.212563	0.236202	0.231919	0.256303	0.243376	0.160962	0.450494	0.413542	0.371687	0.341343	0.391216	0.220665	0.343216	0.227325	0.372256	0.333939	0.415038
ICC16654	0.710564	0.689097	0.63939	0.679165	0.663861	0.538951	0.643276	0.689067	0.60496	0.708108	0.682431	0.760076	0.64417	0.689777	0.681656	0.653593	0.615444	0.61736	0.700997	0.313685	0.665877	0.608808	0.620861	0.643364	0.660396	0.626333	0.726141	0.6259	0.701821	0.683245	0.714933	0.445908	0.742105	0.719905	0.740922	0.722818	0.721382	0.646657	0.414896	0.443753	0.565156	0.714124	0.426218	0.711869	0.558831	0.694823	0.565065	0.588609	0.471214
ICC16796	0.652818	0.742368	0.679451	0.69447	0.687237	0.56716	0.688659	0.638696	0.633118	0.709656	0.72583	0.681486	0.571762	0.722074	0.740391	0.611233	0.576427	0.636729	0.688091	0.307503	0.712201	0.628069	0.673893	0.624025	0.629758	0.721461	0.682849	0.649062	0.639546	0.636211	0.68702	0.451344	0.684538	0.707123	0.695613	0.639187	0.659592	0.67554	0.453744	0.497962	0.493311	0.668787	0.526171	0.735986	0.543364	0.656173	0.497056	0.522281	0.490926
ICC16903	0.213069	0.100804	0.18445	0.223801	0.248919	0.278846	0.220956	0.246087	0.297067	0.200612	0.217993	0.206332	0.302574	0.230317	0.196939	0.311127	0.356822	0.206442	0.208224	0.65266	0.226636	0.289658	0.275837	0.236333	0.270997	0.203733	0.238125	0.259853	0.271971	0.262955	0.212369	0.450378	0.236608	0.23869	0.21599	0.288669	0.280612	0.176756	0.487564	0.433915	0.402974	0.284183	0.455978	0.204914	0.389822	0.256848	0.404357	0.360061	0.483613
ICC16915	0.214306	0.10074	0.18501	0.22266	0.248564	0.277249	0.219971	0.246863	0.297555	0.201621	0.217297	0.207522	0.303518	0.228277	0.197779	0.310302	0.355564	0.205653	0.207056	0.652414	0.226443	0.288901	0.274213	0.235059	0.269594	0.202506	0.237797	0.259302	0.269655	0.261134	0.211127	0.448055	0.237376	0.237402	0.216338	0.286873	0.278238	0.174933	0.484113	0.433842	0.400262	0.283248	0.454601	0.205046	0.388322	0.256293	0.402516	0.357993	0.4827
ICC18679	0.609122	0.659974	0.62618	0.615	0.63012	0.521262	0.617921	0.592427	0.524092	0.603344	0.652741	0.659177	0.520777	0.567664	0.611179	0.646297	0.482996	0.603866	0.570142	0.279194	0.668477	0.531259	0.696601	0.626521	0.555293	0.562931	0.68543	0.671584	0.560914	0.584651	0.60109	0.5092	0.635288	0.618757	0.672904	0.581901	0.569225	0.660984	0.323617	0.430056	0.460808	0.621366	0.389158	0.626693	0.44525	0.567403	0.463062	0.483033	0.267857
ICC18699	0.559591	0.605811	0.545288	0.580018	0.611925	0.441297	0.552677	0.54897	0.498188	0.571429	0.601491	0.585238	0.49523	0.568578	0.602046	0.528242	0.450704	0.508852	0.543179	0.268124	0.616608	0.503539	0.575932	0.546963	0.50817	0.558785	0.589876	0.551884	0.552228	0.553208	0.564103	0.467623	0.567255	0.610418	0.59988	0.56212	0.558026	0.554465	0.3213	0.444106	0.448535	0.557489	0.431984	0.614507	0.449252	0.550357	0.450857	0.460588	0.395324
ICC18720	0.689908	0.690082	0.629888	0.655938	0.641035	0.523425	0.652716	0.692246	0.616792	0.714744	0.690763	0.736622	0.600801	0.651287	0.646475	0.63978	0.612674	0.590844	0.688809	0.260507	0.66071	0.576377	0.611549	0.604114	0.649197	0.591555	0.704734	0.616225	0.702155	0.690488	0.681045	0.412092	0.72625	0.677866	0.743342	0.700268	0.68999	0.639429	0.401322	0.401395	0.514202	0.734712	0.388743	0.695273	0.524677	0.673077	0.513725	0.543357	0.417617
ICC18828	0.664748	0.645416	0.596901	0.633132	0.647845	0.489091	0.601522	0.644095	0.582824	0.655458	0.662455	0.719486	0.595151	0.639509	0.633302	0.621985	0.577608	0.572331	0.656905	0.303145	0.61822	0.558647	0.596345	0.595587	0.617793	0.577577	0.707469	0.59784	0.65472	0.655755	0.679169	0.437659	0.700407	0.667573	0.720481	0.681497	0.675546	0.603907	0.365511	0.395076	0.525722	0.663869	0.390811	0.6601	0.533309	0.649305	0.525794	0.547272	0.421121
ICC18836	0.625755	0.620458	0.573152	0.586687	0.596311	0.442208	0.561401	0.618063	0.544181	0.630743	0.596968	0.682445	0.583083	0.629886	0.637241	0.572839	0.551047	0.520247	0.635259	0.290751	0.608787	0.540496	0.543363	0.588922	0.595226	0.56731	0.645437	0.537542	0.643127	0.617485	0.676621	0.425549	0.67576	0.624745	0.656293	0.634625	0.633397	0.553092	0.382971	0.422488	0.528417	0.65713	0.417363	0.623215	0.531887	0.607279	0.527213	0.541357	0.457425
ICC18839	0.590922	0.60037	0.585587	0.525129	0.530394	0.489133	0.538398	0.543983	0.549856	0.578538	0.595451	0.627714	0.559839	0.59575	0.579093	0.567332	0.483892	0.560375	0.582498	0.31851	0.523646	0.507129	0.561024	0.555388	0.551107	0.522687	0.654336	0.544258	0.575678	0.566095	0.637765	0.43076	0.629541	0.531157	0.633349	0.551961	0.55687	0.559599	0.408037	0.388242	0.531361	0.596357	0.387524	0.554716	0.494819	0.54805	0.533685	0.543501	0.444951
ICC18847	0.634146	0.614804	0.602091	0.571112	0.582088	0.459242	0.556263	0.60386	0.549183	0.59007	0.596284	0.66488	0.588729	0.638348	0.63174	0.61949	0.523022	0.573538	0.576944	0.305994	0.603593	0.549236	0.621528	0.562356	0.581736	0.547861	0.670347	0.564883	0.599457	0.551801	0.680983	0.506453	0.689449	0.576582	0.649911	0.616255	0.614132	0.587585	0.486055	0.408751	0.542923	0.588592	0.400158	0.588459	0.519735	0.590599	0.544634	0.558389	0.418533
ICC18858	0.510725	0.453673	0.405901	0.489212	0.49176	0.482672	0.479594	0.47427	0.508065	0.509476	0.465343	0.494574	0.376381	0.461954	0.400491	0.416813	0.514062	0.455255	0.469256	0.49961	0.451075	0.476149	0.406493	0.452036	0.478793	0.40959	0.459959	0.400997	0.515925	0.509381	0.445452	0.273183	0.484748	0.484882	0.489537	0.499227	0.501025	0.43904	0.397175	0.34108	0.338811	0.487343	0.356096	0.502074	0.365872	0.490544	0.336092	0.348141	0.3686
ICC18912	0.629898	0.619002	0.563114	0.619769	0.572026	0.511297	0.599544	0.62846	0.551977	0.641876	0.606367	0.663234	0.559392	0.680062	0.596487	0.645864	0.532665	0.56186	0.627356	0.249418	0.677922	0.542136	0.611501	0.617478	0.614964	0.593675	0.610582	0.634844	0.635422	0.619892	0.620494	0.452788	0.645256	0.636922	0.643895	0.65515	0.65511	0.618705	0.428892	0.443462	0.48088	0.611711	0.403425	0.627107	0.540913	0.628235	0.48269	0.509801	0.415437
ICC19095	0.693718	0.673114	0.615702	0.656791	0.647026	0.493915	0.621156	0.659757	0.578973	0.693664	0.674453	0.724689	0.618483	0.657651	0.652552	0.628407	0.59018	0.578079	0.679467	0.296182	0.656986	0.582923	0.615809	0.631985	0.650112	0.593094	0.710848	0.594037	0.687869	0.67177	0.693388	0.404709	0.72734	0.677612	0.723574	0.677371	0.675252	0.630508	0.374904	0.427597	0.549725	0.702321	0.412435	0.691286	0.514017	0.656224	0.550875	0.566092	0.453516
ICC19100	0.606817	0.642503	0.616385	0.587237	0.568457	0.463923	0.562436	0.56972	0.566765	0.62526	0.630357	0.651511	0.504331	0.627958	0.600838	0.623734	0.519058	0.54678	0.61046	0.280569	0.617451	0.517567	0.614427	0.548811	0.58526	0.561028	0.689834	0.59018	0.58095	0.593734	0.64029	0.489446	0.640205	0.58713	0.656242	0.585893	0.597021	0.591652	0.383805	0.328388	0.44515	0.600696	0.323575	0.610087	0.437836	0.582624	0.447388	0.471593	0.375448
ICC19169	0.637032	0.719937	0.705823	0.648804	0.607709	0.546424	0.66024	0.616239	0.612868	0.658668	0.660198	0.670322	0.554701	0.618498	0.678691	0.606535	0.528202	0.64678	0.625928	0.250568	0.657049	0.593801	0.659012	0.614007	0.597697	0.627795	0.669234	0.633436	0.613599	0.581873	0.663365	0.505899	0.668225	0.639886	0.629756	0.60466	0.619202	0.679232	0.450697	0.41471	0.47317	0.581647	0.424558	0.669886	0.465836	0.63357	0.474876	0.504377	0.388211
ICC20259	0.570058	0.624236	0.626028	0.583054	0.581226	0.481028	0.572042	0.56972	0.524738	0.58356	0.61264	0.617111	0.501177	0.568784	0.602212	0.570872	0.489051	0.56424	0.563195	0.32215	0.605277	0.569617	0.640754	0.594291	0.538337	0.563429	0.633038	0.597976	0.559344	0.575437	0.616213	0.51662	0.63905	0.585952	0.617395	0.536426	0.530597	0.611408	0.382836	0.394531	0.458661	0.570686	0.377157	0.6044	0.422389	0.533241	0.462775	0.472708	0.352949
ICC20260	0.663549	0.643753	0.59424	0.631989	0.645064	0.48536	0.598661	0.641901	0.581492	0.654266	0.660142	0.718187	0.59375	0.63633	0.630451	0.619866	0.57519	0.570142	0.655132	0.302441	0.615979	0.555755	0.593713	0.593831	0.615442	0.575462	0.705984	0.595133	0.652748	0.652974	0.678164	0.435373	0.698129	0.665236	0.719541	0.679535	0.673129	0.60122	0.363568	0.391836	0.523906	0.663069	0.387418	0.658035	0.52974	0.646757	0.525058	0.544977	0.419224
ICC20261	0.497793	0.489393	0.4607	0.481323	0.376016	0.423285	0.421324	0.422197	0.529401	0.515358	0.455084	0.5245	0.341492	0.488878	0.468048	0.46661	0.381818	0.38645	0.46482	0.461212	0.450296	0.511752	0.459734	0.443187	0.492138	0.461849	0.488636	0.460174	0.473942	0.470017	0.511789	0.414002	0.508606	0.450913	0.477532	0.451116	0.449169	0.45563	0.406689	0.130108	0.328599	0.513408	0.108868	0.497304	0.230599	0.447205	0.328486	0.337267	0.299177
ICC20262	0.493568	0.541678	0.543478	0.537864	0.503852	0.375496	0.514995	0.479724	0.486866	0.542897	0.544212	0.559792	0.451275	0.487156	0.564793	0.479241	0.459797	0.435866	0.512081	0.382341	0.50196	0.508507	0.492451	0.503696	0.471133	0.508858	0.538582	0.507116	0.514142	0.523025	0.561198	0.420399	0.558512	0.558971	0.52701	0.495011	0.509017	0.503927	0.298201	0.349311	0.435711	0.574687	0.393931	0.551351	0.376806	0.503836	0.435183	0.428882	0.364127
ICC20263	0.572334	0.545913	0.498368	0.539726	0.519489	0.376367	0.531332	0.565959	0.508537	0.566667	0.564256	0.625035	0.485911	0.538248	0.536383	0.528411	0.489716	0.436098	0.540139	0.385321	0.527511	0.460761	0.49585	0.532988	0.525984	0.45288	0.607237	0.530547	0.588927	0.615405	0.563674	0.356216	0.613529	0.559242	0.633919	0.567988	0.562301	0.516014	0.336016	0.399732	0.448638	0.618993	0.393939	0.567686	0.483206	0.532132	0.447645	0.456076	0.400168
ICC20265	0.411052	0.431722	0.417798	0.439389	0.405006	0.379874	0.414011	0.354886	0.458008	0.429901	0.453733	0.436314	0.200603	0.420962	0.44386	0.402407	0.307888	0.350017	0.374623	0.448756	0.430076	0.481965	0.453538	0.451306	0.397678	0.426462	0.436711	0.459395	0.403364	0.427517	0.439234	0.379025	0.43216	0.439631	0.41972	0.369873	0.382251	0.416208	0.310839	0.145	0.18989	0.42167	0.147863	0.465906	0.203281	0.37808	0.189882	0.18692	0.22834
ICC20267	0.542014	0.622585	0.579169	0.556414	0.579349	0.477624	0.57834	0.558689	0.521771	0.563848	0.608619	0.549323	0.579891	0.558021	0.621166	0.555863	0.482482	0.546856	0.535438	0.348187	0.595512	0.526278	0.629248	0.50037	0.498197	0.546681	0.63641	0.566702	0.556262	0.52264	0.586117	0.52966	0.582142	0.566109	0.605154	0.558944	0.548138	0.563405	0.428962	0.487035	0.5634	0.607481	0.528208	0.572072	0.528967	0.543148	0.567855	0.567294	0.45549
[truncated: 231 more columns]

## Sheet: MTAs for DFF
Supplementary Table S4. MTAs for DFF by FarmCPU and BLINK models under NSI, NSII and pooled seasons
SNP	Model	Chromosome	Position	Allele1	Allele2	MAF	P.value
NSI
S1_2001361	FarmCPU	1	2001361	A	C	0.280357	6.97 × 10-7
S6_2327550	FarmCPU	6	2327550	G	A	0.480357	1.08 × 10-5
S6_45756828	FarmCPU	6	45756828	T	C	0.273214	1.13 × 10-5
NSII
S1_15882390	BLINK	1	15882390	C	T	0.203571	5.54 × 10-8
S6_57417458*	BLINK	6	57417458	G	A	0.135714	4.82 × 10-6
S6_57417458	FarmCPU	6	57417458	G	A	0.135714	1.96 × 10-6
S4_34377824	FarmCPU	4	34377824	G	A	0.341071	1.07 × 10-5
*Marker significantly associated among BLINK, FarmCPU and SUPER models.
DFF- days to 50% flowering, NS-Normal season, MAF-Minor Allele Frequency.

## Sheet: MTAs for DM
Supplementary Table S5. MTAs for DM by FarmCPU and BLINK models under NSI, NSII and pooled seasons
SNP	Model	Chromosome	Position	Allele1	Allele2	MAF	P.value
NSI
S4_31996956*	BLINK	4	31996956	A	C	0.1375	1.02 × 10-9
S4_16620399	BLINK	4	16620399	T	A	0.435714	4.93 × 10-6
S4_31996956	FarmCPU	4	31996956	A	C	0.1375	1.21 × 10-6
S1_11358956	FarmCPU	1	11358956	G	A	0.189286	7.00 × 10-6
NSII
S6_5707534#	BLINK	6	5707534	C	G	0.228571	3.04 × 10-6
S4_34377824	FarmCPU	4	34377824	G	A	0.341071	1.59 × 10-6
S8_7174066	FarmCPU	8	7174066	C	T	0.142857	4.43 × 10-6
S6_5707534	FarmCPU	6	5707534	C	G	0.228571	1.31 × 10-5
S1_1856724	FarmCPU	1	1856724	C	G	0.276786	1.38 × 10-5
Pooled
S4_31996956	FarmCPU	4	31996956	A	C	0.1375	1.25 × 10-6
S4_11898791	FarmCPU	4	11898791	A	G	0.360714	1.36 × 10-6
S6_5777217	FarmCPU	6	5777217	C	T	0.225	1.87 × 10-6
S2_3573526	FarmCPU	2	3573526	C	G	0.0839286	3.66 × 10-6
S6_5707534	BLINK	6	5707534	C	G	0.228571	3.28 × 10-6
S1_15882390	BLINK	1	15882390	C	T	0.203571	1.39 × 10-5
*Marker significantly associated among BLINK, FarmCPU and SUPER models.
DM- days to maturity, NS-Normal season, MAF-Minor Allele Frequency.

## Sheet: MTAs for 100 SW
Supplementary Table S6. MTAs for 100 SW by FarmCPU and BLINK models under NSI, NSII and pooled seasons
NSI
SNP	Model	Chromosome	Position	Allele1	Allele2	MAF	P.value
S6_26554579*	FarmCPU	6	26554579	A	C	0.5	1.63 × 10-8
S6_26554579	BLINK	6	26554579	A	C	0.5	8.63 × 10-8
S7_32973784*	FarmCPU	7	32973784	A	G	0.485714	1.24 × 10-7
S2_191229*	FarmCPU	2	191229	G	A	0.116071	5.96 × 10-7
S6_6142886#	BLINK	6	6142886	T	G	0.45	6.84 × 10-6
S2_191229	BLINK	2	191229	G	A	0.116071	7.46 × 10-6
S5_45441029	FarmCPU	5	45441029	A	T	0.214286	1.59 × 10-5
NSII
S7_32973784	BLINK	7	32973784	A	G	0.485714	4.79 × 10-11
S2_121935	FarmCPU	2	121935	A	G	0.178571	1.64 × 10-8
S6_26554579	BLINK	6	26554579	A	C	0.5	2.78 × 10-8
S7_33355619	BLINK	7	33355619	G	A	0.367857	6.88 × 10-8
S6_6142886	BLINK	6	6142886	T	G	0.45	1.01 × 10-6
S6_57854709	FarmCPU	6	57854709	G	A	0.0714286	2.67 × 10-6
S8_4337447	FarmCPU	8	4337447	C	T	0.360714	3.06 × 10-6
S6_58002730	FarmCPU	6	58002730	T	C	0.178571	3.69 × 10-6
S1_2967164	FarmCPU	1	2967164	T	G	0.114286	1.06 × 10-5
Pooled
S7_32973784	BLINK	7	32973784	A	G	0.485714	1.43 × 10-8
S6_26554579	BLINK	6	26554579	A	C	0.5	1.21 × 10-7
S6_6142886	BLINK	6	6142886	T	G	0.45	5.08 × 10-7
S6_26554579	FarmCPU	6	26554579	A	C	0.5	1.10 × 10-6
S2_191229	FarmCPU	2	191229	G	A	0.116071	5.51 × 10-6
S7_32973784	FarmCPU	7	32973784	A	G	0.485714	1.29 × 10-5
S7_9608151	BLINK	7	9608151	C	T	0.167857	2.17 × 10-5
S2_191229	BLINK	2	191229	G	A	0.116071	2.65 × 10-5
100 SW- 100 seed weight, NS-Normal season, MAF-Minor Allele Frequency.
*Marker significantly associated among BLINK, FarmCPU and SUPER models.
#Marker significantly associated among BLINK and SUPER.

## Sheet: SNP annotation
Supplementary Table S7. Annotation of associated SNPs for nutrient and agronomic traits
SNP_ID	Chromosome	Position	Allele 1	Allele 2	Annotation_Allele	Annotation_Effect	Annotation_Impact	Gene_Id	Sequence Description	GO Biological Process	GO Cellular Component	GO Molecular Function
Protein
S4_4477846	Ca4	4477846	A	G	G	intron_variant	MODIFIER	Ca_03810	probable UDP-N-acetylglucosamine--peptide N-acetylglucosaminyltransferase SEC	protein O-linked glycosylation		transferase activity, transferring glycosyl groups
S6_2302393	Ca6	2302393	T	C	C	intron_variant	MODIFIER	Ca_10360	MAP kinase kinase kinase-like protein	protein phosphorylation		protein kinase activity,ATP binding
S4_30653910	Ca4	30653910	A	G	G	intergenic_region	MODIFIER	Ca_14209-Ca_14210
S6_2667543	Ca6	2667543	C	A	A	intergenic_region	MODIFIER	Ca_10399-Ca_10400
Fe
S7_9379786	Ca7	9379786	T	C	C	intergenic_region	MODIFIER	Ca_17323-Ca_17322
S1_2772537	Ca1	2772537	C	A	A	intergenic_region	MODIFIER	Ca_00340-Ca_00341
S4_34459338	Ca4	34459338	C	G	G	intergenic_region	MODIFIER	Ca_20351-Ca_20350
S1_11613376	Ca1	11613376	T	A	A	intergenic_region	MODIFIER	Ca_02586-Ca_02585
S6_57720344	Ca6	57720344	C	T	T	synonymous_variant	LOW	Ca_13671	B3 domain-containing transcription factor VRN1-like isoform X2	regulation of transcription, DNA-templated	nucleus	DNA binding
S4_31996956	Ca4	31996956	A	C	C	intergenic_region	MODIFIER	Ca_15458-Ca_15459
Zn
S6_7891103	Ca6	7891103	G	A	A	intergenic_region	MODIFIER	Ca_09587-Ca_09586
DFF
S1_2001361	Ca1	2001361	A	C	C	intergenic_region	MODIFIER	Ca_00250-Ca_00251
S6_2327550	Ca6	2327550	G	A	A	intron_variant	MODIFIER	Ca_10363	pentatricopeptide (PPR) repeat protein	RNA modification		zinc ion binding
S6_45756828	Ca6	45756828	T	C	C	missense_variant	MODERATE	Ca_13858	RNA-binding domain CCCH-type zinc finger protein			binding
S1_15882390	Ca1	15882390	C	T	T	missense_variant	MODERATE	Ca_06964	gibberellin 2-beta-dioxygenase 8-like	response to salt stress,gibberellin metabolic process,oxidation-reduction process		metal ion binding,C-20 gibberellin 2-beta-dioxygenase activity
S6_57417458	Ca6	57417458	G	A	A	intron_variant	LOW	Ca_13701	PREDICTED: uncharacterized protein LOC101495369
S4_34377824	Ca4	34377824	G	A	A	intergenic_region	MODIFIER	Ca_20354-Ca_20353
DM
S4_31996956	Ca4	31996956	A	C	C	intergenic_region	MODIFIER	Ca_15458-Ca_15459
S4_16620399	Ca4	16620399	T	A	A	synonymous_variant	LOW	Ca_05461	transcription elongation factor Spt5-like protein, putative	regulation of transcription, DNA-templated,translational elongation		translation elongation factor activity
S1_11358956	Ca1	11358956	G	A	A	intergenic_region	MODIFIER	Ca_02618-Ca_02617
S6_5707534	Ca6	5707534	C	G	G	intergenic_region	MODIFIER	Ca_05723-Ca_05722
S4_34377824	Ca4	34377824	G	A	A	intergenic_region	MODIFIER	Ca_20354-Ca_20353
S8_7174066	Ca8	7174066	C	T	T	synonymous_variant	LOW	Ca_10671	F-box protein SKIP31
S1_1856724	Ca1	1856724	C	G	0	stop_lost	HIGH	Ca_00233	inositol monophosphatase family protein	phosphatidylinositol phosphorylation	chloroplast
S4_11898791	Ca4	11898791	A	G	G	intron_variant	MODIFIER	Ca_04412	CAAX amino terminal protease family protein	proteolysis	integral component of membrane	peptidase activity
S6_5777217	Ca6	5777217	C	T	T	intergenic_region	MODIFIER	Ca_05717-Ca_05716
S2_3573526	Ca2	3573526	C	G	G	intergenic_region	MODIFIER	Ca_10505-Ca_10504
S1_15882390	Ca1	15882390	C	T	T	missense_variant	MODERATE	Ca_06964	gibberellin 2-beta-dioxygenase 8-like	response to salt stress,gibberellin metabolic process,oxidation-reduction process		metal ion binding,C-20 gibberellin 2-beta-dioxygenase activity
100 SW
S6_26554579	Ca6	26554579	A	C	C	intergenic_region	MODIFIER	Ca_16689-Ca_16690
S7_32973784	Ca7	32973784	A	G	G	intergenic_region	MODIFIER	Ca_10001-Ca_10000
S2_191229	Ca2	191229	G	A	A	intergenic_region	MODIFIER	Ca_16972-Ca_16973
S6_6142886	Ca6	6142886	T	G	G	missense_variant	MODERATE	Ca_05681	auxin response factor 2	leaf senescence,negative regulation of cell proliferation,positive regulation of potassium ion import,positive regulation of flower development,auxin-activated signaling pathway,response to abscisic acid,negative regulation of transcription, DNA-templated,floral organ abscission,plant ovule development,fruit dehiscence	nucleus	sequence-specific DNA binding,DNA-binding transcription factor activity
S5_45441029	Ca5	45441029	A	T	T	missense_variant	MODERATE	Ca_03989	PP2A regulatory subunit TAP46	regulation of signal transduction	cytosol	protein phosphatase 2A binding
S2_121935	Ca2	121935	A	G	G	intron_variant	MODIFIER	Ca_16964	palmitoyl-protein thioesterase 1-like	macromolecule depalmitoylation		palmitoyl hydrolase activity
S7_33355619	Ca7	33355619	G	A	A	intron_variant	MODIFIER	Ca_16161	nuclear pore protein	nucleocytoplasmic transport	nuclear pore	structural constituent of nuclear pore
S6_57854709	Ca6	57854709	G	A	A	synonymous_variant	LOW	Ca_13655	LRR receptor-like kinase family protein	protein phosphorylation		protein kinase activity,ATP binding
S8_4337447	Ca8	4337447	C	T	T	intergenic_region	MODIFIER	Ca_02134-Ca_02133
S6_58002730	Ca6	58002730	T	C	C	synonymous_variant	LOW	Ca_13635	NAD(P)H:quinone oxidoreductase, type IV protein	oxidation-reduction process		NAD(P)H dehydrogenase (quinone) activity,FMN binding
S1_2967164	Ca1	2967164	T	G	G	intergenic_region	MODIFIER	Ca_00360-Ca_00361
S7_9608151	Ca7	9608151	C	T	T	intron_variant	MODIFIER	Ca_17295	inositol-tetrakisphosphate 1-kinase 1-like protein	phosphorylation,inositol trisphosphate metabolic process	intracellular	magnesium ion binding,ATP binding,hydrolase activity, acting on ester bonds,inositol tetrakisphosphate 1-kinase activity,inositol-1,3,4-trisphosphate 6-kinase activity,inositol-1,3,4-trisphosphate 5-kinase activity
